# Supplementary material
Source: Elsevier journal article supplement (https://authors.library.caltech.edu/55255/2/mmc1.pdf)
Supplement: mmc1 [file mmc1.pdf]

1 **Electronic Annex Figure Captions**

2

3 Supplementary Figure EA1. Mass scans for  $^{30}\text{Si}$  and  $^{18}\text{O}$ .

4

5 Supplementary Figure EA2. Qualitative relative intensity elemental maps corresponding to the analytic  
6 area shown in Figure 5: (a) Al, (b) Mg, (c) Fe, (d) Ca, and (e) P.

7

8 Supplementary Figure EA3. Qualitative relative intensity elemental maps corresponding to the analytic  
9 area shown in Figure 7: (a) Al, (b) Mg, (c) Fe, (d) Ca, and (e) Ti.

10

11 Supplementary Figure EA4. Qualitative relative intensity elemental maps corresponding to the analytic  
12 area shown in Figure 8: (a) Al, (b) Mg, (c) Fe, (d) Ca, and (e) Ti.

13

14 Supplementary Figure EA5. Thin section photomicrographs of the samples analyzed in this study, with  
15 locations of Si (black) and O (red) analytical grids indicated.

16

17 Supplementary Figure EA6. Mean  $\delta^{30}\text{Si}$  vs.  $\delta^{18}\text{O}$  for the samples in this study.

18

19 Supplementary Figure EA7. Selected standard analyses of Caltech Rose Quartz and NBS-28 quartz sand  
20 from multiple analysis sessions.

21

Supplementary Figure EA1

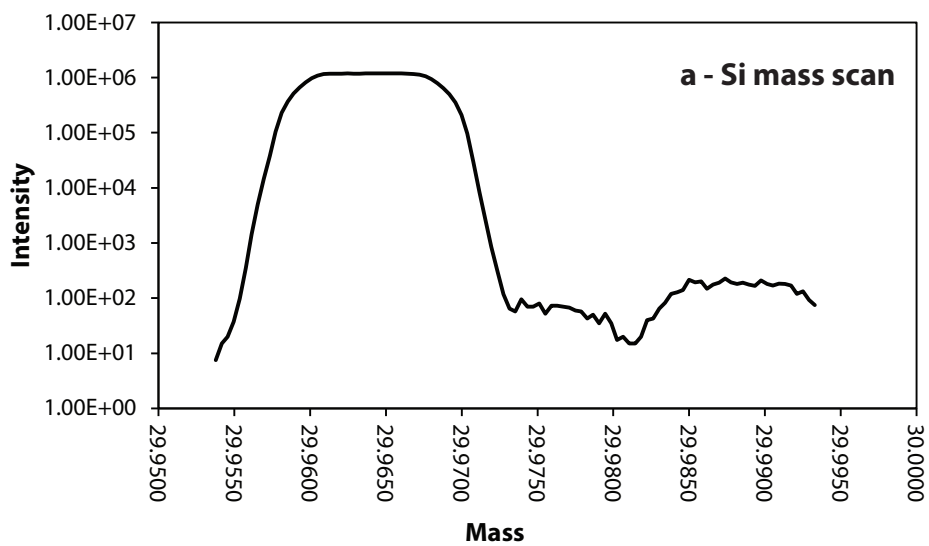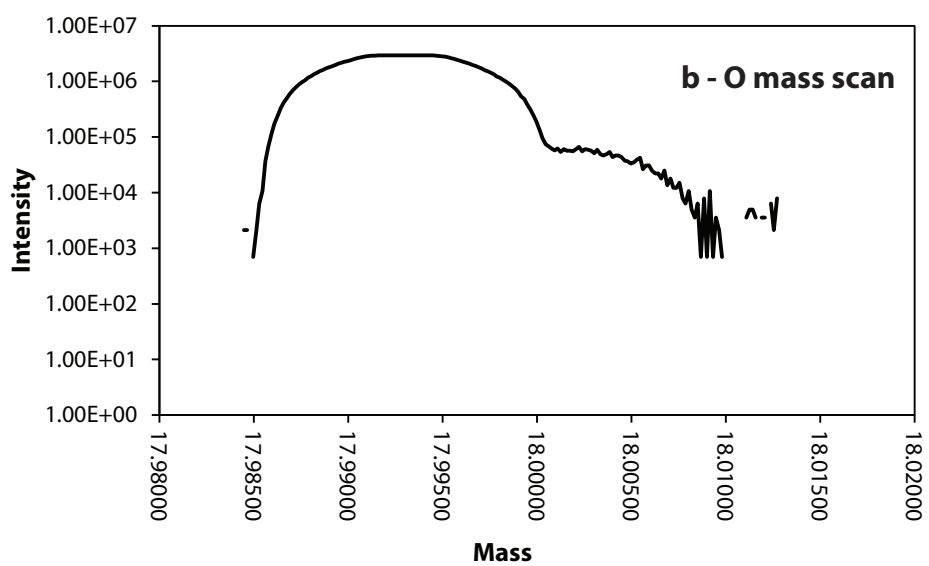

Supplementary Figure EA2

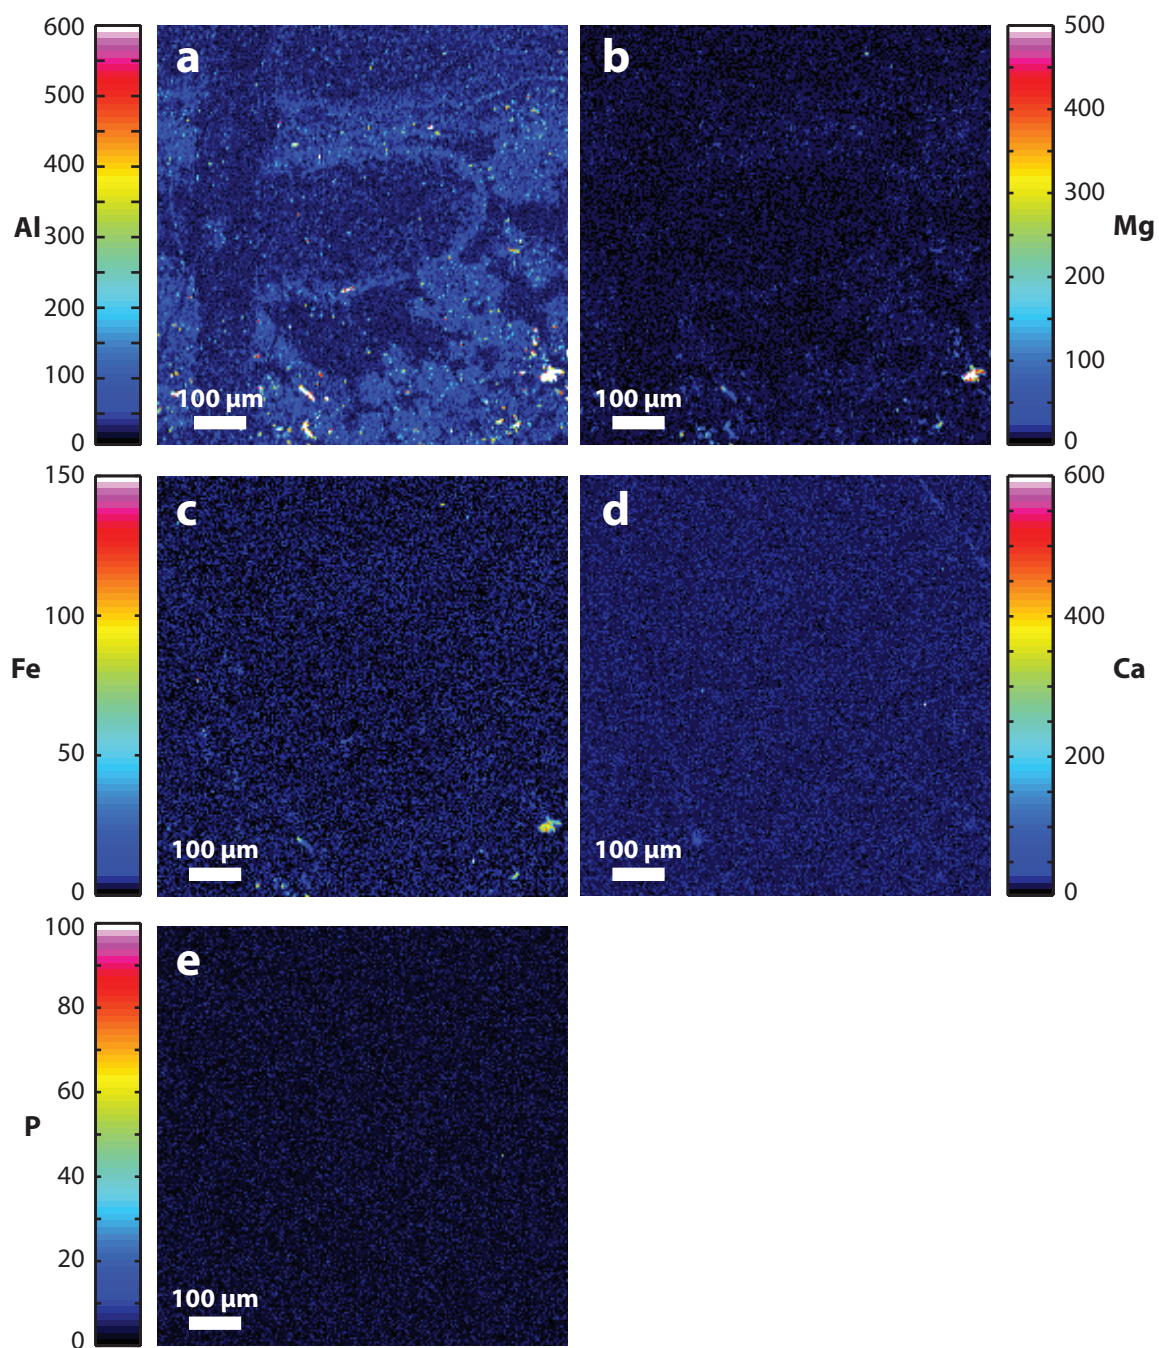

Supplementary Figure EA3

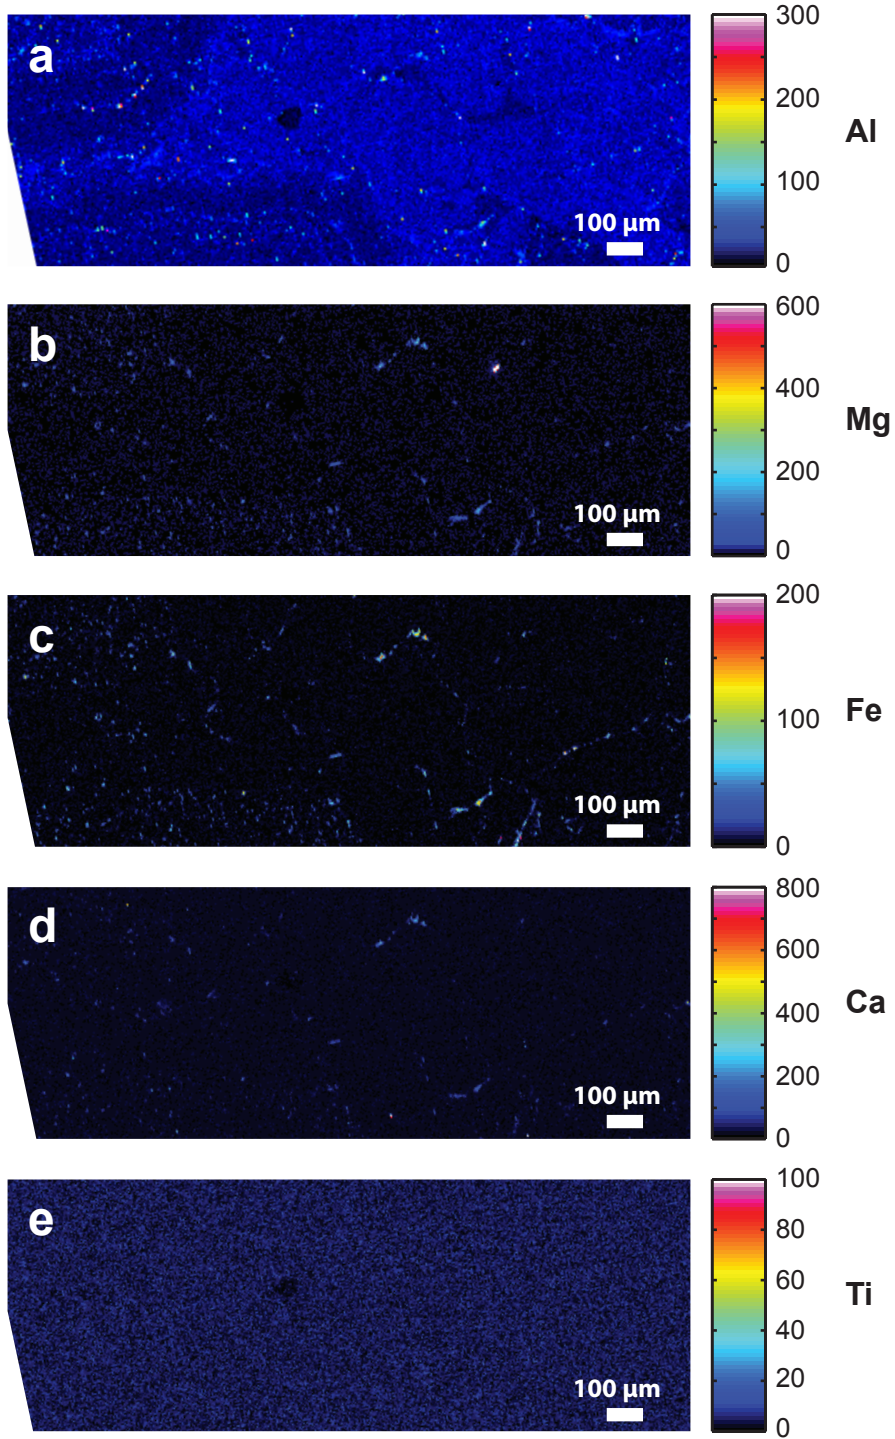

Supplementary Figure EA4

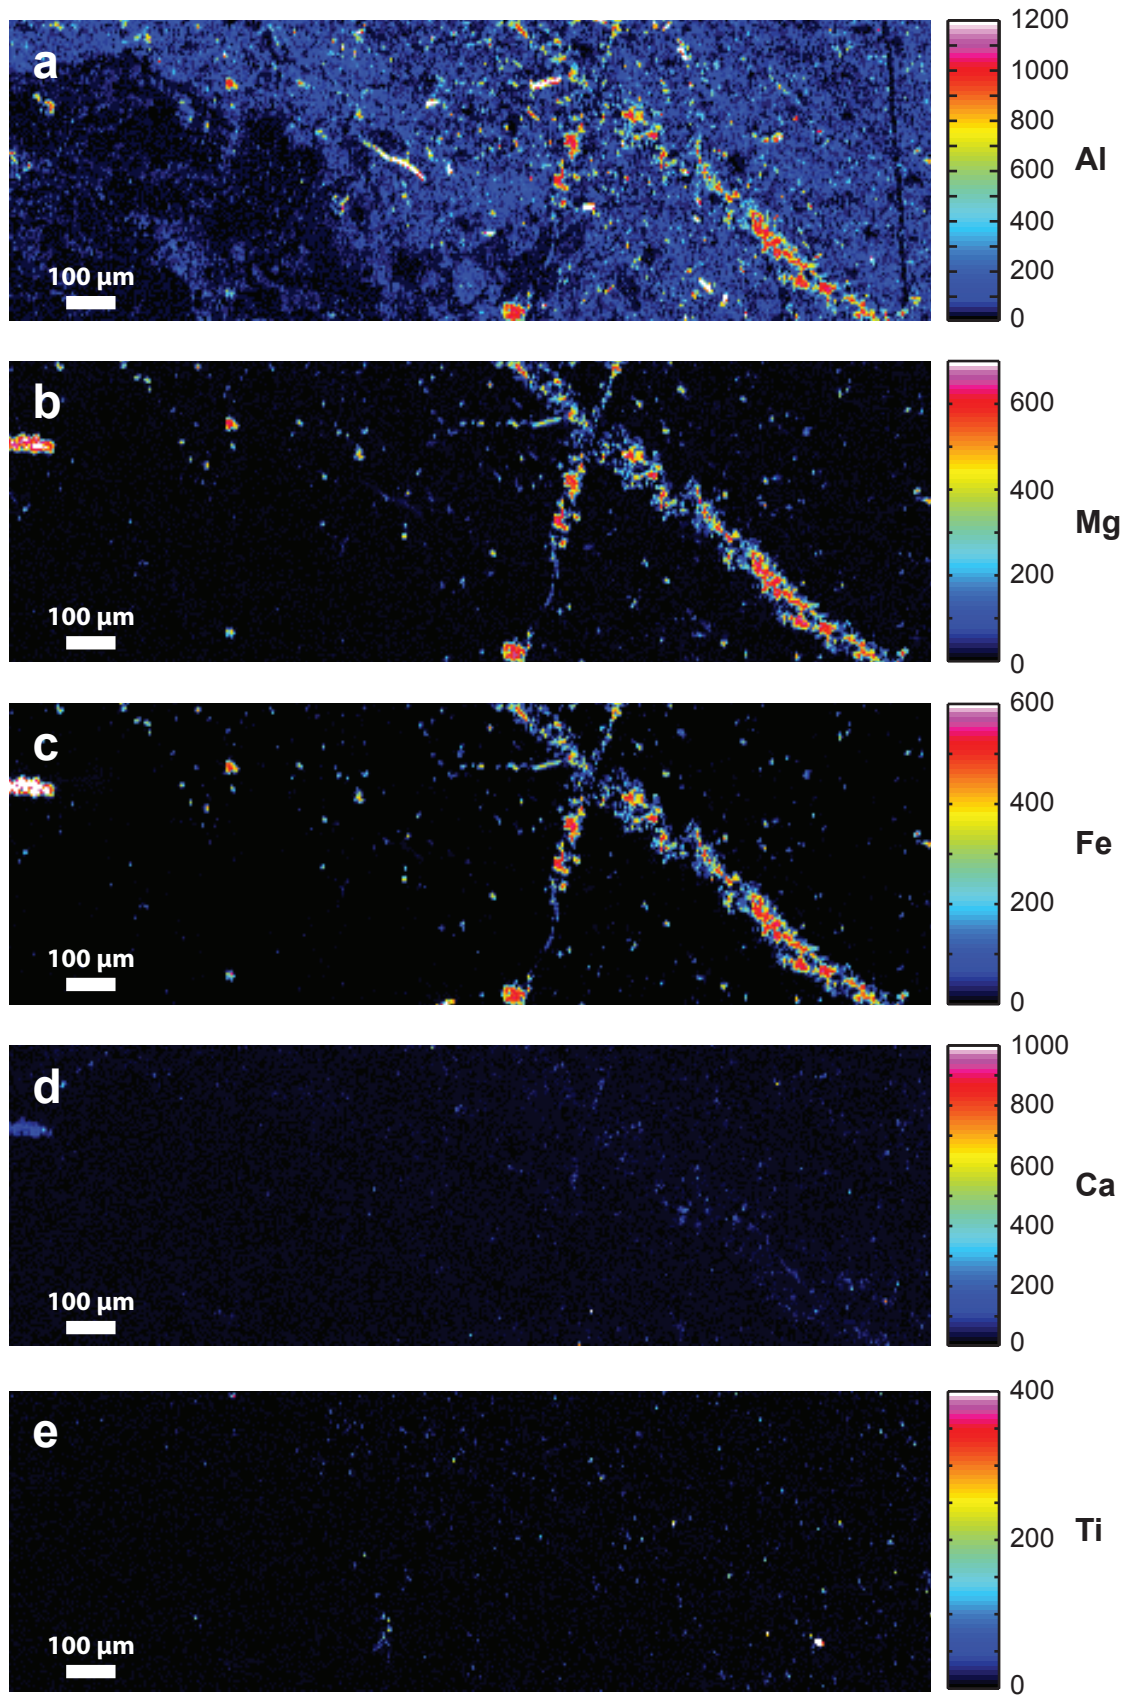

Supplementary Figure EA5

BH-03-7

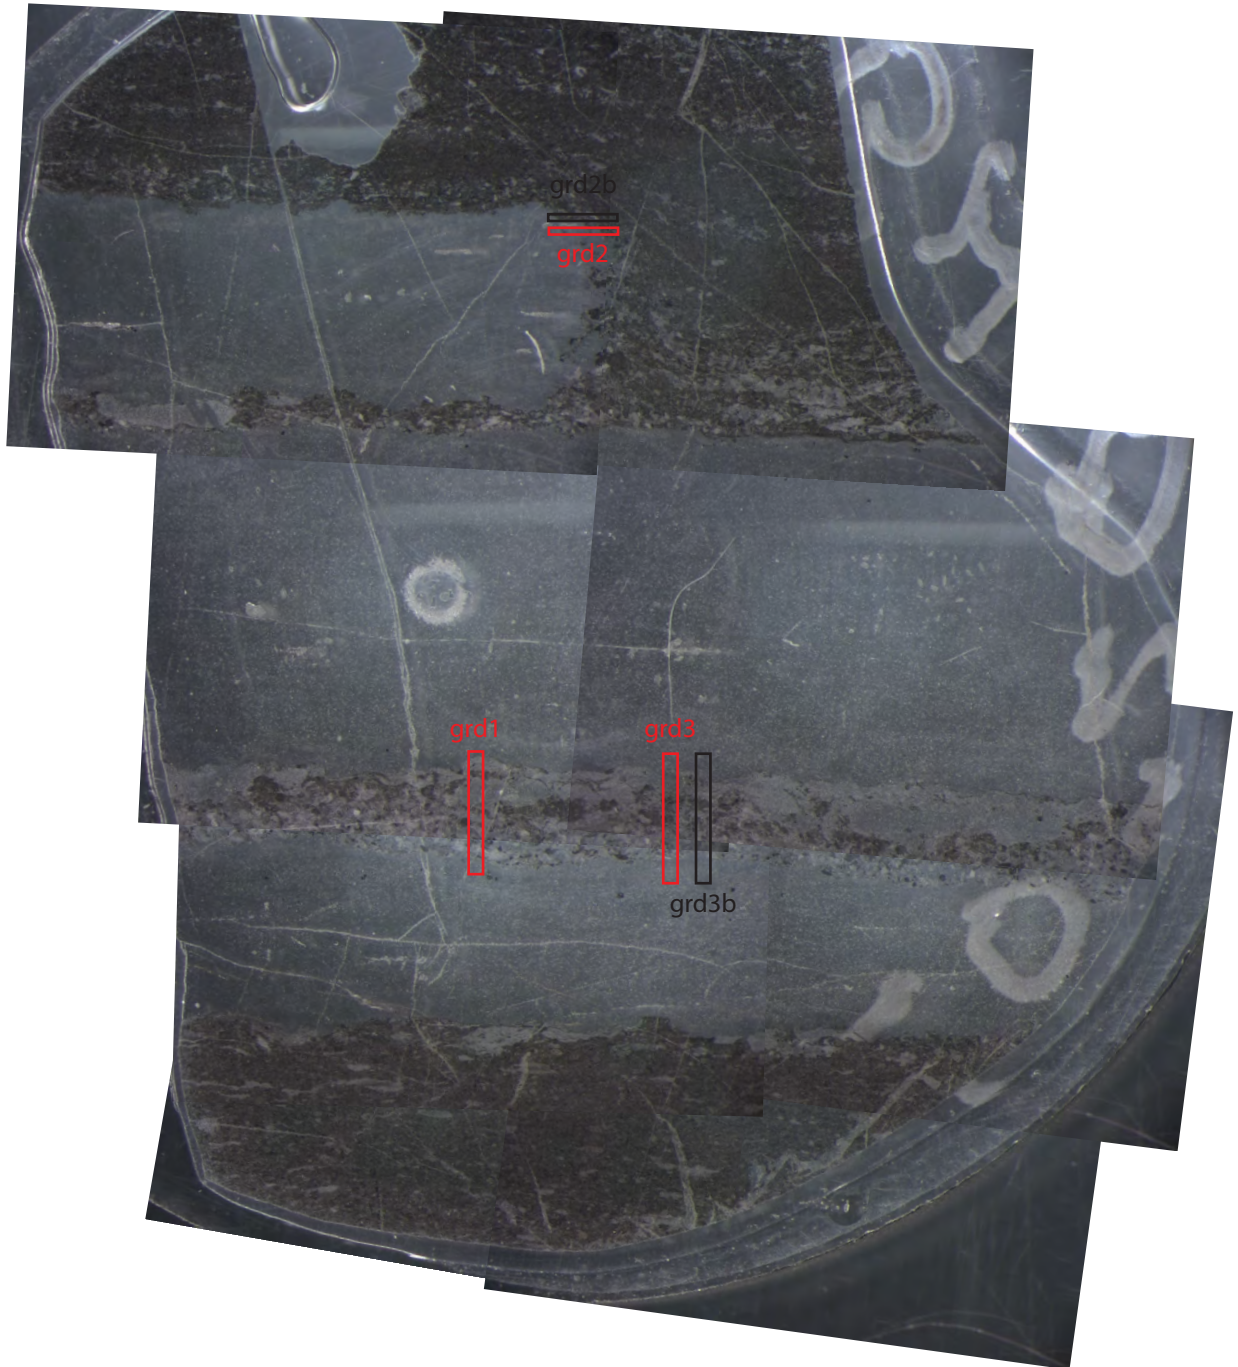

BH-03-9

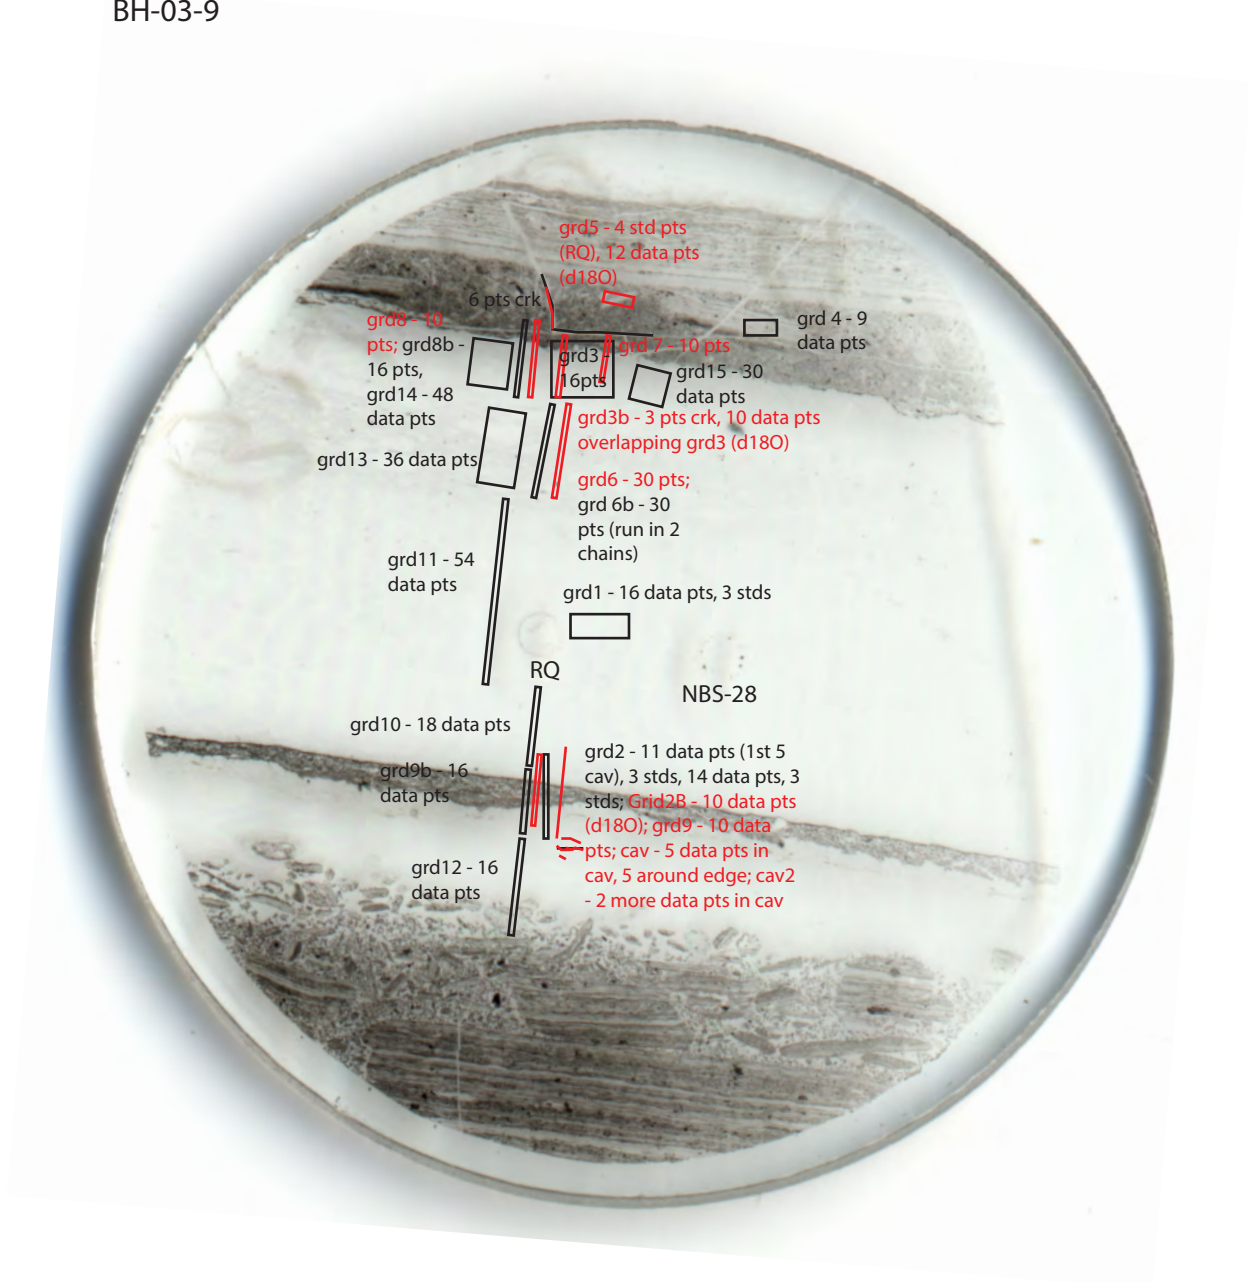

BRC-01-2

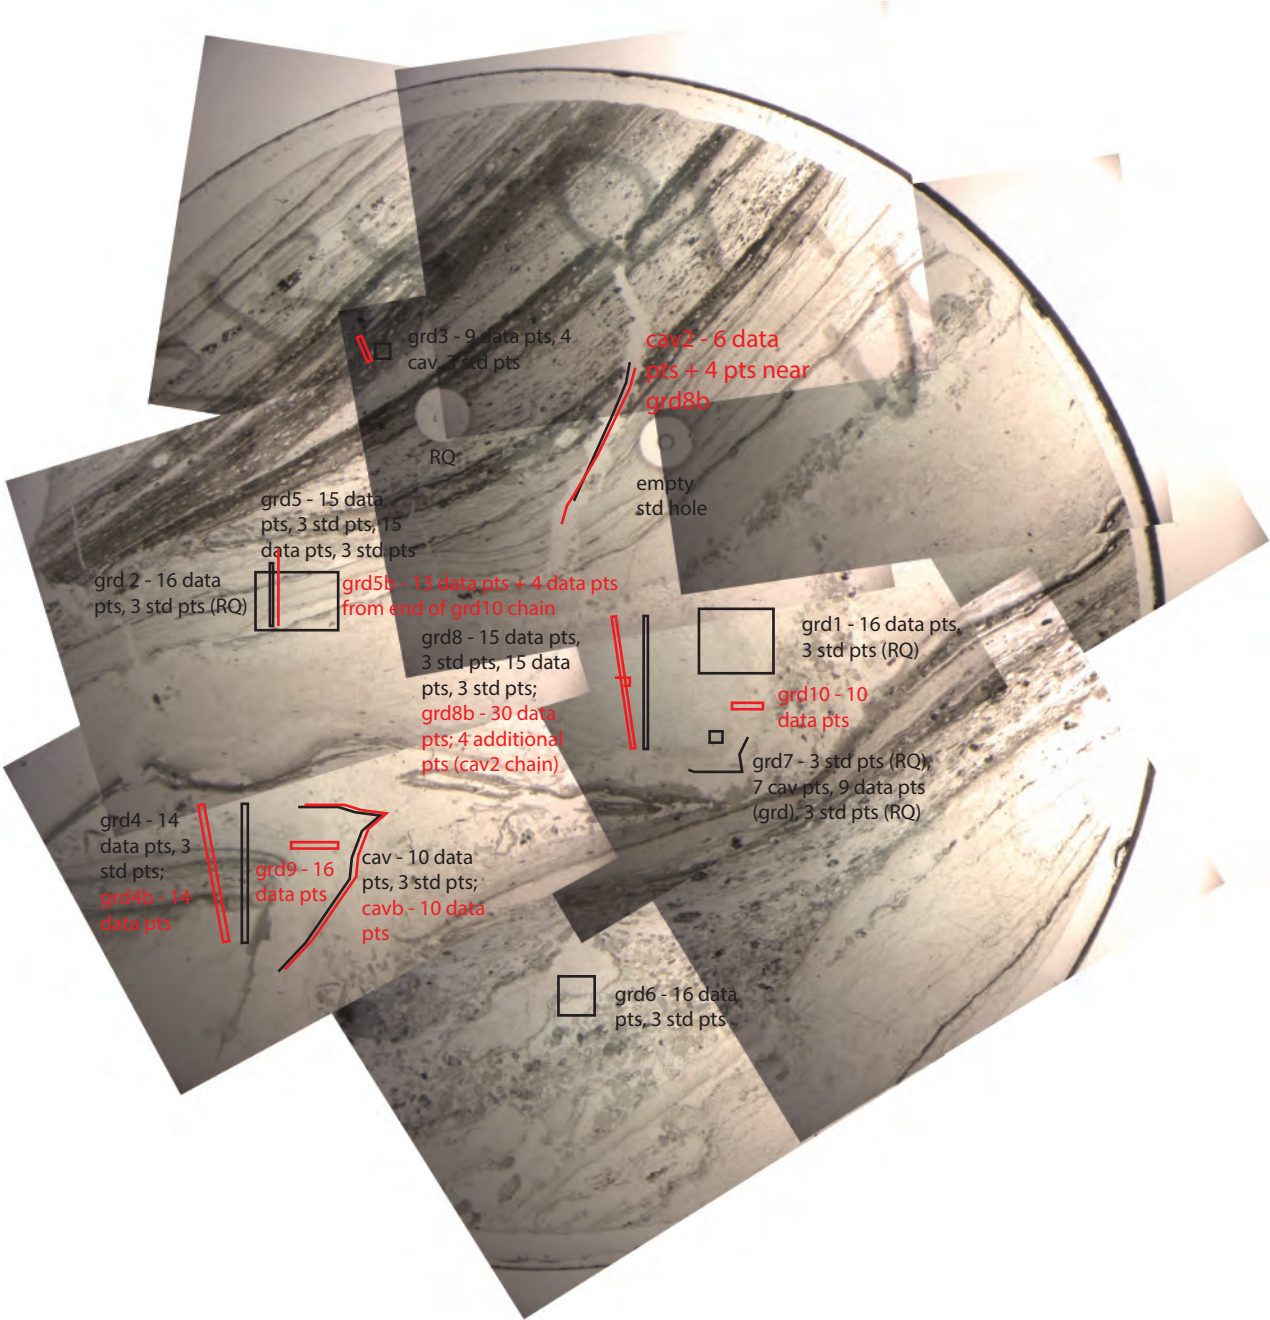



BRC-01-3a

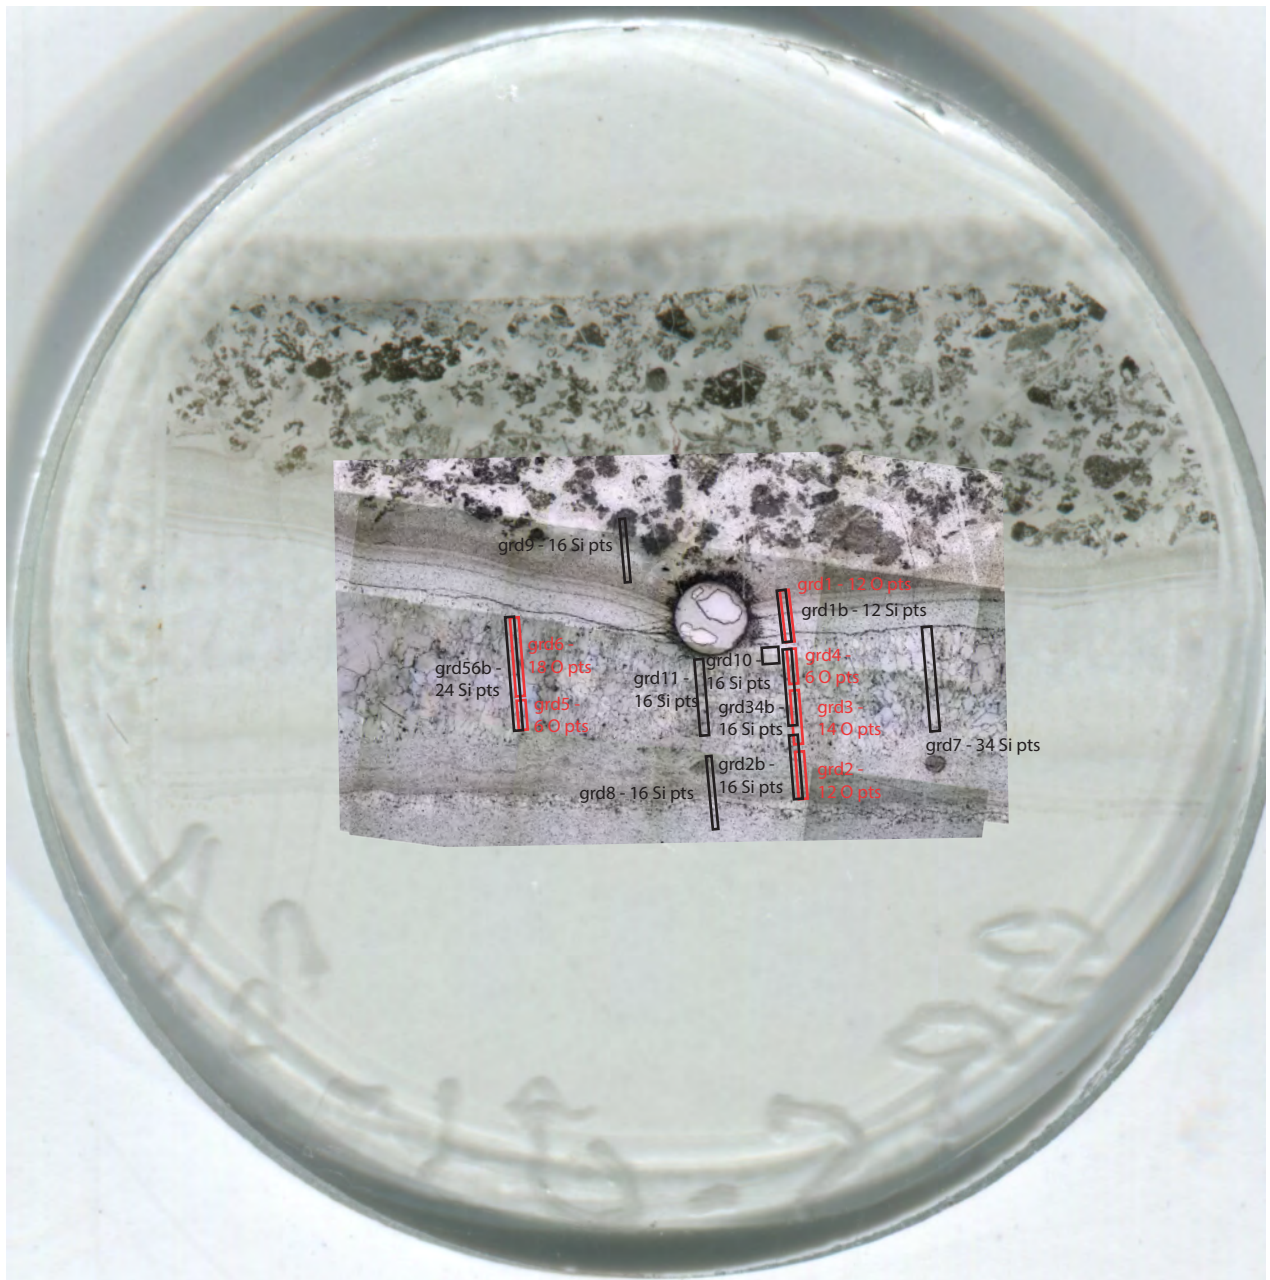

SAF 521-14

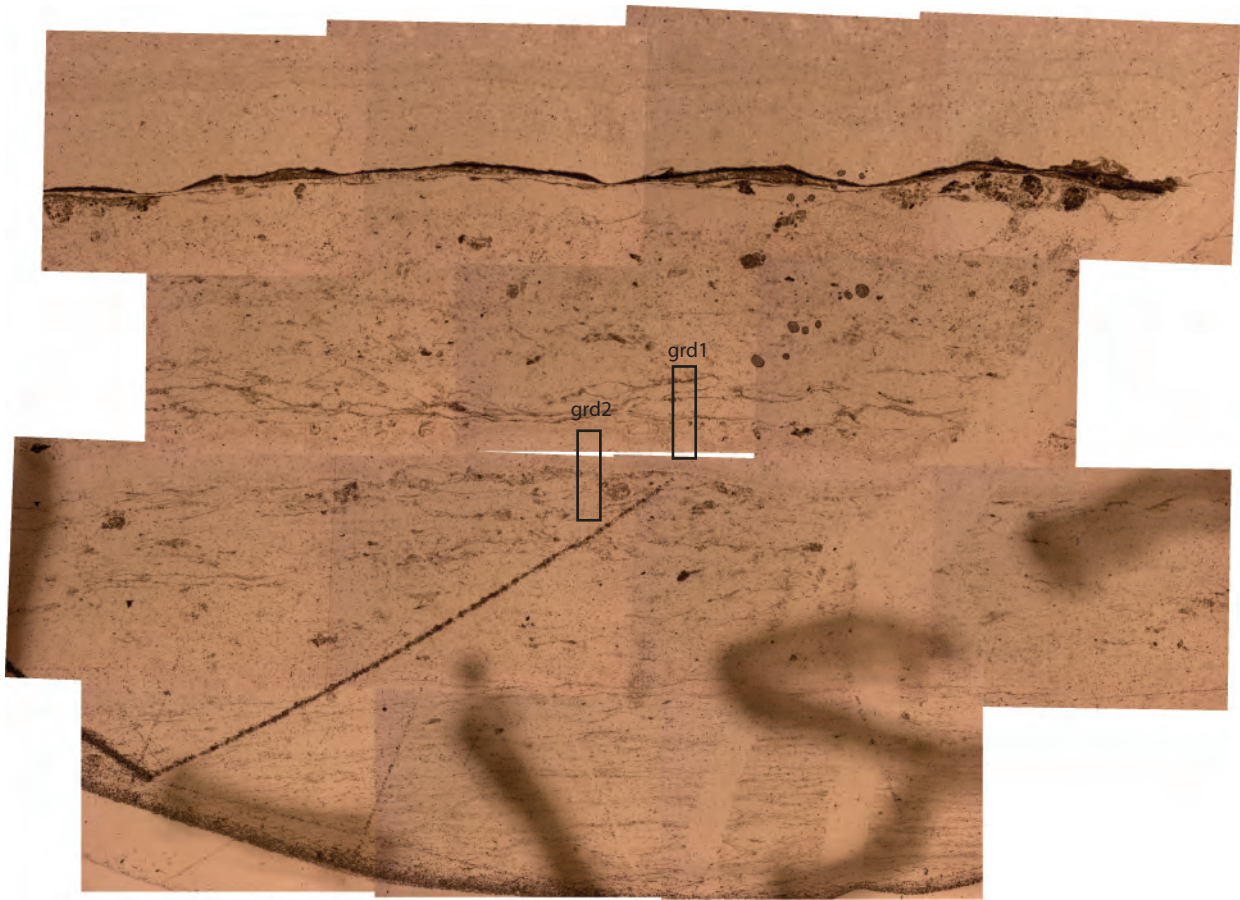

SAF 521-15

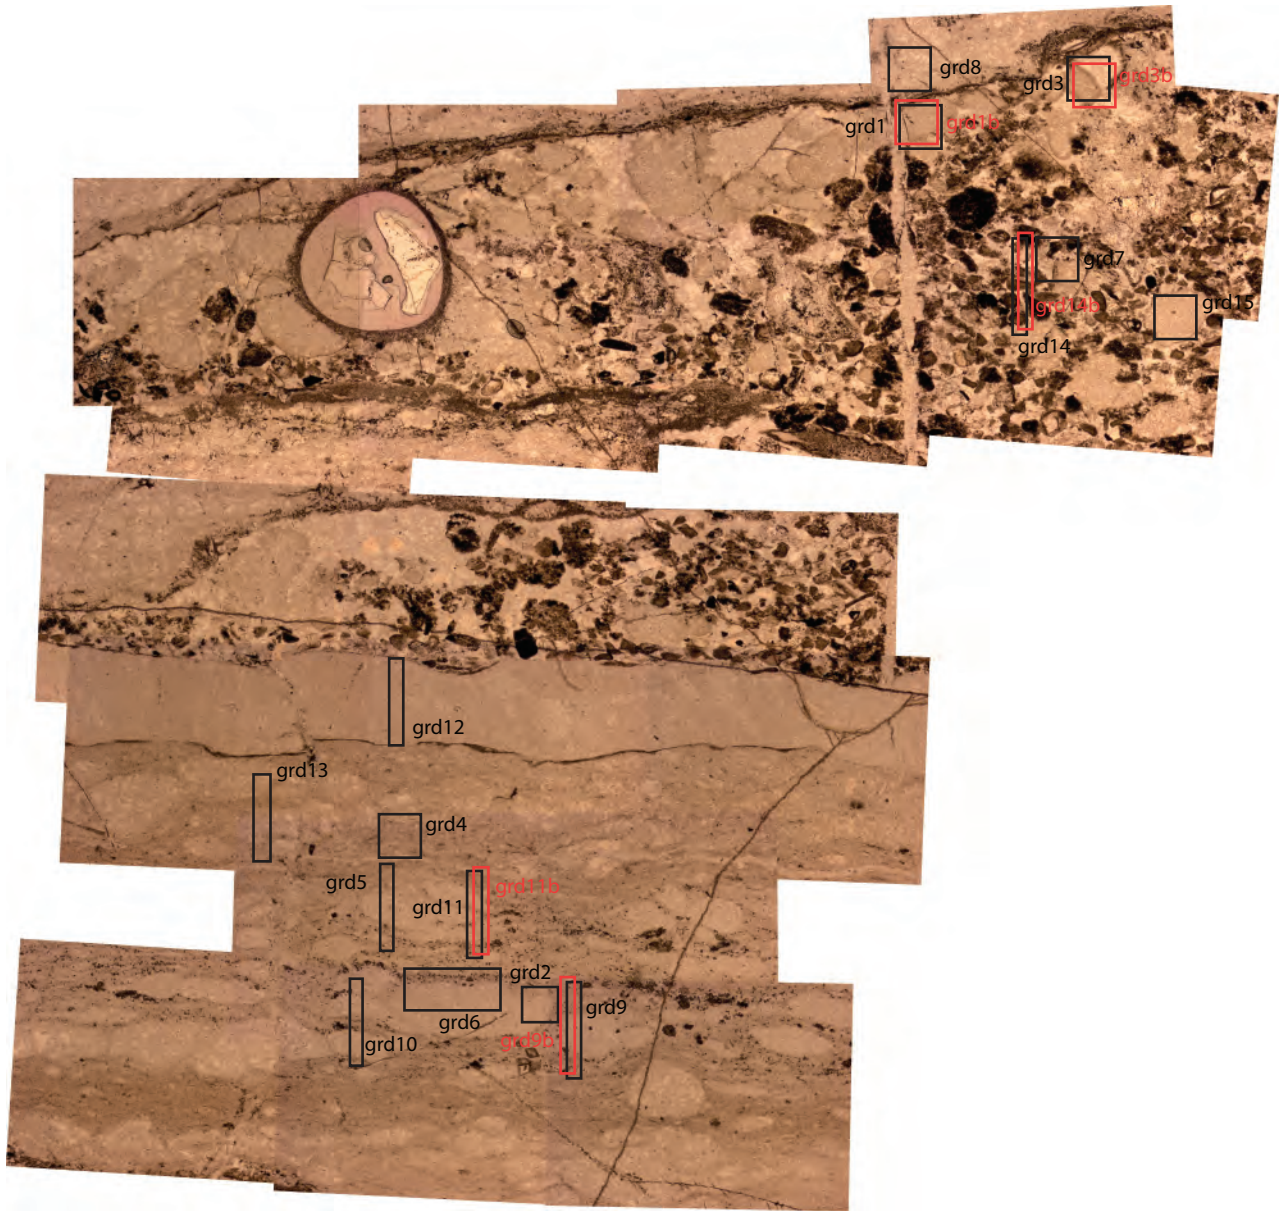

SAF 521-16

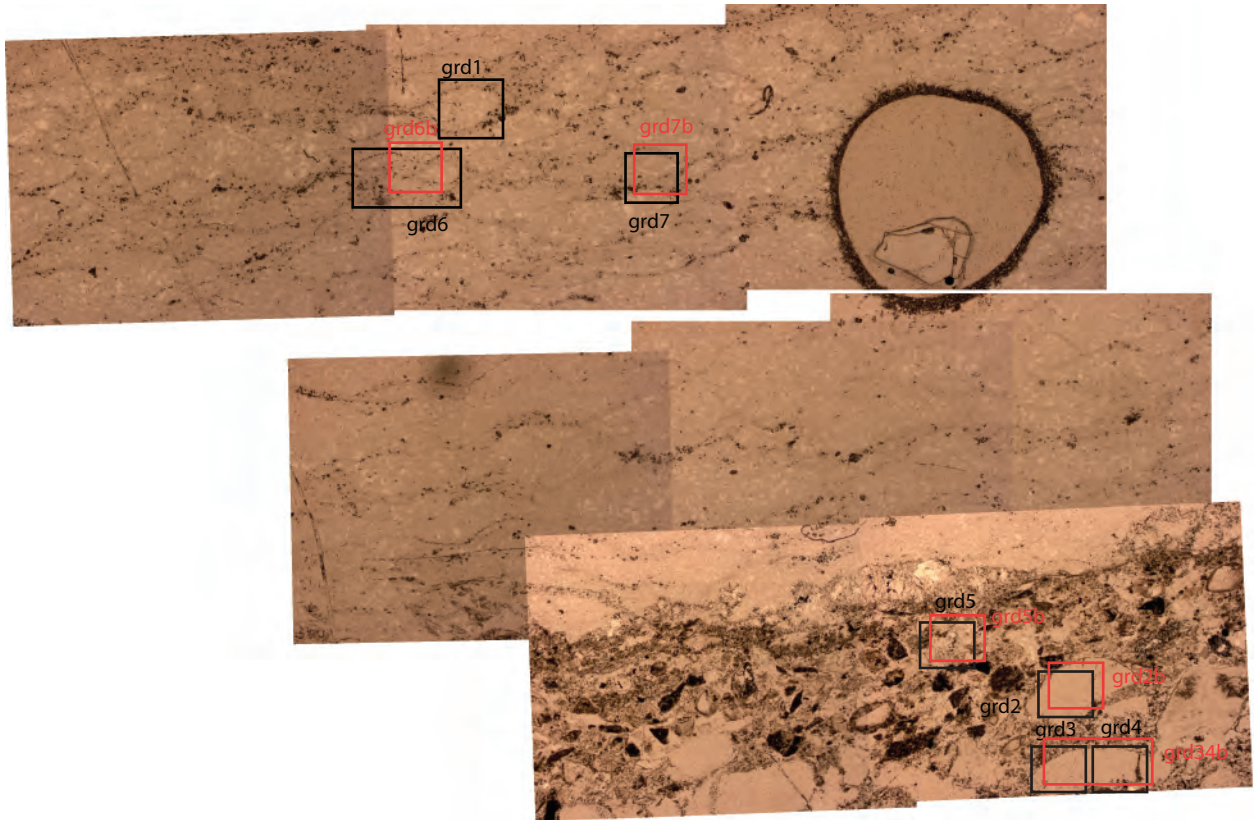

Supplementary Figure EA6

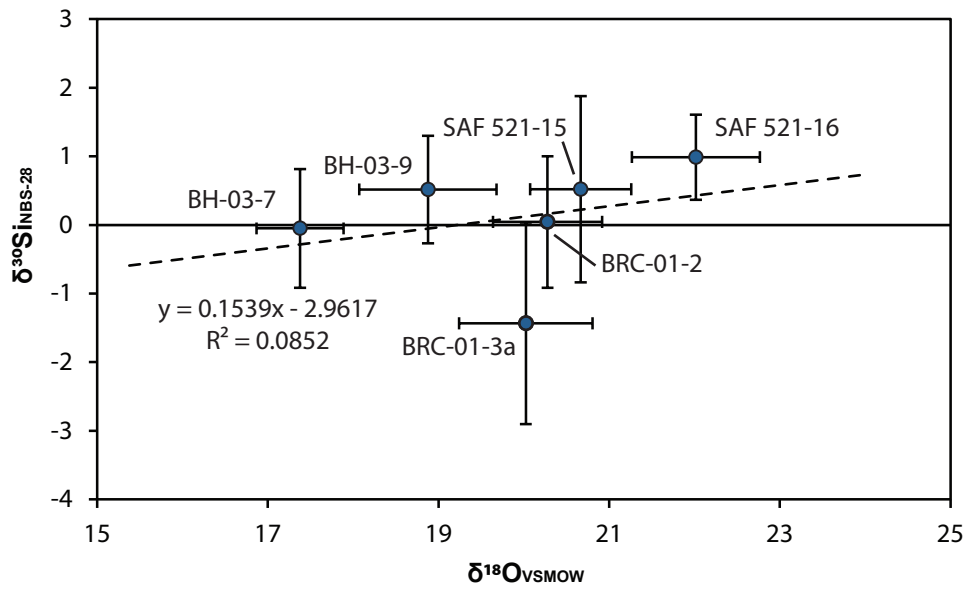

Supplementary Figure EA7

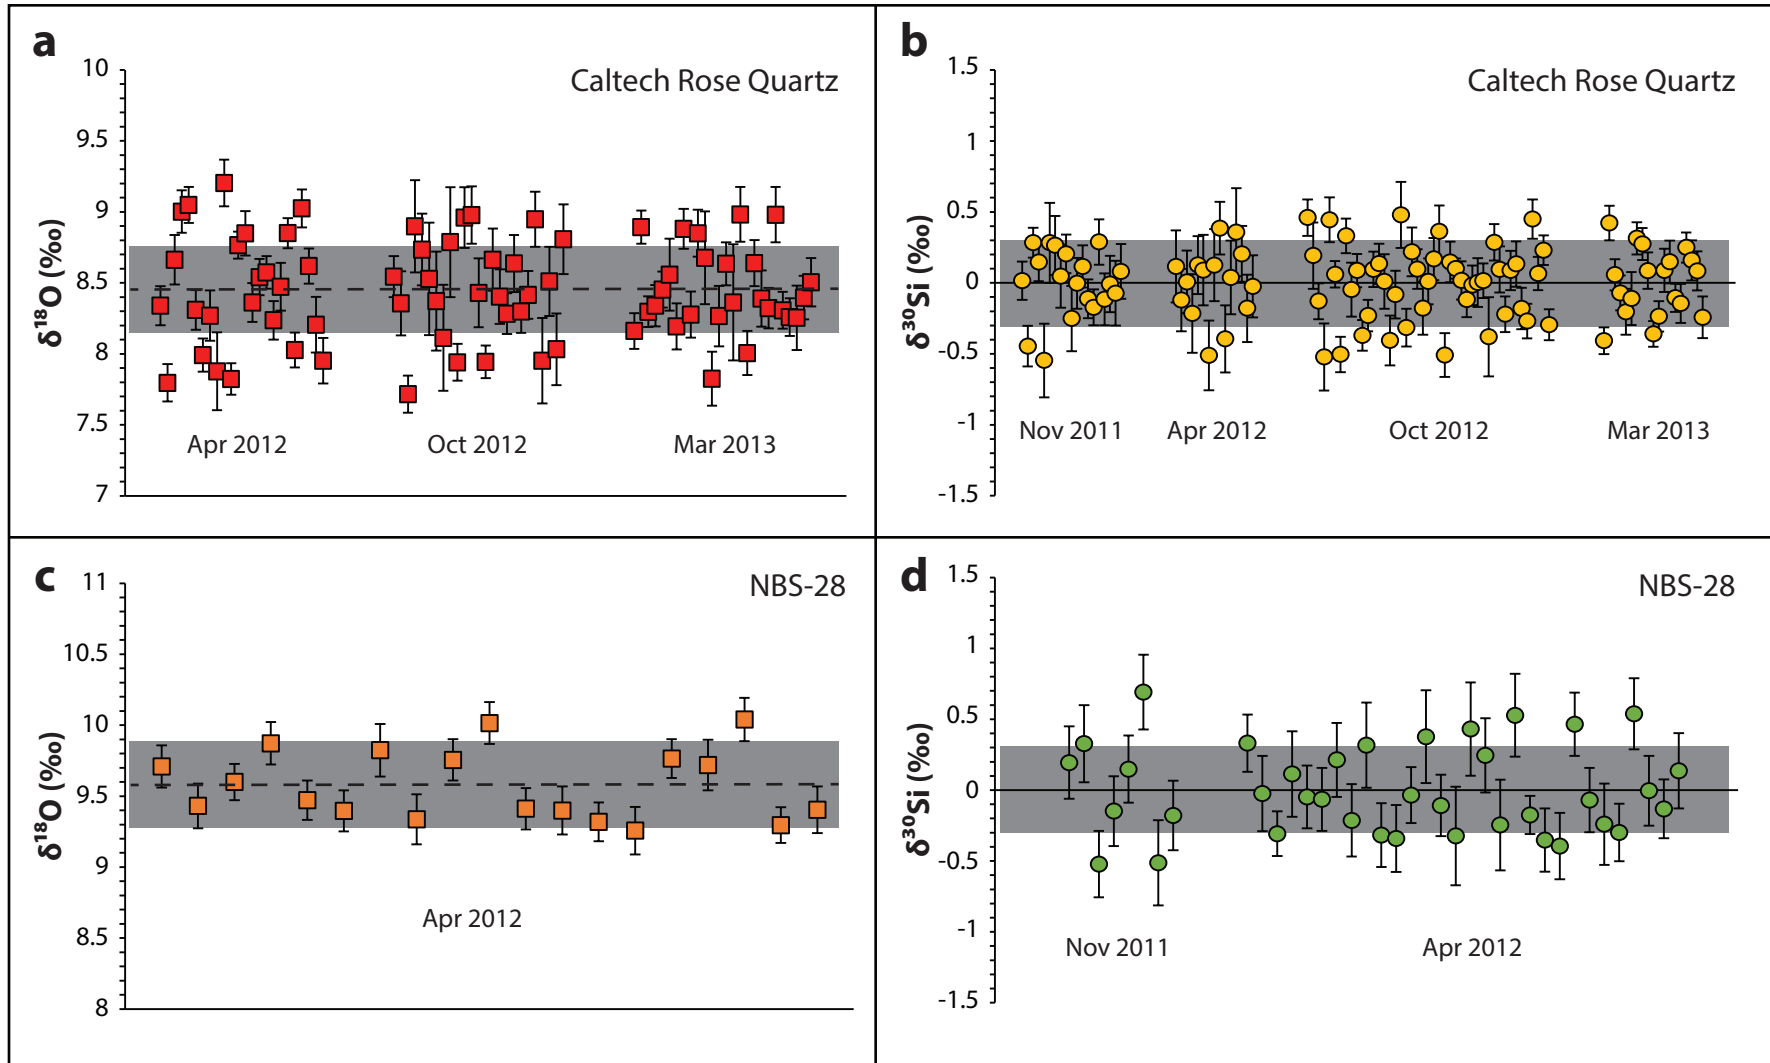

Table EA1: n-way ANOVA analysis of the relationship between population means and texture and sample variability

| <b>Sample</b>  | <b><math>\delta^{30}\text{Si}</math> – means are significantly different</b> | <b><math>\delta^{18}\text{O}</math> – means are significantly different</b> |
|----------------|------------------------------------------------------------------------------|-----------------------------------------------------------------------------|
| <i>Texture</i> |                                                                              |                                                                             |
| Chert          | 1: Cav                                                                       | [none]                                                                      |
| Carb           | 1: Cav                                                                       | [none]                                                                      |
| Cav            | 2: Chert, Carb                                                               | [none]                                                                      |
| <i>Sample</i>  |                                                                              |                                                                             |
| BH-03-7        | 4: BH-03-9, SAF 521-14, SAF 521-15, SAF 521-16                               | 5: BH-03-9, BRC-01-2, BRC-01-3a, SAF 521-15, SAF 521-16                     |
| BH-03-9        | 4: BH-03-7, BRC-01-3a, SAF 521-15, SAF 521-16                                | 5: BH-03-7, BRC-01-2, BRC-01-3a, SAF 521-15, SAF 521-16                     |
| BRC-01-2       | 4: BRC-01-3a, SAF 521-14, SAF 521-15, SAF 521-16                             | 3: BH-03-7, BH-03-9, SAF 521-16                                             |
| BRC-01-3a      | 5: BH-03-9, BRC-01-2, SAF 521-14, SAF 521-15, SAF 521-16                     | 4: BH-03-7, BH-03-9, SAF 521-15, SAF 521-16                                 |
| SAF 521-14     | 3: BH-03-7, BRC-01-2, BRC-01-3a                                              | [no data]                                                                   |
| SAF 521-15     | 4: BH-03-7, BH-03-9, BRC-01-2, BRC-01-3a                                     | 4: BH-03-7, BH-03-9, BRC-01-3a, SAF 521-16                                  |
| SAF 521-16     | 4: BH-03-7, BH-03-9, BRC-01-2, BRC-01-3a                                     | 5: BH-03-7, BH-03-9, BRC-01-2, BRC-01-3a, SAF 521-15                        |

**Table EA2 - Si isotope data**

| filename                | d30Si | 1sign | texture | x     | y     | grid    | sample  | analysis# | Figure |
|-------------------------|-------|-------|---------|-------|-------|---------|---------|-----------|--------|
| BH03-9_grd1.asc         | 0.01  | 0.25  | chb     | -2002 | 1537  | grd1    | BH-03-9 | 1         | NaN    |
| BH03-9_grd1@0.asc       | -0.03 | 0.34  | chb     | -1669 | 1537  | grd1    | BH-03-9 | 2         | NaN    |
| BH03-9_grd1@1.asc       | 0.99  | 0.29  | chb     | -1336 | 1537  | grd1    | BH-03-9 | 3         | NaN    |
| BH03-9_grd1@2.asc       | 0.24  | 0.33  | chb     | -1002 | 1537  | grd1    | BH-03-9 | 4         | NaN    |
| BH03-9_grd1@3.asc       | -0.16 | 0.26  | chb     | -1002 | 1612  | grd1    | BH-03-9 | 5         | NaN    |
| BH03-9_grd1@4.asc       | 0.16  | 0.31  | chb     | -1336 | 1612  | grd1    | BH-03-9 | 6         | NaN    |
| BH03-9_grd1@5.asc       | 0.18  | 0.27  | chb     | -1669 | 1612  | grd1    | BH-03-9 | 7         | NaN    |
| BH03-9_grd1@6.asc       | 0.10  | 0.33  | chb     | -2002 | 1612  | grd1    | BH-03-9 | 8         | NaN    |
| BH03-9_grd1@7.asc       | 0.55  | 0.33  | chb     | -2002 | 1687  | grd1    | BH-03-9 | 9         | NaN    |
| BH03-9_grd1@8.asc       | 1.38  | 0.52  | chb     | -1669 | 1687  | grd1    | BH-03-9 | 10        | NaN    |
| BH03-9_grd1@9.asc       | -0.11 | 0.30  | chb     | -1336 | 1687  | grd1    | BH-03-9 | 11        | NaN    |
| BH03-9_grd1@10.asc      | 0.10  | 0.43  | chb     | -1002 | 1687  | grd1    | BH-03-9 | 12        | NaN    |
| BH03-9_grd1@11.asc      | 0.21  | 0.29  | chb     | -1002 | 1762  | grd1    | BH-03-9 | 13        | NaN    |
| BH03-9_grd1@12.asc      | 0.76  | 0.40  | chb     | -1336 | 1762  | grd1    | BH-03-9 | 14        | NaN    |
| BH03-9_grd1@13.asc      | 0.68  | 0.37  | chb     | -1669 | 1762  | grd1    | BH-03-9 | 15        | NaN    |
| BH03-9_grd1@14.asc      | 0.40  | 0.29  | chb     | -2002 | 1762  | grd1    | BH-03-9 | 16        | NaN    |
| BH03-9_grd2.asc         | -1.35 | 0.48  | cement  | -2893 | NaN   | grd2    | BH-03-9 | 1         | NaN    |
| BH03-9_grd2@0.asc       | -1.20 | 0.50  | cement  | -2724 | NaN   | grd2    | BH-03-9 | 2         | NaN    |
| BH03-9_grd2@1.asc       | -1.72 | 0.50  | cement  | -2548 | NaN   | grd2    | BH-03-9 | 3         | NaN    |
| BH03-9_grd2@2.asc       | -1.80 | 0.41  | cement  | -2469 | NaN   | grd2    | BH-03-9 | 4         | NaN    |
| BH03-9_grd2@3.asc       | -1.43 | 0.52  | cement  | -2396 | -3872 | grd2    | BH-03-9 | 5         | NaN    |
| BH03-9_grd2@4.asc       | 1.41  | 0.35  | chb     | -3118 | -1679 | grd2    | BH-03-9 | 6         | NaN    |
| BH03-9_grd2@5.asc       | 1.51  | 0.48  | chb     | -3018 | -1679 | grd2    | BH-03-9 | 7         | NaN    |
| BH03-9_grd2@6.asc       | 1.12  | 0.48  | chb     | -3018 | -1879 | grd2    | BH-03-9 | 8         | NaN    |
| BH03-9_grd2@7.asc       | 0.79  | 0.39  | chb     | -3118 | -1879 | grd2    | BH-03-9 | 9         | NaN    |
| BH03-9_grd2@8.asc       | 1.08  | 0.47  | chb     | -3118 | -2079 | grd2    | BH-03-9 | 10        | NaN    |
| BH03-9_grd2@9.asc       | 0.51  | 0.62  | chb     | -3018 | -2079 | grd2    | BH-03-9 | 11        | NaN    |
| BH03-9_grd2@13.asc      | -0.63 | 0.44  | chb     | -3018 | -2279 | grd2    | BH-03-9 | 12        | NaN    |
| BH03-9_grd2@14.asc      | 0.32  | 0.40  | chb     | -3118 | -2279 | grd2    | BH-03-9 | 13        | NaN    |
| BH03-9_grd2@15.asc      | -0.25 | 0.49  | chb     | -3118 | -2479 | grd2    | BH-03-9 | 14        | NaN    |
| BH03-9_grd2@16.asc      | 0.30  | 0.56  | chb     | -3018 | -2479 | grd2    | BH-03-9 | 15        | NaN    |
| BH03-9_grd2@17.asc      | 0.11  | 0.55  | carbb   | -3018 | -2679 | grd2    | BH-03-9 | 16        | NaN    |
| BH03-9_grd2@18.asc      | -0.59 | 0.52  | carbb   | -3118 | -2679 | grd2    | BH-03-9 | 17        | NaN    |
| BH03-9_grd2@19.asc      | 0.45  | 0.50  | carbb   | -3118 | -2879 | grd2    | BH-03-9 | 18        | NaN    |
| BH03-9_grd2@20.asc      | -0.63 | 0.58  | carbb   | -3018 | -2879 | grd2    | BH-03-9 | 19        | NaN    |
| BH03-9_grd2@21.asc      | 0.29  | 0.49  | carbb   | -3018 | -3079 | grd2    | BH-03-9 | 20        | NaN    |
| BH03-9_grd2@22.asc      | 0.39  | 0.38  | carbb   | -3118 | -3079 | grd2    | BH-03-9 | 21        | NaN    |
| BH03-9_grd2@23.asc      | 0.16  | 0.46  | chb     | -3118 | -3279 | grd2    | BH-03-9 | 22        | NaN    |
| BH03-9_grd2@24.asc      | 0.55  | 0.54  | chb     | -3018 | -3279 | grd2    | BH-03-9 | 23        | NaN    |
| BH03-9_grd2@25.asc      | 0.51  | 0.42  | chb     | -3018 | -3479 | grd2    | BH-03-9 | 24        | NaN    |
| BH03-9_grd2@26.asc      | -0.06 | 0.40  | chb     | -3118 | -3479 | grd2    | BH-03-9 | 25        | NaN    |
| BH03-9_grd345vein.asc   | -0.58 | 0.62  | vein    | -3093 | NaN   | grdvein | BH-03-9 | 1         | NaN    |
| BH03-9_grd345vein@0.asc | 1.14  | 0.99  | vein    | -3021 | NaN   | grdvein | BH-03-9 | 2         | NaN    |
| BH03-9_grd345vein@1.asc | 0.07  | 0.49  | vein    | -2958 | NaN   | grdvein | BH-03-9 | 3         | NaN    |
| BH03-9_grd345vein@2.asc | 0.54  | 0.58  | vein    | -2530 | NaN   | grdvein | BH-03-9 | 4         | NaN    |



|                          |       |      |        |       |      |         |          |    |     |
|--------------------------|-------|------|--------|-------|------|---------|----------|----|-----|
| BH03-9_grd345vein@3.asc  | 0.03  | 0.66 | vein   | -1794 | NaN  | grdvein | BH-03-9  | 5  | NaN |
| BH03-9_grd345vein@4.asc  | 0.47  | 0.57 | vein   | -732  | NaN  | grdvein | BH-03-9  | 6  | NaN |
| BH03-9_grd345vein@5.asc  | 0.91  | 0.65 | chb    | -3058 | 7178 | grd3    | BH-03-9  | 1  | NaN |
| BH03-9_grd345vein@6.asc  | 1.40  | 0.51 | chb    | -2558 | 7178 | grd3    | BH-03-9  | 2  | NaN |
| BH03-9_grd345vein@7.asc  | 0.59  | 0.48 | chb    | -2058 | 7178 | grd3    | BH-03-9  | 3  | NaN |
| BH03-9_grd345vein@8.asc  | 0.84  | 0.50 | chb    | -1558 | 7178 | grd3    | BH-03-9  | 4  | NaN |
| BH03-9_grd345vein@9.asc  | 0.88  | 0.48 | chb    | -1558 | 7503 | grd3    | BH-03-9  | 5  | NaN |
| BH03-9_grd345vein@10.asc | 0.72  | 0.76 | chb    | -2058 | 7503 | grd3    | BH-03-9  | 6  | NaN |
| BH03-9_grd345vein@11.asc | 0.29  | 0.50 | chb    | -2558 | 7503 | grd3    | BH-03-9  | 7  | NaN |
| BH03-9_grd345vein@12.asc | 0.91  | 0.48 | chb    | -3058 | 7503 | grd3    | BH-03-9  | 8  | NaN |
| BH03-9_grd345vein@16.asc | 1.07  | 0.71 | chb    | -3058 | 7828 | grd3    | BH-03-9  | 9  | NaN |
| BH03-9_grd345vein@17.asc | 0.57  | 0.56 | chb    | -2558 | 7828 | grd3    | BH-03-9  | 10 | NaN |
| BH03-9_grd345vein@18.asc | -0.28 | 0.64 | chb    | -2058 | 7828 | grd3    | BH-03-9  | 11 | NaN |
| BH03-9_grd345vein@19.asc | 0.42  | 0.53 | chb    | -1558 | 7828 | grd3    | BH-03-9  | 12 | NaN |
| BH03-9_grd345vein@20.asc | 0.22  | 0.55 | carb?  | -1558 | 8153 | grd3    | BH-03-9  | 13 | NaN |
| BH03-9_grd345vein@21.asc | 1.60  | 0.69 | carb?  | -2058 | 8153 | grd3    | BH-03-9  | 14 | NaN |
| BH03-9_grd345vein@22.asc | 0.09  | 0.50 | carb?  | -2558 | 8153 | grd3    | BH-03-9  | 15 | NaN |
| BH03-9_grd345vein@23.asc | 0.36  | 0.52 | carb?  | -3058 | 8153 | grd3    | BH-03-9  | 16 | NaN |
| BH03-9_grd345vein@27.asc | 0.83  | 0.64 | carb   | 1536  | 8594 | grd4    | BH-03-9  | 1  | NaN |
| BH03-9_grd345vein@28.asc | -1.46 | 0.99 | carb   | 1802  | 8594 | grd4    | BH-03-9  | 2  | NaN |
| BH03-9_grd345vein@29.asc | 0.69  | 0.87 | carb   | 2069  | 8594 | grd4    | BH-03-9  | 3  | NaN |
| BH03-9_grd345vein@30.asc | 1.28  | 0.48 | carb   | 2336  | 8594 | grd4    | BH-03-9  | 4  | NaN |
| BH03-9_grd345vein@31.asc | -2.06 | 1.03 | carb   | 2336  | 8794 | grd4    | BH-03-9  | 5  | NaN |
| BH03-9_grd345vein@32.asc | -1.39 | 0.89 | carb   | 2069  | 8794 | grd4    | BH-03-9  | 6  | NaN |
| BH03-9_grd345vein@33.asc | 3.04  | 1.16 | carb   | 1802  | 8794 | grd4    | BH-03-9  | 7  | NaN |
| BH03-9_grd345vein@34.asc | 3.42  | 0.68 | carb   | 1536  | 8794 | grd4    | BH-03-9  | 8  | NaN |
| BH03-9_grd345vein@35.asc | -0.89 | 2.02 | carb   | 1536  | 8994 | grd4    | BH-03-9  | 9  | NaN |
| BRC01-2_grd1@1.asc       | 0.28  | 0.25 | chb    | 2054  | 1252 | grd1    | BRC-01-2 | 1  | NaN |
| BRC01-2_grd1@2.asc       | 0.46  | 0.20 | chb    | 2637  | 1252 | grd1    | BRC-01-2 | 2  | NaN |
| BRC01-2_grd1@3.asc       | -0.48 | 0.19 | chb    | 3220  | 1252 | grd1    | BRC-01-2 | 3  | NaN |
| BRC01-2_grd1@4.asc       | -0.81 | 0.23 | cement | 3804  | 1252 | grd1    | BRC-01-2 | 4  | NaN |
| BRC01-2_grd1@5.asc       | -0.67 | 0.18 | cement | 3804  | 1634 | grd1    | BRC-01-2 | 5  | NaN |
| BRC01-2_grd1@6.asc       | -0.48 | 0.20 | chb    | 3220  | 1634 | grd1    | BRC-01-2 | 6  | NaN |
| BRC01-2_grd1@7.asc       | 0.17  | 0.19 | chb    | 2637  | 1634 | grd1    | BRC-01-2 | 7  | NaN |
| BRC01-2_grd1@8.asc       | 0.04  | 0.28 | chb    | 2054  | 1634 | grd1    | BRC-01-2 | 8  | NaN |
| BRC01-2_grd1@9.asc       | -0.87 | 0.25 | chb    | 2054  | 2017 | grd1    | BRC-01-2 | 9  | NaN |
| BRC01-2_grd1@10.asc      | 0.78  | 0.19 | chb    | 2637  | 2017 | grd1    | BRC-01-2 | 10 | NaN |
| BRC01-2_grd1@11.asc      | -0.24 | 0.22 | cement | 3220  | 2017 | grd1    | BRC-01-2 | 11 | NaN |
| BRC01-2_grd1@12.asc      | -1.09 | 0.22 | cement | 3804  | 2017 | grd1    | BRC-01-2 | 12 | NaN |
| BRC01-2_grd1@13.asc      | -0.40 | 0.24 | cement | 3804  | 2399 | grd1    | BRC-01-2 | 13 | NaN |
| BRC01-2_grd1@14.asc      | -0.93 | 0.27 | cement | 3220  | 2399 | grd1    | BRC-01-2 | 14 | NaN |
| BRC01-2_grd1@15.asc      | -0.31 | 0.29 | cement | 2637  | 2399 | grd1    | BRC-01-2 | 15 | NaN |
| BRC01-2_grd1@16.asc      | -0.68 | 0.23 | cement | 2054  | 2399 | grd1    | BRC-01-2 | 16 | NaN |
| BRC01-2_grd2@1.asc       | -1.44 | 0.22 | cement | -7176 | 1678 | grd2    | BRC-01-2 | 1  | NaN |
| BRC01-2_grd2@2.asc       | 0.39  | 0.29 | chb    | -6540 | 1678 | grd2    | BRC-01-2 | 2  | NaN |
| BRC01-2_grd2@3.asc       | -2.34 | 0.25 | cement | -5903 | 1678 | grd2    | BRC-01-2 | 3  | NaN |
| BRC01-2_grd2@4.asc       | 0.28  | 0.28 | cement | -5266 | 1678 | grd2    | BRC-01-2 | 4  | NaN |

|                      |       |      |        |       |       |      |          |    |       |
|----------------------|-------|------|--------|-------|-------|------|----------|----|-------|
| BRC01-2_grd2@5.asc   | -0.09 | 0.23 | chb    | -5266 | 2070  | grd2 | BRC-01-2 | 5  | NaN   |
| BRC01-2_grd2@6.asc   | -0.75 | 0.26 | cement | -5903 | 2070  | grd2 | BRC-01-2 | 6  | NaN   |
| BRC01-2_grd2@7.asc   | -0.88 | 0.27 | chb    | -6540 | 2070  | grd2 | BRC-01-2 | 7  | NaN   |
| BRC01-2_grd2@8.asc   | 1.10  | 0.24 | chb    | -7176 | 2070  | grd2 | BRC-01-2 | 8  | NaN   |
| BRC01-2_grd2@9.asc   | -0.49 | 0.23 | chb    | -7176 | 2463  | grd2 | BRC-01-2 | 9  | NaN   |
| BRC01-2_grd2@10.asc  | -1.95 | 0.21 | chb    | -6540 | 2463  | grd2 | BRC-01-2 | 10 | NaN   |
| BRC01-2_grd2@11.asc  | -1.41 | 0.43 | chb    | -5903 | 2463  | grd2 | BRC-01-2 | 11 | NaN   |
| BRC01-2_grd2@12.asc  | -1.33 | 0.25 | cement | -5266 | 2463  | grd2 | BRC-01-2 | 12 | NaN   |
| BRC01-2_grd2@13.asc  | -1.91 | 0.23 | chb    | -5266 | 2856  | grd2 | BRC-01-2 | 13 | NaN   |
| BRC01-2_grd2@14.asc  | 0.29  | 0.44 | chb    | -5903 | 2856  | grd2 | BRC-01-2 | 14 | NaN   |
| BRC01-2_grd2@15.asc  | 1.21  | 0.17 | chb    | -6540 | 2856  | grd2 | BRC-01-2 | 15 | NaN   |
| BRC01-2_grd2@16.asc  | 0.30  | 0.31 | chb    | -7176 | 2856  | grd2 | BRC-01-2 | 16 | NaN   |
| BRC01-2_grd34@1.asc  | 0.94  | 0.28 | carb   | -4750 | 7639  | grd3 | BRC-01-2 | 1  | NaN   |
| BRC01-2_grd34@2.asc  | 1.09  | 0.20 | carb   | -4650 | 7639  | grd3 | BRC-01-2 | 2  | NaN   |
| BRC01-2_grd34@3.asc  | 0.98  | 0.31 | carb   | -4550 | 7639  | grd3 | BRC-01-2 | 3  | NaN   |
| BRC01-2_grd34@4.asc  | 0.44  | 0.32 | carb   | -4550 | 7739  | grd3 | BRC-01-2 | 4  | NaN   |
| BRC01-2_grd34@5.asc  | 0.21  | 0.26 | carb   | -4650 | 7739  | grd3 | BRC-01-2 | 5  | NaN   |
| BRC01-2_grd34@6.asc  | 0.62  | 0.21 | carb   | -4750 | 7739  | grd3 | BRC-01-2 | 6  | NaN   |
| BRC01-2_grd34@7.asc  | 0.94  | 0.22 | carb   | -4750 | 7839  | grd3 | BRC-01-2 | 7  | NaN   |
| BRC01-2_grd34@8.asc  | 1.38  | 0.18 | carb   | -4650 | 7839  | grd3 | BRC-01-2 | 8  | NaN   |
| BRC01-2_grd34@9.asc  | 1.06  | 0.19 | carb   | -4550 | 7839  | grd3 | BRC-01-2 | 9  | NaN   |
| BRC01-2_grd34@10.asc | 0.05  | 0.20 | cement | 650   | 7431  | grd3 | BRC-01-2 | 10 | NaN   |
| BRC01-2_grd34@11.asc | 0.58  | 0.18 | cement | 606   | 7013  | grd3 | BRC-01-2 | 11 | NaN   |
| BRC01-2_grd34@12.asc | 0.30  | 0.18 | cement | 349   | 6381  | grd3 | BRC-01-2 | 12 | NaN   |
| BRC01-2_grd34@13.asc | -2.46 | 0.18 | cement | -428  | NaN   | grd3 | BRC-01-2 | 13 | NaN   |
| BRC01-2_grd34@17.asc | -1.83 | 0.19 | chb    | -6960 | -4463 | grd4 | BRC-01-2 | 1  | NaN   |
| BRC01-2_grd34@18.asc | -2.25 | 0.18 | chb    | -6860 | -4463 | grd4 | BRC-01-2 | 2  | NaN   |
| BRC01-2_grd34@19.asc | -2.66 | 0.17 | chb    | -6860 | -4050 | grd4 | BRC-01-2 | 3  | NaN   |
| BRC01-2_grd34@20.asc | -0.39 | 0.21 | chb    | -6960 | -4050 | grd4 | BRC-01-2 | 4  | NaN   |
| BRC01-2_grd34@21.asc | 0.71  | 0.19 | carb   | -6960 | -3637 | grd4 | BRC-01-2 | 5  | NaN   |
| BRC01-2_grd34@22.asc | -0.61 | 0.19 | carb   | -6860 | -3637 | grd4 | BRC-01-2 | 6  | NaN   |
| BRC01-2_grd34@23.asc | 0.58  | 0.18 | carb   | -6860 | -3223 | grd4 | BRC-01-2 | 7  | NaN   |
| BRC01-2_grd34@24.asc | 0.23  | 0.21 | carb   | -6960 | -3223 | grd4 | BRC-01-2 | 8  | NaN   |
| BRC01-2_grd34@25.asc | 0.17  | 0.18 | carb   | -6960 | -2810 | grd4 | BRC-01-2 | 9  | NaN   |
| BRC01-2_grd34@26.asc | 0.98  | 0.19 | carb   | -6860 | -2810 | grd4 | BRC-01-2 | 10 | NaN   |
| BRC01-2_grd34@27.asc | 0.05  | 0.21 | chb    | -6860 | -2397 | grd4 | BRC-01-2 | 11 | NaN   |
| BRC01-2_grd34@28.asc | 0.59  | 0.22 | chb    | -6960 | -2397 | grd4 | BRC-01-2 | 12 | NaN   |
| BRC01-2_grd34@29.asc | 0.70  | 0.25 | chb    | -6960 | -1984 | grd4 | BRC-01-2 | 13 | NaN   |
| BRC01-2_grd34@30.asc | 0.61  | 0.20 | chb    | -6860 | -1984 | grd4 | BRC-01-2 | 14 | NaN   |
| BRC01-2_grd56@1.asc  | -1.80 | 0.21 | cement | -6939 | 1751  | grd5 | BRC-01-2 | 1  | Fig07 |
| BRC01-2_grd56@2.asc  | -0.70 | 0.18 | cement | -6839 | 1751  | grd5 | BRC-01-2 | 2  | Fig07 |
| BRC01-2_grd56@3.asc  | 0.05  | 0.20 | chb    | -6839 | 1857  | grd5 | BRC-01-2 | 3  | Fig07 |
| BRC01-2_grd56@4.asc  | 1.29  | 0.21 | chb    | -6939 | 1857  | grd5 | BRC-01-2 | 4  | Fig07 |
| BRC01-2_grd56@5.asc  | -0.56 | 0.16 | chb    | -6939 | 1964  | grd5 | BRC-01-2 | 5  | Fig07 |
| BRC01-2_grd56@6.asc  | -1.82 | 0.22 | chb    | -6839 | 1964  | grd5 | BRC-01-2 | 6  | Fig07 |
| BRC01-2_grd56@7.asc  | 0.52  | 0.24 | chb    | -6839 | 2071  | grd5 | BRC-01-2 | 7  | Fig07 |
| BRC01-2_grd56@8.asc  | -0.23 | 0.19 | chb    | -6939 | 2071  | grd5 | BRC-01-2 | 8  | Fig07 |

|                      |       |      |        |       |       |      |          |    |       |
|----------------------|-------|------|--------|-------|-------|------|----------|----|-------|
| BRC01-2_grd56@9.asc  | -2.01 | 0.18 | chb    | -6939 | 2178  | grd5 | BRC-01-2 | 9  | Fig07 |
| BRC01-2_grd56@10.asc | -0.15 | 0.16 | chb    | -6839 | 2178  | grd5 | BRC-01-2 | 10 | Fig07 |
| BRC01-2_grd56@11.asc | -1.38 | 0.21 | chb    | -6839 | 2285  | grd5 | BRC-01-2 | 11 | Fig07 |
| BRC01-2_grd56@12.asc | -1.94 | 0.19 | chb    | -6939 | 2285  | grd5 | BRC-01-2 | 12 | Fig07 |
| BRC01-2_grd56@13.asc | -2.03 | 0.18 | chb    | -6939 | 2391  | grd5 | BRC-01-2 | 13 | Fig07 |
| BRC01-2_grd56@14.asc | -1.72 | 0.21 | chb    | -6839 | 2391  | grd5 | BRC-01-2 | 14 | Fig07 |
| BRC01-2_grd56@15.asc | -0.68 | 0.24 | chb    | -6839 | 2497  | grd5 | BRC-01-2 | 15 | Fig07 |
| BRC01-2_grd56@19.asc | -0.06 | 0.16 | chb    | -6939 | 2497  | grd5 | BRC-01-2 | 16 | Fig07 |
| BRC01-2_grd56@20.asc | 1.04  | 0.22 | carb   | -6939 | 2604  | grd5 | BRC-01-2 | 17 | Fig07 |
| BRC01-2_grd56@21.asc | 1.04  | 0.23 | chb    | -6839 | 2604  | grd5 | BRC-01-2 | 18 | Fig07 |
| BRC01-2_grd56@22.asc | 0.53  | 0.21 | chb    | -6839 | 2711  | grd5 | BRC-01-2 | 19 | Fig07 |
| BRC01-2_grd56@23.asc | 1.32  | 0.22 | chb    | -6939 | 2711  | grd5 | BRC-01-2 | 20 | Fig07 |
| BRC01-2_grd56@24.asc | 0.92  | 0.20 | chb    | -6939 | 2818  | grd5 | BRC-01-2 | 21 | Fig07 |
| BRC01-2_grd56@25.asc | 1.17  | 0.23 | chb    | -6839 | 2818  | grd5 | BRC-01-2 | 22 | Fig07 |
| BRC01-2_grd56@26.asc | 0.93  | 0.15 | chb    | -6839 | 2924  | grd5 | BRC-01-2 | 23 | Fig07 |
| BRC01-2_grd56@27.asc | 1.56  | 0.25 | chb    | -6939 | 2924  | grd5 | BRC-01-2 | 24 | Fig07 |
| BRC01-2_grd56@28.asc | 0.77  | 0.21 | chb    | -6939 | 3031  | grd5 | BRC-01-2 | 25 | Fig07 |
| BRC01-2_grd56@29.asc | 1.38  | 0.26 | chb    | -6839 | 3031  | grd5 | BRC-01-2 | 26 | Fig07 |
| BRC01-2_grd56@30.asc | 1.33  | 0.22 | chb    | -6839 | 3138  | grd5 | BRC-01-2 | 27 | Fig07 |
| BRC01-2_grd56@31.asc | 1.48  | 0.18 | chb    | -6939 | 3138  | grd5 | BRC-01-2 | 28 | Fig07 |
| BRC01-2_grd56@32.asc | 1.87  | 0.28 | chb    | -6939 | 3244  | grd5 | BRC-01-2 | 29 | Fig07 |
| BRC01-2_grd56@33.asc | 0.17  | 0.31 | chb    | -6839 | 3244  | grd5 | BRC-01-2 | 30 | Fig07 |
| BRC01-2_grd56@37.asc | -0.41 | 0.25 | cement | 808   | -6608 | grd6 | BRC-01-2 | 1  | NaN   |
| BRC01-2_grd56@38.asc | 0.33  | 0.22 | cement | 1058  | -6608 | grd6 | BRC-01-2 | 2  | NaN   |
| BRC01-2_grd56@39.asc | -0.04 | 0.27 | cement | 1308  | -6608 | grd6 | BRC-01-2 | 3  | NaN   |
| BRC01-2_grd56@40.asc | -0.52 | 0.25 | carb   | 1558  | -6608 | grd6 | BRC-01-2 | 4  | NaN   |
| BRC01-2_grd56@41.asc | -0.25 | 0.31 | cement | 1558  | -6258 | grd6 | BRC-01-2 | 5  | NaN   |
| BRC01-2_grd56@42.asc | -0.59 | 0.33 | cement | 1308  | -6258 | grd6 | BRC-01-2 | 6  | NaN   |
| BRC01-2_grd56@43.asc | 0.15  | 0.31 | cement | 1058  | -6258 | grd6 | BRC-01-2 | 7  | NaN   |
| BRC01-2_grd56@44.asc | -0.53 | 0.33 | chb    | 808   | -6258 | grd6 | BRC-01-2 | 8  | NaN   |
| BRC01-2_grd56@45.asc | 0.33  | 0.29 | chb    | 808   | -6008 | grd6 | BRC-01-2 | 9  | NaN   |
| BRC01-2_grd56@46.asc | 0.77  | 0.25 | chb    | 1058  | -6008 | grd6 | BRC-01-2 | 10 | NaN   |
| BRC01-2_grd56@47.asc | -0.25 | 0.32 | chb    | 1308  | -6008 | grd6 | BRC-01-2 | 11 | NaN   |
| BRC01-2_grd56@48.asc | -0.91 | 0.27 | cement | 1558  | -6008 | grd6 | BRC-01-2 | 12 | NaN   |
| BRC01-2_grd56@49.asc | -0.35 | 0.26 | chb    | 1558  | -5758 | grd6 | BRC-01-2 | 13 | NaN   |
| BRC01-2_grd56@50.asc | 0.07  | 0.34 | chb    | 1308  | -5758 | grd6 | BRC-01-2 | 14 | NaN   |
| BRC01-2_grd56@51.asc | 0.11  | 0.23 | chb    | 1058  | -5758 | grd6 | BRC-01-2 | 15 | NaN   |
| BRC01-2_grd56@52.asc | -0.27 | 0.23 | chb    | 808   | -5758 | grd6 | BRC-01-2 | 16 | NaN   |
| BRC01-2_grd7@4.asc   | -0.63 | 0.22 | cement | 2507  | -1356 | grd7 | BRC-01-2 | 1  | NaN   |
| BRC01-2_grd7@5.asc   | -1.36 | 0.21 | cement | 2795  | NaN   | grd7 | BRC-01-2 | 2  | NaN   |
| BRC01-2_grd7@6.asc   | -2.15 | 0.22 | cement | 3130  | -1391 | grd7 | BRC-01-2 | 3  | NaN   |
| BRC01-2_grd7@7.asc   | -0.63 | 0.17 | cement | 3348  | NaN   | grd7 | BRC-01-2 | 4  | NaN   |
| BRC01-2_grd7@8.asc   | -0.63 | 0.20 | cement | 3007  | NaN   | grd7 | BRC-01-2 | 5  | NaN   |
| BRC01-2_grd7@9.asc   | -0.59 | 0.21 | cement | 3260  | NaN   | grd7 | BRC-01-2 | 6  | NaN   |
| BRC01-2_grd7@10.asc  | -0.97 | 0.20 | cement | 3471  | NaN   | grd7 | BRC-01-2 | 7  | NaN   |
| BRC01-2_grd7@11.asc  | -1.36 | 0.14 | chb    | 2424  | -499  | grd7 | BRC-01-2 | 8  | NaN   |
| BRC01-2_grd7@12.asc  | -0.18 | 0.15 | chb    | 2624  | -499  | grd7 | BRC-01-2 | 9  | NaN   |

|                       |       |      |        |       |       |           |          |    |       |
|-----------------------|-------|------|--------|-------|-------|-----------|----------|----|-------|
| BRC01-2_grd7@13.asc   | -0.31 | 0.16 | chb    | 2824  | -499  | grd7      | BRC-01-2 | 10 | NaN   |
| BRC01-2_grd7@14.asc   | -0.25 | 0.21 | chb    | 2824  | -299  | grd7      | BRC-01-2 | 11 | NaN   |
| BRC01-2_grd7@15.asc   | -0.17 | 0.16 | chb    | 2624  | -299  | grd7      | BRC-01-2 | 12 | NaN   |
| BRC01-2_grd7@16.asc   | 0.56  | 0.19 | chb    | 2424  | -299  | grd7      | BRC-01-2 | 13 | NaN   |
| BRC01-2_grd7@17.asc   | -0.11 | 0.22 | chb    | 2424  | -99   | grd7      | BRC-01-2 | 14 | NaN   |
| BRC01-2_grd7@18.asc   | -0.07 | 0.21 | chb    | 2624  | -99   | grd7      | BRC-01-2 | 15 | NaN   |
| BRC01-2_grd7@19.asc   | -0.47 | 0.18 | chb    | 2824  | -99   | grd7      | BRC-01-2 | 16 | NaN   |
| BRC01-2_cement@1.asc  | -1.10 | 0.20 | cement | -5712 | NaN   | grdcement | BRC-01-2 | 1  | Fig06 |
| BRC01-2_cement@2.asc  | 0.16  | 0.17 | cement | -5449 | -1744 | grdcement | BRC-01-2 | 2  | Fig06 |
| BRC01-2_cement@3.asc  | 0.34  | 0.19 | cement | -5278 | -1771 | grdcement | BRC-01-2 | 3  | Fig06 |
| BRC01-2_cement@4.asc  | 0.91  | 0.18 | cement | -4844 | -1857 | grdcement | BRC-01-2 | 4  | Fig06 |
| BRC01-2_cement@5.asc  | 0.49  | 0.18 | cement | -4546 | NaN   | grdcement | BRC-01-2 | 5  | Fig06 |
| BRC01-2_cement@6.asc  | 0.00  | 0.21 | cement | -4154 | -2036 | grdcement | BRC-01-2 | 6  | Fig06 |
| BRC01-2_cement@7.asc  | 0.67  | 0.17 | cement | -4508 | -2848 | grdcement | BRC-01-2 | 7  | Fig06 |
| BRC01-2_cement@8.asc  | 0.28  | 0.19 | cement | -4743 | NaN   | grdcement | BRC-01-2 | 8  | Fig06 |
| BRC01-2_cement@9.asc  | -0.04 | 0.19 | cement | -5319 | NaN   | grdcement | BRC-01-2 | 9  | Fig06 |
| BRC01-2_cement@10.asc | 0.24  | 0.16 | cement | -5880 | -4898 | grdcement | BRC-01-2 | 10 | Fig06 |
| BRC01-2_grd8@1.asc    | -0.83 | 0.25 | cement | 1420  | -772  | grd8      | BRC-01-2 | 1  | NaN   |
| BRC01-2_grd8@2.asc    | -2.09 | 0.22 | cement | 1520  | -772  | grd8      | BRC-01-2 | 2  | NaN   |
| BRC01-2_grd8@3.asc    | -0.12 | 0.23 | cement | 1520  | -568  | grd8      | BRC-01-2 | 3  | NaN   |
| BRC01-2_grd8@4.asc    | 0.91  | 0.25 | chb    | 1420  | -568  | grd8      | BRC-01-2 | 4  | NaN   |
| BRC01-2_grd8@5.asc    | 0.38  | 0.25 | chb    | 1420  | -363  | grd8      | BRC-01-2 | 5  | NaN   |
| BRC01-2_grd8@6.asc    | 0.67  | 0.23 | chb    | 1520  | -363  | grd8      | BRC-01-2 | 6  | NaN   |
| BRC01-2_grd8@7.asc    | 0.32  | 0.22 | chb    | 1520  | -159  | grd8      | BRC-01-2 | 7  | NaN   |
| BRC01-2_grd8@8.asc    | 0.42  | 0.23 | chb    | 1420  | -159  | grd8      | BRC-01-2 | 8  | NaN   |
| BRC01-2_grd8@9.asc    | 0.42  | 0.35 | chb    | 1420  | 45    | grd8      | BRC-01-2 | 9  | NaN   |
| BRC01-2_grd8@10.asc   | 0.41  | 0.24 | chb    | 1520  | 45    | grd8      | BRC-01-2 | 10 | NaN   |
| BRC01-2_grd8@11.asc   | 0.42  | 0.26 | chb    | 1520  | 250   | grd8      | BRC-01-2 | 11 | NaN   |
| BRC01-2_grd8@12.asc   | 0.82  | 0.25 | chb    | 1420  | 250   | grd8      | BRC-01-2 | 12 | NaN   |
| BRC01-2_grd8@13.asc   | 0.71  | 0.24 | chb    | 1420  | 455   | grd8      | BRC-01-2 | 13 | NaN   |
| BRC01-2_grd8@14.asc   | 1.35  | 0.26 | chb    | 1520  | 455   | grd8      | BRC-01-2 | 14 | NaN   |
| BRC01-2_grd8@15.asc   | 1.07  | 0.26 | chb    | 1520  | 660   | grd8      | BRC-01-2 | 15 | NaN   |
| BRC01-2_grd8@19.asc   | 0.49  | 0.28 | chb    | 1420  | 660   | grd8      | BRC-01-2 | 16 | NaN   |
| BRC01-2_grd8@20.asc   | 0.73  | 0.28 | chb    | 1420  | 863   | grd8      | BRC-01-2 | 17 | NaN   |
| BRC01-2_grd8@21.asc   | 0.93  | 0.31 | chb    | 1520  | 863   | grd8      | BRC-01-2 | 18 | NaN   |
| BRC01-2_grd8@22.asc   | 0.37  | 0.26 | chb    | 1520  | 1068  | grd8      | BRC-01-2 | 19 | NaN   |
| BRC01-2_grd8@23.asc   | 0.56  | 0.28 | chb    | 1420  | 1068  | grd8      | BRC-01-2 | 20 | NaN   |
| BRC01-2_grd8@24.asc   | 0.68  | 0.27 | chb    | 1420  | 1272  | grd8      | BRC-01-2 | 21 | NaN   |
| BRC01-2_grd8@25.asc   | 0.26  | 0.41 | chb    | 1520  | 1272  | grd8      | BRC-01-2 | 22 | NaN   |
| BRC01-2_grd8@26.asc   | 1.25  | 0.26 | chb    | 1520  | 1476  | grd8      | BRC-01-2 | 23 | NaN   |
| BRC01-2_grd8@27.asc   | 0.13  | 0.28 | chb    | 1420  | 1476  | grd8      | BRC-01-2 | 24 | NaN   |
| BRC01-2_grd8@28.asc   | 0.26  | 0.26 | chb    | 1420  | 1680  | grd8      | BRC-01-2 | 25 | NaN   |
| BRC01-2_grd8@29.asc   | 0.38  | 0.26 | chb    | 1520  | 1680  | grd8      | BRC-01-2 | 26 | NaN   |
| BRC01-2_grd8@30.asc   | 0.70  | 0.28 | chb    | 1520  | 1885  | grd8      | BRC-01-2 | 27 | NaN   |
| BRC01-2_grd8@31.asc   | 1.14  | 0.27 | chb    | 1420  | 1885  | grd8      | BRC-01-2 | 28 | NaN   |
| BRC01-2_grd8@32.asc   | -0.21 | 0.31 | cement | 1420  | 2090  | grd8      | BRC-01-2 | 29 | NaN   |
| BRC01-2_grd8@33.asc   | 0.41  | 0.28 | chb    | 1520  | 2089  | grd8      | BRC-01-2 | 30 | NaN   |

|                    |       |      |      |       |       |       |         |    |       |
|--------------------|-------|------|------|-------|-------|-------|---------|----|-------|
| BH037_grd2b@2.asc  | -0.23 | 0.24 | chb  | 369   | 6900  | grd2b | BH-03-7 | 1  | Fig08 |
| BH037_grd2b@3.asc  | -1.50 | 0.32 | chb  | 554   | 6900  | grd2b | BH-03-7 | 2  | Fig08 |
| BH037_grd2b@4.asc  | -0.18 | 0.34 | carb | 739   | 6900  | grd2b | BH-03-7 | 3  | Fig08 |
| BH037_grd2b@5.asc  | 0.23  | 0.26 | carb | 926   | 6900  | grd2b | BH-03-7 | 4  | Fig08 |
| BH037_grd2b@6.asc  | 0.47  | 0.34 | carb | 1111  | 6900  | grd2b | BH-03-7 | 5  | Fig08 |
| BH037_grd2b@7.asc  | 1.27  | 0.29 | carb | 1298  | 6900  | grd2b | BH-03-7 | 6  | Fig08 |
| BH037_grd2b@8.asc  | 0.45  | 0.26 | vein | 1483  | 6900  | grd2b | BH-03-7 | 7  | Fig08 |
| BH037_grd2b@9.asc  | -0.11 | 0.26 | carb | 1669  | 6900  | grd2b | BH-03-7 | 8  | Fig08 |
| BH037_grd2b@10.asc | -0.53 | 0.27 | carb | 1669  | 7000  | grd2b | BH-03-7 | 9  | Fig08 |
| BH037_grd2b@11.asc | 0.23  | 0.24 | carb | 1483  | 7000  | grd2b | BH-03-7 | 10 | Fig08 |
| BH037_grd2b@12.asc | -0.51 | 0.34 | vein | 1297  | 7000  | grd2b | BH-03-7 | 11 | Fig08 |
| BH037_grd2b@13.asc | 0.09  | 0.34 | carb | 1111  | 7000  | grd2b | BH-03-7 | 12 | Fig08 |
| BH037_grd2b@14.asc | 0.35  | 0.27 | carb | 926   | 7000  | grd2b | BH-03-7 | 13 | Fig08 |
| BH037_grd2b@15.asc | 0.28  | 0.28 | carb | 740   | 7000  | grd2b | BH-03-7 | 14 | Fig08 |
| BH037_grd2b@16.asc | 0.45  | 0.30 | carb | 554   | 7000  | grd2b | BH-03-7 | 15 | Fig08 |
| BH037_grd2b@17.asc | -2.37 | 0.30 | chb  | 370   | 7000  | grd2b | BH-03-7 | 16 | Fig08 |
| BH037_grd3b@1.asc  | -0.16 | 0.31 | chb  | 956   | -4760 | grd3b | BH-03-7 | 1  | NaN   |
| BH037_grd3b@2.asc  | 0.66  | 0.29 | chb  | 1056  | -4760 | grd3b | BH-03-7 | 2  | NaN   |
| BH037_grd3b@3.asc  | 0.47  | 0.33 | chb  | 1056  | -4415 | grd3b | BH-03-7 | 3  | NaN   |
| BH037_grd3b@4.asc  | 0.41  | 0.30 | chb  | 956   | -4416 | grd3b | BH-03-7 | 4  | NaN   |
| BH037_grd3b@5.asc  | -2.41 | 0.27 | chb  | 956   | -4070 | grd3b | BH-03-7 | 5  | NaN   |
| BH037_grd3b@6.asc  | 0.04  | 0.26 | chb  | 1056  | -4070 | grd3b | BH-03-7 | 6  | NaN   |
| BH037_grd3b@7.asc  | 0.67  | 0.38 | chg  | 1056  | -3724 | grd3b | BH-03-7 | 7  | NaN   |
| BH037_grd3b@8.asc  | 0.29  | 0.29 | chg  | 956   | -3724 | grd3b | BH-03-7 | 8  | NaN   |
| BH037_grd3b@9.asc  | 0.54  | 0.30 | carb | 956   | -3378 | grd3b | BH-03-7 | 9  | NaN   |
| BH037_grd3b@10.asc | 0.50  | 0.29 | carb | 1056  | -3378 | grd3b | BH-03-7 | 10 | NaN   |
| BH037_grd3b@11.asc | 0.69  | 0.34 | carb | 1056  | -3032 | grd3b | BH-03-7 | 11 | NaN   |
| BH037_grd3b@12.asc | 0.72  | 0.37 | carb | 956   | -3032 | grd3b | BH-03-7 | 12 | NaN   |
| BH037_grd3b@13.asc | -1.11 | 0.28 | chg  | 956   | -2686 | grd3b | BH-03-7 | 13 | NaN   |
| BH037_grd3b@14.asc | -0.80 | 0.29 | chg  | 1056  | -2686 | grd3b | BH-03-7 | 14 | NaN   |
| BH037_grd3b@15.asc | -1.32 | 0.32 | chg  | 1056  | -2341 | grd3b | BH-03-7 | 15 | NaN   |
| BH037_grd3b@16.asc | -0.57 | 0.28 | chg  | 956   | -2342 | grd3b | BH-03-7 | 16 | NaN   |
| BH037_grd3b@17.asc | 0.89  | 0.31 | chb  | 956   | -1998 | grd3b | BH-03-7 | 17 | NaN   |
| BH037_grd3b@18.asc | 0.40  | 0.33 | chb  | 1056  | -1998 | grd3b | BH-03-7 | 18 | NaN   |
| BH039_grd6b@19.asc | 1.75  | 0.28 | chb  | -3643 | 5846  | grd6b | BH-03-9 | 16 | NaN   |
| BH039_grd6b@20.asc | 1.53  | 0.35 | chb  | -3643 | 5953  | grd6b | BH-03-9 | 17 | NaN   |
| BH039_grd6b@21.asc | 1.23  | 0.24 | chb  | -3543 | 5953  | grd6b | BH-03-9 | 18 | NaN   |
| BH039_grd6b@22.asc | 1.61  | 0.28 | chb  | -3543 | 6060  | grd6b | BH-03-9 | 19 | NaN   |
| BH039_grd6b@23.asc | 1.38  | 0.29 | chb  | -3643 | 6060  | grd6b | BH-03-9 | 20 | NaN   |
| BH039_grd6b@24.asc | 1.10  | 0.33 | chb  | -3643 | 6166  | grd6b | BH-03-9 | 21 | NaN   |
| BH039_grd6b@25.asc | 0.84  | 0.31 | chb  | -3543 | 6166  | grd6b | BH-03-9 | 22 | NaN   |
| BH039_grd6b@26.asc | 0.71  | 0.30 | chb  | -3543 | 6273  | grd6b | BH-03-9 | 23 | NaN   |
| BH039_grd6b@27.asc | 1.15  | 0.31 | chb  | -3643 | 6273  | grd6b | BH-03-9 | 24 | NaN   |
| BH039_grd6b@28.asc | 1.79  | 0.28 | chb  | -3643 | 6380  | grd6b | BH-03-9 | 25 | NaN   |
| BH039_grd6b@29.asc | 2.40  | 0.25 | chb  | -3543 | 6380  | grd6b | BH-03-9 | 26 | NaN   |
| BH039_grd6b@30.asc | 0.57  | 0.37 | chb  | -3543 | 6487  | grd6b | BH-03-9 | 27 | NaN   |
| BH039_grd6b@31.asc | 1.15  | 0.26 | chb  | -3643 | 6487  | grd6b | BH-03-9 | 28 | NaN   |

|                    |       |      |        |       |       |       |         |    |     |
|--------------------|-------|------|--------|-------|-------|-------|---------|----|-----|
| BH039_grd6b@32.asc | 0.20  | 0.40 | chb    | -3643 | 6593  | grd6b | BH-03-9 | 29 | NaN |
| BH039_grd6b@33.asc | 1.24  | 0.36 | chb    | -3543 | 6593  | grd6b | BH-03-9 | 30 | NaN |
| BH039_grd9b@1.asc  | 0.46  | 0.31 | chb    | -3170 | -3762 | grd9b | BH-03-9 | 1  | NaN |
| BH039_grd9b@2.asc  | -0.39 | 0.41 | chb    | -3070 | -3762 | grd9b | BH-03-9 | 2  | NaN |
| BH039_grd9b@3.asc  | -0.40 | 0.27 | chb    | -3070 | -3649 | grd9b | BH-03-9 | 3  | NaN |
| BH039_grd9b@4.asc  | 0.36  | 0.42 | chb    | -3170 | -3649 | grd9b | BH-03-9 | 4  | NaN |
| BH039_grd9b@5.asc  | -0.27 | 0.47 | cement | -3170 | -3537 | grd9b | BH-03-9 | 5  | NaN |
| BH039_grd9b@6.asc  | -0.83 | 0.51 | cement | -3070 | -3537 | grd9b | BH-03-9 | 6  | NaN |
| BH039_grd9b@7.asc  | -0.53 | 0.38 | cement | -3070 | -3425 | grd9b | BH-03-9 | 7  | NaN |
| BH039_grd9b@8.asc  | -0.76 | 0.30 | cement | -3170 | -3425 | grd9b | BH-03-9 | 8  | NaN |
| BH039_grd9b@9.asc  | -1.37 | 0.34 | chb    | -3170 | -3312 | grd9b | BH-03-9 | 9  | NaN |
| BH039_grd9b@10.asc | -0.64 | 0.29 | chb    | -3070 | -3312 | grd9b | BH-03-9 | 10 | NaN |
| BH039_grd9b@11.asc | -0.64 | 0.31 | chb    | -3070 | -3200 | grd9b | BH-03-9 | 11 | NaN |
| BH039_grd9b@12.asc | -1.18 | 0.29 | chb    | -3170 | -3200 | grd9b | BH-03-9 | 12 | NaN |
| BH039_grd9b@13.asc | 0.18  | 0.28 | carbb  | -3170 | -3087 | grd9b | BH-03-9 | 13 | NaN |
| BH039_grd9b@14.asc | -0.52 | 0.34 | carbb  | -3070 | -3087 | grd9b | BH-03-9 | 14 | NaN |
| BH039_grd9b@15.asc | 0.33  | 0.28 | carbb  | -3070 | -2974 | grd9b | BH-03-9 | 15 | NaN |
| BH039_grd9b@16.asc | 0.80  | 0.27 | carbb  | -3170 | -2974 | grd9b | BH-03-9 | 16 | NaN |
| BH039_grd10@1.asc  | 0.33  | 0.42 | chb    | -3190 | -2786 | grd10 | BH-03-9 | 1  | NaN |
| BH039_grd10@2.asc  | -0.10 | 0.33 | chb    | -3090 | -2786 | grd10 | BH-03-9 | 2  | NaN |
| BH039_grd10@3.asc  | -0.17 | 0.41 | chb    | -3090 | -2599 | grd10 | BH-03-9 | 3  | NaN |
| BH039_grd10@4.asc  | -0.94 | 0.31 | chb    | -3190 | -2599 | grd10 | BH-03-9 | 4  | NaN |
| BH039_grd10@5.asc  | -0.51 | 0.36 | chb    | -3190 | -2411 | grd10 | BH-03-9 | 5  | NaN |
| BH039_grd10@6.asc  | 0.42  | 0.39 | chb    | -3090 | -2411 | grd10 | BH-03-9 | 6  | NaN |
| BH039_grd10@7.asc  | 0.52  | 0.38 | chb    | -3090 | -2223 | grd10 | BH-03-9 | 7  | NaN |
| BH039_grd10@8.asc  | -0.42 | 0.24 | chb    | -3190 | -2223 | grd10 | BH-03-9 | 8  | NaN |
| BH039_grd10@9.asc  | -0.11 | 0.28 | chb    | -3190 | -1966 | grd10 | BH-03-9 | 9  | NaN |
| BH039_grd10@10.asc | 0.40  | 0.56 | chb    | -3090 | -1967 | grd10 | BH-03-9 | 10 | NaN |
| BH039_grd10@11.asc | -0.24 | 0.33 | chb    | -3090 | -1779 | grd10 | BH-03-9 | 11 | NaN |
| BH039_grd10@12.asc | 0.29  | 0.31 | chb    | -3190 | -1779 | grd10 | BH-03-9 | 12 | NaN |
| BH039_grd10@13.asc | 0.46  | 0.34 | chb    | -3190 | -1522 | grd10 | BH-03-9 | 13 | NaN |
| BH039_grd10@14.asc | 0.24  | 0.38 | chb    | -3090 | -1522 | grd10 | BH-03-9 | 14 | NaN |
| BH039_grd10@15.asc | 0.15  | 0.25 | chb    | -3090 | -1334 | grd10 | BH-03-9 | 15 | NaN |
| BH039_grd10@16.asc | 0.40  | 0.36 | chb    | -3190 | -1334 | grd10 | BH-03-9 | 16 | NaN |
| BH039_grd10@17.asc | 0.06  | 0.35 | chb    | -3190 | -1077 | grd10 | BH-03-9 | 17 | NaN |
| BH039_grd10@18.asc | -0.10 | 0.27 | chb    | -3090 | -1077 | grd10 | BH-03-9 | 18 | NaN |
| BH039_grd11@1.asc  | 0.08  | 0.32 | chb    | -4008 | -854  | grd11 | BH-03-9 | 1  | NaN |
| BH039_grd11@2.asc  | 0.30  | 0.30 | chb    | -3908 | -854  | grd11 | BH-03-9 | 2  | NaN |
| BH039_grd11@3.asc  | 0.96  | 0.23 | chb    | -3908 | -639  | grd11 | BH-03-9 | 3  | NaN |
| BH039_grd11@4.asc  | 0.77  | 0.26 | chb    | -4008 | -639  | grd11 | BH-03-9 | 4  | NaN |
| BH039_grd11@5.asc  | 0.05  | 0.32 | chb    | -4008 | -424  | grd11 | BH-03-9 | 5  | NaN |
| BH039_grd11@6.asc  | 0.60  | 0.33 | chb    | -3908 | -425  | grd11 | BH-03-9 | 6  | NaN |
| BH039_grd11@7.asc  | 0.03  | 0.39 | chb    | -3908 | -210  | grd11 | BH-03-9 | 7  | NaN |
| BH039_grd11@8.asc  | 0.49  | 0.32 | chb    | -4008 | -210  | grd11 | BH-03-9 | 8  | NaN |
| BH039_grd11@9.asc  | 0.15  | 0.31 | chb    | -4008 | 5     | grd11 | BH-03-9 | 9  | NaN |
| BH039_grd11@10.asc | 0.38  | 0.30 | chb    | -3908 | 5     | grd11 | BH-03-9 | 10 | NaN |
| BH039_grd11@11.asc | 0.73  | 0.28 | chb    | -3908 | 220   | grd11 | BH-03-9 | 11 | NaN |

|                    |       |      |     |       |      |       |         |    |     |
|--------------------|-------|------|-----|-------|------|-------|---------|----|-----|
| BH039_grd11@12.asc | 0.80  | 0.32 | chb | -4008 | 220  | grd11 | BH-03-9 | 12 | NaN |
| BH039_grd11@13.asc | -0.40 | 0.47 | chb | -4008 | 434  | grd11 | BH-03-9 | 13 | NaN |
| BH039_grd11@14.asc | 0.00  | 0.32 | chb | -3908 | 434  | grd11 | BH-03-9 | 14 | NaN |
| BH039_grd11@15.asc | -0.71 | 0.34 | chb | -3908 | 649  | grd11 | BH-03-9 | 15 | NaN |
| BH039_grd11@16.asc | 0.80  | 0.40 | chb | -4008 | 649  | grd11 | BH-03-9 | 16 | NaN |
| BH039_grd11@17.asc | 0.30  | 0.35 | chb | -4008 | 865  | grd11 | BH-03-9 | 17 | NaN |
| BH039_grd11@18.asc | -0.32 | 0.29 | chb | -3908 | 865  | grd11 | BH-03-9 | 18 | NaN |
| BH039_grd11@22.asc | 0.25  | 0.40 | chb | -3908 | 1080 | grd11 | BH-03-9 | 19 | NaN |
| BH039_grd11@23.asc | 0.22  | 0.30 | chb | -4008 | 1080 | grd11 | BH-03-9 | 20 | NaN |
| BH039_grd11@24.asc | 0.23  | 0.33 | chb | -4008 | 1295 | grd11 | BH-03-9 | 21 | NaN |
| BH039_grd11@25.asc | 0.15  | 0.36 | chb | -3908 | 1295 | grd11 | BH-03-9 | 22 | NaN |
| BH039_grd11@26.asc | 0.40  | 0.34 | chb | -3908 | 1508 | grd11 | BH-03-9 | 23 | NaN |
| BH039_grd11@27.asc | -0.04 | 0.35 | chb | -4008 | 1508 | grd11 | BH-03-9 | 24 | NaN |
| BH039_grd11@28.asc | 0.09  | 0.28 | chb | -4008 | 1723 | grd11 | BH-03-9 | 25 | NaN |
| BH039_grd11@29.asc | 0.80  | 0.29 | chb | -3908 | 1723 | grd11 | BH-03-9 | 26 | NaN |
| BH039_grd11@30.asc | 0.04  | 0.32 | chb | -3908 | 1938 | grd11 | BH-03-9 | 27 | NaN |
| BH039_grd11@31.asc | 1.31  | 0.27 | chb | -4008 | 1938 | grd11 | BH-03-9 | 28 | NaN |
| BH039_grd11@32.asc | 0.75  | 0.34 | chb | -4008 | 2153 | grd11 | BH-03-9 | 29 | NaN |
| BH039_grd11@33.asc | 0.96  | 0.28 | chb | -3908 | 2153 | grd11 | BH-03-9 | 30 | NaN |
| BH039_grd11@34.asc | 0.70  | 0.41 | chb | -3908 | 2368 | grd11 | BH-03-9 | 31 | NaN |
| BH039_grd11@35.asc | 0.34  | 0.50 | chb | -4008 | 2368 | grd11 | BH-03-9 | 32 | NaN |
| BH039_grd11@36.asc | -0.38 | 0.63 | chb | -4008 | 2583 | grd11 | BH-03-9 | 33 | NaN |
| BH039_grd11@37.asc | 0.16  | 0.44 | chb | -3908 | 2583 | grd11 | BH-03-9 | 34 | NaN |
| BH039_grd11@38.asc | 0.42  | 0.32 | chb | -3908 | 2798 | grd11 | BH-03-9 | 35 | NaN |
| BH039_grd11@39.asc | 0.48  | 0.33 | chb | -4008 | 2798 | grd11 | BH-03-9 | 36 | NaN |
| BH039_grd11@43.asc | 1.28  | 0.25 | chb | -4008 | 3012 | grd11 | BH-03-9 | 37 | NaN |
| BH039_grd11@44.asc | 1.59  | 0.28 | chb | -3908 | 3012 | grd11 | BH-03-9 | 38 | NaN |
| BH039_grd11@45.asc | 1.14  | 0.25 | chb | -3908 | 3227 | grd11 | BH-03-9 | 39 | NaN |
| BH039_grd11@46.asc | 0.45  | 0.35 | chb | -4008 | 3227 | grd11 | BH-03-9 | 40 | NaN |
| BH039_grd11@47.asc | 0.94  | 0.37 | chb | -4008 | 3442 | grd11 | BH-03-9 | 41 | NaN |
| BH039_grd11@48.asc | 1.68  | 0.25 | chb | -3908 | 3442 | grd11 | BH-03-9 | 42 | NaN |
| BH039_grd11@49.asc | 0.92  | 0.40 | chb | -3908 | 3657 | grd11 | BH-03-9 | 43 | NaN |
| BH039_grd11@50.asc | 0.67  | 0.33 | chb | -4008 | 3657 | grd11 | BH-03-9 | 44 | NaN |
| BH039_grd11@51.asc | -0.32 | 0.36 | chb | -4008 | 3872 | grd11 | BH-03-9 | 45 | NaN |
| BH039_grd11@52.asc | 1.02  | 0.32 | chb | -3908 | 3872 | grd11 | BH-03-9 | 46 | NaN |
| BH039_grd11@53.asc | 1.00  | 0.40 | chb | -3908 | 4087 | grd11 | BH-03-9 | 47 | NaN |
| BH039_grd11@54.asc | 0.29  | 0.26 | chb | -4008 | 4087 | grd11 | BH-03-9 | 48 | NaN |
| BH039_grd11@55.asc | 0.38  | 0.23 | chb | -4008 | 4302 | grd11 | BH-03-9 | 49 | NaN |
| BH039_grd11@56.asc | 0.29  | 0.26 | chb | -3908 | 4302 | grd11 | BH-03-9 | 50 | NaN |
| BH039_grd11@57.asc | 0.63  | 0.39 | chb | -3908 | 4516 | grd11 | BH-03-9 | 51 | NaN |
| BH039_grd11@58.asc | 1.07  | 0.42 | chb | -4008 | 4516 | grd11 | BH-03-9 | 52 | NaN |
| BH039_grd11@59.asc | 0.67  | 0.27 | chb | -4008 | 4731 | grd11 | BH-03-9 | 53 | NaN |
| BH039_grd11@60.asc | 0.96  | 0.28 | chb | -3908 | 4731 | grd11 | BH-03-9 | 54 | NaN |
| BH039_grd8b@4.asc  | 1.46  | 0.33 | chb | -4289 | 6862 | grd8b | BH-03-9 | 1  | NaN |
| BH039_grd8b@5.asc  | 1.24  | 0.43 | chb | -4189 | 6862 | grd8b | BH-03-9 | 2  | NaN |
| BH039_grd8b@6.asc  | 0.35  | 0.33 | chb | -4189 | 7090 | grd8b | BH-03-9 | 3  | NaN |
| BH039_grd8b@7.asc  | 1.52  | 0.47 | chb | -4289 | 7090 | grd8b | BH-03-9 | 4  | NaN |

|                    |       |      |        |       |       |       |         |    |     |
|--------------------|-------|------|--------|-------|-------|-------|---------|----|-----|
| BH039_grd8b@8.asc  | 0.66  | 0.42 | chb    | -4289 | 7318  | grd8b | BH-03-9 | 5  | NaN |
| BH039_grd8b@9.asc  | 0.86  | 0.32 | chb    | -4189 | 7318  | grd8b | BH-03-9 | 6  | NaN |
| BH039_grd8b@10.asc | 1.15  | 0.30 | chb    | -4189 | 7546  | grd8b | BH-03-9 | 7  | NaN |
| BH039_grd8b@11.asc | 1.80  | 0.32 | chb    | -4289 | 7546  | grd8b | BH-03-9 | 8  | NaN |
| BH039_grd8b@12.asc | 0.95  | 0.34 | chb    | -4289 | 7774  | grd8b | BH-03-9 | 9  | NaN |
| BH039_grd8b@13.asc | 0.79  | 0.27 | chb    | -4189 | 7774  | grd8b | BH-03-9 | 10 | NaN |
| BH039_grd8b@14.asc | 1.15  | 0.23 | carb   | -4189 | 8002  | grd8b | BH-03-9 | 11 | NaN |
| BH039_grd8b@15.asc | 2.16  | 0.22 | vein   | -4289 | 8002  | grd8b | BH-03-9 | 12 | NaN |
| BH039_grd8b@16.asc | 1.57  | 0.28 | carb   | -4289 | 8230  | grd8b | BH-03-9 | 13 | NaN |
| BH039_grd8b@17.asc | 1.29  | 0.31 | carb   | -4189 | 8230  | grd8b | BH-03-9 | 14 | NaN |
| BH039_grd8b@18.asc | 1.02  | 0.39 | carb   | -4189 | 8459  | grd8b | BH-03-9 | 15 | NaN |
| BH039_grd8b@19.asc | 0.72  | 0.27 | carb   | -4289 | 8458  | grd8b | BH-03-9 | 16 | NaN |
| BH039_grd12@1.asc  | 0.31  | 0.32 | cement | -3180 | -6755 | grd12 | BH-03-9 | 1  | NaN |
| BH039_grd12@2.asc  | 0.67  | 0.48 | carb   | -3080 | -6755 | grd12 | BH-03-9 | 2  | NaN |
| BH039_grd12@3.asc  | 0.63  | 0.26 | carb   | -3080 | -6355 | grd12 | BH-03-9 | 3  | NaN |
| BH039_grd12@4.asc  | 1.12  | 0.39 | carb   | -3180 | -6355 | grd12 | BH-03-9 | 4  | NaN |
| BH039_grd12@5.asc  | 0.91  | 0.31 | chb    | -3180 | -5955 | grd12 | BH-03-9 | 5  | NaN |
| BH039_grd12@6.asc  | 1.48  | 0.24 | chb    | -3080 | -5955 | grd12 | BH-03-9 | 6  | NaN |
| BH039_grd12@7.asc  | 1.48  | 0.33 | carb   | -3080 | -5555 | grd12 | BH-03-9 | 7  | NaN |
| BH039_grd12@8.asc  | 0.77  | 0.27 | carb   | -3180 | -5555 | grd12 | BH-03-9 | 8  | NaN |
| BH039_grd12@9.asc  | 0.86  | 0.33 | chb    | -3180 | -5155 | grd12 | BH-03-9 | 9  | NaN |
| BH039_grd12@10.asc | 0.91  | 0.25 | chb    | -3080 | -5155 | grd12 | BH-03-9 | 10 | NaN |
| BH039_grd12@11.asc | 1.08  | 0.33 | chb    | -3080 | -4755 | grd12 | BH-03-9 | 11 | NaN |
| BH039_grd12@12.asc | 0.86  | 0.28 | chb    | -3180 | -4755 | grd12 | BH-03-9 | 12 | NaN |
| BH039_grd12@13.asc | 0.84  | 0.32 | chb    | -3180 | -4355 | grd12 | BH-03-9 | 13 | NaN |
| BH039_grd12@14.asc | 0.23  | 0.32 | chb    | -3080 | -4355 | grd12 | BH-03-9 | 14 | NaN |
| BH039_grd12@15.asc | 0.86  | 0.29 | chb    | -3080 | -3955 | grd12 | BH-03-9 | 15 | NaN |
| BH039_grd12@16.asc | 1.17  | 0.28 | chb    | -3180 | -3955 | grd12 | BH-03-9 | 16 | NaN |
| BH039_grd13@1.asc  | 0.51  | 0.30 | chb    | -4899 | 5218  | grd13 | BH-03-9 | 1  | NaN |
| BH039_grd13@2.asc  | 0.89  | 0.28 | chb    | -4699 | 5218  | grd13 | BH-03-9 | 2  | NaN |
| BH039_grd13@3.asc  | 1.13  | 0.26 | chb    | -4499 | 5218  | grd13 | BH-03-9 | 3  | NaN |
| BH039_grd13@4.asc  | 0.77  | 0.26 | chb    | -4299 | 5218  | grd13 | BH-03-9 | 4  | NaN |
| BH039_grd13@5.asc  | 0.80  | 0.23 | chb    | -4099 | 5218  | grd13 | BH-03-9 | 5  | NaN |
| BH039_grd13@6.asc  | 0.29  | 0.31 | chb    | -3899 | 5218  | grd13 | BH-03-9 | 6  | NaN |
| BH039_grd13@7.asc  | 0.50  | 0.26 | chb    | -3899 | 5498  | grd13 | BH-03-9 | 7  | NaN |
| BH039_grd13@8.asc  | 0.99  | 0.43 | chb    | -4099 | 5498  | grd13 | BH-03-9 | 8  | NaN |
| BH039_grd13@9.asc  | 1.05  | 0.30 | chb    | -4299 | 5498  | grd13 | BH-03-9 | 9  | NaN |
| BH039_grd13@10.asc | 0.89  | 0.37 | chb    | -4499 | 5498  | grd13 | BH-03-9 | 10 | NaN |
| BH039_grd13@11.asc | 1.19  | 0.52 | chb    | -4699 | 5498  | grd13 | BH-03-9 | 11 | NaN |
| BH039_grd13@12.asc | 0.40  | 0.33 | chb    | -4899 | 5498  | grd13 | BH-03-9 | 12 | NaN |
| BH039_grd13@13.asc | 0.48  | 0.31 | chb    | -4899 | 5778  | grd13 | BH-03-9 | 13 | NaN |
| BH039_grd13@14.asc | 0.23  | 0.36 | chb    | -4699 | 5778  | grd13 | BH-03-9 | 14 | NaN |
| BH039_grd13@15.asc | 1.24  | 0.41 | chb    | -4499 | 5778  | grd13 | BH-03-9 | 15 | NaN |
| BH039_grd13@16.asc | 0.68  | 0.35 | chb    | -4299 | 5778  | grd13 | BH-03-9 | 16 | NaN |
| BH039_grd13@17.asc | 0.41  | 0.24 | chb    | -4099 | 5778  | grd13 | BH-03-9 | 17 | NaN |
| BH039_grd13@18.asc | 0.93  | 0.24 | chb    | -3899 | 5778  | grd13 | BH-03-9 | 18 | NaN |
| BH039_grd13@22.asc | -0.10 | 0.25 | chb    | -3899 | 6058  | grd13 | BH-03-9 | 19 | NaN |



|                    |       |      |     |       |      |       |         |    |     |
|--------------------|-------|------|-----|-------|------|-------|---------|----|-----|
| BH039_grd13@23.asc | -0.05 | 0.25 | chb | -4099 | 6058 | grd13 | BH-03-9 | 20 | NaN |
| BH039_grd13@24.asc | -0.67 | 0.36 | chb | -4299 | 6058 | grd13 | BH-03-9 | 21 | NaN |
| BH039_grd13@25.asc | -0.44 | 0.47 | chb | -4499 | 6058 | grd13 | BH-03-9 | 22 | NaN |
| BH039_grd13@26.asc | -0.19 | 0.30 | chb | -4699 | 6058 | grd13 | BH-03-9 | 23 | NaN |
| BH039_grd13@27.asc | -0.32 | 0.28 | chb | -4899 | 6058 | grd13 | BH-03-9 | 24 | NaN |
| BH039_grd13@28.asc | 0.79  | 0.27 | chb | -4899 | 6338 | grd13 | BH-03-9 | 25 | NaN |
| BH039_grd13@29.asc | 0.77  | 0.37 | chb | -4699 | 6338 | grd13 | BH-03-9 | 26 | NaN |
| BH039_grd13@30.asc | 0.96  | 0.31 | chb | -4499 | 6338 | grd13 | BH-03-9 | 27 | NaN |
| BH039_grd13@31.asc | 0.49  | 0.27 | chb | -4299 | 6338 | grd13 | BH-03-9 | 28 | NaN |
| BH039_grd13@32.asc | 0.76  | 0.26 | chb | -4099 | 6338 | grd13 | BH-03-9 | 29 | NaN |
| BH039_grd13@33.asc | 0.42  | 0.28 | chb | -3899 | 6338 | grd13 | BH-03-9 | 30 | NaN |
| BH039_grd13@34.asc | 0.05  | 0.30 | chb | -3899 | 6618 | grd13 | BH-03-9 | 31 | NaN |
| BH039_grd13@35.asc | 0.20  | 0.25 | chb | -4099 | 6618 | grd13 | BH-03-9 | 32 | NaN |
| BH039_grd13@36.asc | 1.57  | 0.29 | chb | -4299 | 6618 | grd13 | BH-03-9 | 33 | NaN |
| BH039_grd13@37.asc | 0.85  | 0.35 | chb | -4499 | 6618 | grd13 | BH-03-9 | 34 | NaN |
| BH039_grd13@38.asc | 0.83  | 0.25 | chb | -4699 | 6618 | grd13 | BH-03-9 | 35 | NaN |
| BH039_grd13@39.asc | 0.82  | 0.27 | chb | -4899 | 6618 | grd13 | BH-03-9 | 36 | NaN |
| BH039_grd14@4.asc  | 0.91  | 0.31 | chb | -5018 | 6858 | grd14 | BH-03-9 | 1  | NaN |
| BH039_grd14@5.asc  | -2.80 | 0.29 | chb | -4918 | 6858 | grd14 | BH-03-9 | 2  | NaN |
| BH039_grd14@6.asc  | -3.38 | 0.43 | chb | -4818 | 6858 | grd14 | BH-03-9 | 3  | NaN |
| BH039_grd14@7.asc  | -1.18 | 0.29 | chb | -4718 | 6858 | grd14 | BH-03-9 | 4  | NaN |
| BH039_grd14@8.asc  | 0.57  | 0.28 | chb | -4618 | 6858 | grd14 | BH-03-9 | 5  | NaN |
| BH039_grd14@9.asc  | -0.08 | 0.29 | chb | -4518 | 6858 | grd14 | BH-03-9 | 6  | NaN |
| BH039_grd14@10.asc | -1.02 | 0.29 | chb | -4518 | 6958 | grd14 | BH-03-9 | 7  | NaN |
| BH039_grd14@11.asc | 0.17  | 0.30 | chb | -4618 | 6958 | grd14 | BH-03-9 | 8  | NaN |
| BH039_grd14@12.asc | 0.66  | 0.37 | chb | -4718 | 6958 | grd14 | BH-03-9 | 9  | NaN |
| BH039_grd14@13.asc | 0.45  | 0.27 | chb | -4818 | 6958 | grd14 | BH-03-9 | 10 | NaN |
| BH039_grd14@14.asc | 0.16  | 0.32 | chb | -4918 | 6958 | grd14 | BH-03-9 | 11 | NaN |
| BH039_grd14@15.asc | -0.15 | 0.30 | chb | -5018 | 6958 | grd14 | BH-03-9 | 12 | NaN |
| BH039_grd14@16.asc | 0.55  | 0.30 | chb | -5018 | 7058 | grd14 | BH-03-9 | 13 | NaN |
| BH039_grd14@17.asc | 0.26  | 0.27 | chb | -4918 | 7058 | grd14 | BH-03-9 | 14 | NaN |
| BH039_grd14@18.asc | 0.58  | 0.28 | chb | -4818 | 7058 | grd14 | BH-03-9 | 15 | NaN |
| BH039_grd14@19.asc | 0.56  | 0.31 | chb | -4718 | 7058 | grd14 | BH-03-9 | 16 | NaN |
| BH039_grd14@20.asc | -0.23 | 0.31 | chb | -4618 | 7058 | grd14 | BH-03-9 | 17 | NaN |
| BH039_grd14@21.asc | 0.70  | 0.30 | chb | -4518 | 7058 | grd14 | BH-03-9 | 18 | NaN |
| BH039_grd14@25.asc | 0.45  | 0.27 | chb | -4518 | 7158 | grd14 | BH-03-9 | 19 | NaN |
| BH039_grd14@26.asc | 1.01  | 0.29 | chb | -4618 | 7158 | grd14 | BH-03-9 | 20 | NaN |
| BH039_grd14@27.asc | 0.75  | 0.29 | chb | -4718 | 7158 | grd14 | BH-03-9 | 21 | NaN |
| BH039_grd14@28.asc | 0.98  | 0.45 | chb | -4818 | 7158 | grd14 | BH-03-9 | 22 | NaN |
| BH039_grd14@29.asc | 0.89  | 0.29 | chb | -4918 | 7158 | grd14 | BH-03-9 | 23 | NaN |
| BH039_grd14@30.asc | 0.27  | 0.34 | chb | -5018 | 7158 | grd14 | BH-03-9 | 24 | NaN |
| BH039_grd14@31.asc | 0.75  | 0.27 | chb | -5018 | 7258 | grd14 | BH-03-9 | 25 | NaN |
| BH039_grd14@32.asc | 0.69  | 0.43 | chb | -4918 | 7258 | grd14 | BH-03-9 | 26 | NaN |
| BH039_grd14@33.asc | 1.34  | 0.31 | chb | -4818 | 7258 | grd14 | BH-03-9 | 27 | NaN |
| BH039_grd14@34.asc | 1.90  | 0.26 | chb | -4718 | 7258 | grd14 | BH-03-9 | 28 | NaN |
| BH039_grd14@35.asc | 1.09  | 0.27 | chb | -4618 | 7258 | grd14 | BH-03-9 | 29 | NaN |
| BH039_grd14@36.asc | 0.88  | 0.31 | chb | -4518 | 7258 | grd14 | BH-03-9 | 30 | NaN |

|                    |       |      |     |       |      |       |         |    |     |
|--------------------|-------|------|-----|-------|------|-------|---------|----|-----|
| BH039_grd14@37.asc | 0.41  | 0.32 | chb | -4518 | 7358 | grd14 | BH-03-9 | 31 | NaN |
| BH039_grd14@38.asc | 0.15  | 0.28 | chb | -4618 | 7358 | grd14 | BH-03-9 | 32 | NaN |
| BH039_grd14@39.asc | 0.09  | 0.36 | chb | -4718 | 7358 | grd14 | BH-03-9 | 33 | NaN |
| BH039_grd14@40.asc | 0.77  | 0.28 | chb | -4818 | 7358 | grd14 | BH-03-9 | 34 | NaN |
| BH039_grd14@41.asc | 0.46  | 0.33 | chb | -4918 | 7358 | grd14 | BH-03-9 | 35 | NaN |
| BH039_grd14@42.asc | 0.77  | 0.27 | chb | -5018 | 7358 | grd14 | BH-03-9 | 36 | NaN |
| BH039_grd14@46.asc | 0.35  | 0.34 | chb | -5018 | 7458 | grd14 | BH-03-9 | 37 | NaN |
| BH039_grd14@47.asc | 1.10  | 0.26 | chb | -4918 | 7458 | grd14 | BH-03-9 | 38 | NaN |
| BH039_grd14@48.asc | 0.47  | 0.29 | chb | -4818 | 7458 | grd14 | BH-03-9 | 39 | NaN |
| BH039_grd14@49.asc | 0.65  | 0.27 | chb | -4718 | 7458 | grd14 | BH-03-9 | 40 | NaN |
| BH039_grd14@50.asc | 0.39  | 0.35 | chb | -4618 | 7458 | grd14 | BH-03-9 | 41 | NaN |
| BH039_grd14@51.asc | -0.58 | 0.24 | chb | -4518 | 7458 | grd14 | BH-03-9 | 42 | NaN |
| BH039_grd14@52.asc | 1.40  | 0.27 | chb | -4518 | 7558 | grd14 | BH-03-9 | 43 | NaN |
| BH039_grd14@53.asc | 0.62  | 0.27 | chb | -4618 | 7558 | grd14 | BH-03-9 | 44 | NaN |
| BH039_grd14@54.asc | 0.06  | 0.30 | chb | -4718 | 7558 | grd14 | BH-03-9 | 45 | NaN |
| BH039_grd14@55.asc | 0.22  | 0.29 | chb | -4818 | 7558 | grd14 | BH-03-9 | 46 | NaN |
| BH039_grd14@56.asc | 0.34  | 0.29 | chb | -4918 | 7558 | grd14 | BH-03-9 | 47 | NaN |
| BH039_grd14@57.asc | 0.08  | 0.36 | chb | -5018 | 7558 | grd14 | BH-03-9 | 48 | NaN |
| BH039_grd14@58.asc | 0.51  | 0.29 | chb | -5018 | 7658 | grd14 | BH-03-9 | 49 | NaN |
| BH039_grd14@59.asc | 1.11  | 0.30 | chb | -4918 | 7658 | grd14 | BH-03-9 | 50 | NaN |
| BH039_grd14@60.asc | 0.40  | 0.41 | chb | -4818 | 7658 | grd14 | BH-03-9 | 51 | NaN |
| BH039_grd14@61.asc | 0.84  | 0.34 | chb | -4718 | 7658 | grd14 | BH-03-9 | 52 | NaN |
| BH039_grd14@62.asc | 1.27  | 0.32 | chb | -4618 | 7658 | grd14 | BH-03-9 | 53 | NaN |
| BH039_grd14@63.asc | 0.63  | 0.31 | chb | -4518 | 7658 | grd14 | BH-03-9 | 54 | NaN |
| BH039_grd15@4.asc  | 1.13  | 0.31 | chb | -1656 | 6431 | grd15 | BH-03-9 | 1  | NaN |
| BH039_grd15@5.asc  | 1.22  | 0.24 | chb | -1456 | 6431 | grd15 | BH-03-9 | 2  | NaN |
| BH039_grd15@6.asc  | 1.37  | 0.28 | chb | -1256 | 6431 | grd15 | BH-03-9 | 3  | NaN |
| BH039_grd15@7.asc  | 1.44  | 0.26 | chb | -1056 | 6431 | grd15 | BH-03-9 | 4  | NaN |
| BH039_grd15@8.asc  | 0.65  | 0.26 | chb | -856  | 6431 | grd15 | BH-03-9 | 5  | NaN |
| BH039_grd15@9.asc  | 1.31  | 0.27 | chb | -856  | 6631 | grd15 | BH-03-9 | 6  | NaN |
| BH039_grd15@10.asc | 1.69  | 0.26 | chb | -1056 | 6631 | grd15 | BH-03-9 | 7  | NaN |
| BH039_grd15@11.asc | 0.81  | 0.31 | chb | -1256 | 6631 | grd15 | BH-03-9 | 8  | NaN |
| BH039_grd15@12.asc | 1.13  | 0.26 | chb | -1456 | 6631 | grd15 | BH-03-9 | 9  | NaN |
| BH039_grd15@13.asc | 0.91  | 0.27 | chb | -1656 | 6631 | grd15 | BH-03-9 | 10 | NaN |
| BH039_grd15@14.asc | 0.58  | 0.30 | chb | -1656 | 6831 | grd15 | BH-03-9 | 11 | NaN |
| BH039_grd15@15.asc | 0.68  | 0.34 | chb | -1456 | 6831 | grd15 | BH-03-9 | 12 | NaN |
| BH039_grd15@16.asc | 0.60  | 0.32 | chb | -1256 | 6831 | grd15 | BH-03-9 | 13 | NaN |
| BH039_grd15@17.asc | 0.48  | 0.27 | chb | -1056 | 6831 | grd15 | BH-03-9 | 14 | NaN |
| BH039_grd15@18.asc | 1.13  | 0.30 | chb | -856  | 6831 | grd15 | BH-03-9 | 15 | NaN |
| BH039_grd15@22.asc | 1.04  | 0.28 | chb | -856  | 7031 | grd15 | BH-03-9 | 16 | NaN |
| BH039_grd15@23.asc | 1.35  | 0.35 | chb | -1056 | 7031 | grd15 | BH-03-9 | 17 | NaN |
| BH039_grd15@24.asc | 1.30  | 0.41 | chb | -1256 | 7031 | grd15 | BH-03-9 | 18 | NaN |
| BH039_grd15@25.asc | 1.34  | 0.25 | chb | -1456 | 7031 | grd15 | BH-03-9 | 19 | NaN |
| BH039_grd15@26.asc | 1.24  | 0.35 | chb | -1656 | 7031 | grd15 | BH-03-9 | 20 | NaN |
| BH039_grd15@27.asc | 1.25  | 0.38 | chb | -1656 | 7231 | grd15 | BH-03-9 | 21 | NaN |
| BH039_grd15@28.asc | -0.39 | 0.22 | chb | -1456 | 7231 | grd15 | BH-03-9 | 22 | NaN |
| BH039_grd15@29.asc | -0.21 | 0.32 | chb | -1256 | 7231 | grd15 | BH-03-9 | 23 | NaN |

|                    |       |      |        |       |       |       |           |    |       |
|--------------------|-------|------|--------|-------|-------|-------|-----------|----|-------|
| BH039_grd15@30.asc | -0.08 | 0.27 | chb    | -1056 | 7231  | grd15 | BH-03-9   | 24 | NaN   |
| BH039_grd15@31.asc | 0.30  | 0.32 | chb    | -856  | 7231  | grd15 | BH-03-9   | 25 | NaN   |
| BH039_grd15@32.asc | -1.11 | 0.35 | chb    | -856  | 7431  | grd15 | BH-03-9   | 26 | NaN   |
| BH039_grd15@33.asc | -0.18 | 0.23 | chb    | -1056 | 7431  | grd15 | BH-03-9   | 27 | NaN   |
| BH039_grd15@34.asc | -0.16 | 0.25 | chb    | -1256 | 7431  | grd15 | BH-03-9   | 28 | NaN   |
| BH039_grd15@35.asc | 1.17  | 0.26 | chb    | -1456 | 7431  | grd15 | BH-03-9   | 29 | NaN   |
| BH039_grd15@36.asc | 0.61  | 0.23 | chb    | -1656 | 7431  | grd15 | BH-03-9   | 30 | NaN   |
| brc3grd1b@1.asc    | -2.87 | 0.17 | cement | 1833  | 1142  | grd1b | BRC-01-3A | 1  | Fig05 |
| brc3grd1b@2.asc    | -2.22 | 0.11 | cement | 2033  | 1142  | grd1b | BRC-01-3A | 2  | Fig05 |
| brc3grd1b@3.asc    | 0.53  | 0.18 | cht    | 2033  | 1350  | grd1b | BRC-01-3A | 3  | Fig05 |
| brc3grd1b@4.asc    | 0.52  | 0.17 | cht    | 1833  | 1350  | grd1b | BRC-01-3A | 4  | Fig05 |
| brc3grd1b@5.asc    | -0.35 | 0.18 | cht    | 1833  | 1558  | grd1b | BRC-01-3A | 5  | Fig05 |
| brc3grd1b@6.asc    | -0.59 | 0.16 | cht    | 2033  | 1558  | grd1b | BRC-01-3A | 6  | Fig05 |
| brc3grd1b@7.asc    | -0.02 | 0.19 | cht    | 2033  | 1767  | grd1b | BRC-01-3A | 7  | Fig05 |
| brc3grd1b@8.asc    | 0.42  | 0.14 | cht    | 1833  | 1767  | grd1b | BRC-01-3A | 8  | Fig05 |
| brc3grd1b@9.asc    | 0.57  | 0.17 | cht    | 1833  | 1975  | grd1b | BRC-01-3A | 9  | Fig05 |
| brc3grd1b@10.asc   | 0.60  | 0.14 | cht    | 2033  | 1975  | grd1b | BRC-01-3A | 10 | Fig05 |
| brc3grd1b@11.asc   | 0.29  | 0.21 | cht    | 2033  | 2183  | grd1b | BRC-01-3A | 11 | Fig05 |
| brc3grd1b@12.asc   | -0.11 | 0.23 | cht    | 1833  | 2183  | grd1b | BRC-01-3A | 12 | Fig05 |
| brc3grd2b@1.asc    | -2.94 | 0.14 | cement | 1867  | -2080 | grd2b | BRC-01-3A | 13 | Fig05 |
| brc3grd2b@2.asc    | -2.63 | 0.15 | cement | 2067  | -2080 | grd2b | BRC-01-3A | 14 | Fig05 |
| brc3grd2b@3.asc    | 0.06  | 0.26 | cht    | 2067  | -1880 | grd2b | BRC-01-3A | 15 | Fig05 |
| brc3grd2b@4.asc    | 0.79  | 0.24 | cht    | 1867  | -1880 | grd2b | BRC-01-3A | 16 | Fig05 |
| brc3grd2b@5.asc    | 1.27  | 0.18 | cht    | 1867  | -1680 | grd2b | BRC-01-3A | 17 | Fig05 |
| brc3grd2b@6.asc    | 0.55  | 0.16 | cht    | 2067  | -1680 | grd2b | BRC-01-3A | 18 | Fig05 |
| brc3grd2b@7.asc    | 0.51  | 0.15 | cht    | 2067  | -1480 | grd2b | BRC-01-3A | 19 | Fig05 |
| brc3grd2b@8.asc    | 0.66  | 0.14 | cht    | 1867  | -1480 | grd2b | BRC-01-3A | 20 | Fig05 |
| brc3grd2b@9.asc    | 0.51  | 0.17 | cht    | 1867  | -1280 | grd2b | BRC-01-3A | 21 | Fig05 |
| brc3grd2b@10.asc   | 0.55  | 0.16 | cht    | 2067  | -1280 | grd2b | BRC-01-3A | 22 | Fig05 |
| brc3grd2b@11.asc   | -1.40 | 0.19 | cht    | 2067  | -1080 | grd2b | BRC-01-3A | 23 | Fig05 |
| brc3grd2b@12.asc   | -0.65 | 0.15 | cht    | 1867  | -1080 | grd2b | BRC-01-3A | 24 | Fig05 |
| brc3grd2b@13.asc   | -0.94 | 0.16 | cht    | 1891  | -880  | grd2b | BRC-01-3A | 25 | Fig05 |
| brc3grd2b@14.asc   | -2.81 | 0.18 | cht    | 2091  | -880  | grd2b | BRC-01-3A | 26 | Fig05 |
| brc3grd2b@15.asc   | -2.82 | 0.21 | cement | 2091  | -680  | grd2b | BRC-01-3A | 27 | Fig05 |
| brc3grd2b@16.asc   | -2.86 | 0.19 | cement | 1870  | -680  | grd2b | BRC-01-3A | 28 | Fig05 |
| brc3grd34b@1.asc   | -2.25 | 0.18 | cement | 1776  | NaN   | grd3b | BRC-01-3A | 29 | Fig05 |
| brc3grd34b@2.asc   | -2.24 | 0.17 | cement | 2075  | NaN   | grd3b | BRC-01-3A | 30 | Fig05 |
| brc3grd34b@3.asc   | -3.18 | 0.17 | cement | 2107  | NaN   | grd3b | BRC-01-3A | 31 | Fig05 |
| brc3grd34b@4.asc   | -3.01 | 0.22 | cement | 1734  | -324  | grd3b | BRC-01-3A | 32 | Fig05 |
| brc3grd34b@5.asc   | -3.17 | 0.18 | cement | 1829  | -59   | grd3b | BRC-01-3A | 33 | Fig05 |
| brc3grd34b@6.asc   | -2.60 | 0.18 | cement | 2048  | NaN   | grd3b | BRC-01-3A | 34 | Fig05 |
| brc3grd34b@7.asc   | -2.75 | 0.18 | cement | 2012  | 153   | grd3b | BRC-01-3A | 35 | Fig05 |
| brc3grd34b@8.asc   | -3.44 | 0.17 | cement | 1789  | NaN   | grd3b | BRC-01-3A | 36 | Fig05 |
| brc3grd34b@9.asc   | -3.00 | 0.14 | cement | 1772  | 328   | grd3b | BRC-01-3A | 37 | Fig05 |
| brc3grd34b@10.asc  | -2.47 | 0.17 | cement | 1976  | 387   | grd3b | BRC-01-3A | 38 | Fig05 |
| brc3grd34b@11.asc  | -1.91 | 0.14 | cement | 2044  | 542   | grd3b | BRC-01-3A | 39 | Fig05 |
| brc3grd34b@12.asc  | -3.22 | 0.18 | cement | 1774  | 599   | grd3b | BRC-01-3A | 40 | Fig05 |

|                   |       |      |        |       |       |        |           |    |       |
|-------------------|-------|------|--------|-------|-------|--------|-----------|----|-------|
| brc3grd34b@13.asc | -2.83 | 0.17 | cement | 1787  | 744   | grd3b  | BRC-01-3A | 41 | Fig05 |
| brc3grd34b@14.asc | -3.43 | 0.16 | cement | 2073  | NaN   | grd3b  | BRC-01-3A | 42 | Fig05 |
| brc3grd34b@15.asc | -2.03 | 0.19 | cement | 2072  | NaN   | grd3b  | BRC-01-3A | 43 | Fig05 |
| brc3grd34b@16.asc | -1.83 | 0.19 | cement | 1859  | NaN   | grd3b  | BRC-01-3A | 44 | Fig05 |
| brc3grd56b@1.asc  | -2.03 | 0.16 | cement | -3864 | -178  | grd56b | BRC-01-3A | 1  | NaN   |
| brc3grd56b@2.asc  | -1.95 | 0.16 | cement | -3603 | -178  | grd56b | BRC-01-3A | 2  | NaN   |
| brc3grd56b@3.asc  | -1.54 | 0.16 | cement | -3626 | 6     | grd56b | BRC-01-3A | 3  | NaN   |
| brc3grd56b@4.asc  | -2.72 | 0.16 | cement | -3887 | 6     | grd56b | BRC-01-3A | 4  | NaN   |
| brc3grd56b@5.asc  | -1.99 | 0.15 | cement | -3905 | 190   | grd56b | BRC-01-3A | 5  | NaN   |
| brc3grd56b@6.asc  | -2.82 | 0.16 | cement | -3619 | 190   | grd56b | BRC-01-3A | 6  | NaN   |
| brc3grd56b@7.asc  | -2.54 | 0.14 | cement | -3673 | 392.7 | grd56b | BRC-01-3A | 7  | NaN   |
| brc3grd56b@8.asc  | -2.02 | 0.16 | cement | -3929 | 392.7 | grd56b | BRC-01-3A | 8  | NaN   |
| brc3grd56b@9.asc  | -1.69 | 0.15 | cement | -3956 | 595.3 | grd56b | BRC-01-3A | 9  | NaN   |
| brc3grd56b@10.asc | -2.66 | 0.17 | cement | -3735 | 595.3 | grd56b | BRC-01-3A | 10 | NaN   |
| brc3grd56b@11.asc | -1.17 | 0.17 | cement | -3738 | 798   | grd56b | BRC-01-3A | 11 | NaN   |
| brc3grd56b@12.asc | -1.94 | 0.19 | cement | -3958 | 798   | grd56b | BRC-01-3A | 12 | NaN   |
| brc3grd56b@16.asc | -2.40 | 0.16 | cement | -3993 | 1010  | grd56b | BRC-01-3A | 13 | NaN   |
| brc3grd56b@17.asc | -2.35 | 0.18 | cement | -3793 | 1010  | grd56b | BRC-01-3A | 14 | NaN   |
| brc3grd56b@18.asc | -1.94 | 0.18 | cement | -3774 | 1223  | grd56b | BRC-01-3A | 15 | NaN   |
| brc3grd56b@19.asc | -2.44 | 0.19 | cement | -3986 | 1223  | grd56b | BRC-01-3A | 16 | NaN   |
| brc3grd56b@20.asc | -1.81 | 0.20 | cement | -3986 | 1435  | grd56b | BRC-01-3A | 17 | NaN   |
| brc3grd56b@21.asc | -3.74 | 0.19 | cement | -3779 | 1435  | grd56b | BRC-01-3A | 18 | NaN   |
| brc3grd56b@22.asc | -2.03 | 0.17 | cement | -3779 | 1666  | grd56b | BRC-01-3A | 19 | NaN   |
| brc3grd56b@23.asc | -2.22 | 0.18 | cement | -4012 | 1666  | grd56b | BRC-01-3A | 20 | NaN   |
| brc3grd56b@24.asc | 0.18  | 0.16 | cement | -4012 | 1897  | grd56b | BRC-01-3A | 21 | NaN   |
| brc3grd56b@25.asc | -2.05 | 0.14 | cement | -3798 | 1897  | grd56b | BRC-01-3A | 22 | NaN   |
| brc3grd56b@26.asc | -0.53 | 0.16 | cement | -3780 | 2131  | grd56b | BRC-01-3A | 23 | NaN   |
| brc3grd56b@27.asc | -1.69 | 0.20 | cement | -4010 | 2131  | grd56b | BRC-01-3A | 24 | NaN   |
| brc3grd789@1.asc  | -0.07 | 0.15 | cht    | 4574  | -856  | grd7   | BRC-01-3A | 1  | NaN   |
| brc3grd789@2.asc  | 0.35  | 0.15 | cht    | 4774  | -856  | grd7   | BRC-01-3A | 2  | NaN   |
| brc3grd789@3.asc  | -1.60 | 0.17 | cement | 4774  | -731  | grd7   | BRC-01-3A | 3  | NaN   |
| brc3grd789@4.asc  | -1.63 | 0.20 | cement | 4574  | -731  | grd7   | BRC-01-3A | 4  | NaN   |
| brc3grd789@5.asc  | -1.73 | 0.17 | cement | 4574  | -606  | grd7   | BRC-01-3A | 5  | NaN   |
| brc3grd789@6.asc  | -0.73 | 0.20 | cement | 4774  | -606  | grd7   | BRC-01-3A | 6  | NaN   |
| brc3grd789@7.asc  | -1.03 | 0.12 | cement | 4774  | -481  | grd7   | BRC-01-3A | 7  | NaN   |
| brc3grd789@8.asc  | 0.33  | 0.21 | cement | 4574  | -481  | grd7   | BRC-01-3A | 8  | NaN   |
| brc3grd789@9.asc  | -2.29 | 0.13 | cement | 4574  | -356  | grd7   | BRC-01-3A | 9  | NaN   |
| brc3grd789@10.asc | -1.70 | 0.14 | cement | 4774  | -356  | grd7   | BRC-01-3A | 10 | NaN   |
| brc3grd789@11.asc | -2.19 | 0.21 | cement | 4774  | -231  | grd7   | BRC-01-3A | 11 | NaN   |
| brc3grd789@12.asc | -3.94 | 0.17 | cement | 4574  | -231  | grd7   | BRC-01-3A | 12 | NaN   |
| brc3grd789@13.asc | -1.58 | 0.17 | cement | 4574  | -106  | grd7   | BRC-01-3A | 13 | NaN   |
| brc3grd789@14.asc | -2.22 | 0.14 | cement | 4774  | -106  | grd7   | BRC-01-3A | 14 | NaN   |
| brc3grd789@15.asc | -2.66 | 0.14 | cement | 4774  | 19    | grd7   | BRC-01-3A | 15 | NaN   |
| brc3grd789@16.asc | -2.17 | 0.15 | cement | 4574  | 19    | grd7   | BRC-01-3A | 16 | NaN   |
| brc3grd789@17.asc | -2.81 | 0.16 | cement | 4574  | 144   | grd7   | BRC-01-3A | 17 | NaN   |
| brc3grd789@21.asc | -2.18 | 0.15 | cement | 4774  | 144   | grd7   | BRC-01-3A | 18 | NaN   |
| brc3grd789@22.asc | -4.01 | 0.16 | cement | 4774  | 269   | grd7   | BRC-01-3A | 19 | NaN   |

|                   |       |      |        |       |       |      |           |    |     |
|-------------------|-------|------|--------|-------|-------|------|-----------|----|-----|
| brc3grd789@23.asc | -4.78 | 0.22 | cement | 4574  | 269   | grd7 | BRC-01-3A | 20 | NaN |
| brc3grd789@24.asc | -2.92 | 0.17 | cement | 4574  | 394   | grd7 | BRC-01-3A | 21 | NaN |
| brc3grd789@25.asc | -3.35 | 0.18 | cement | 4774  | 394   | grd7 | BRC-01-3A | 22 | NaN |
| brc3grd789@26.asc | -3.53 | 0.17 | cement | 4774  | 519   | grd7 | BRC-01-3A | 23 | NaN |
| brc3grd789@27.asc | -2.74 | 0.16 | cement | 4574  | 519   | grd7 | BRC-01-3A | 24 | NaN |
| brc3grd789@28.asc | -3.35 | 0.16 | cement | 4574  | 644   | grd7 | BRC-01-3A | 25 | NaN |
| brc3grd789@29.asc | -3.30 | 0.18 | cement | 4774  | 644   | grd7 | BRC-01-3A | 26 | NaN |
| brc3grd789@30.asc | -2.56 | 0.17 | cement | 4774  | 769   | grd7 | BRC-01-3A | 27 | NaN |
| brc3grd789@31.asc | -3.95 | 0.19 | cement | 4574  | 769   | grd7 | BRC-01-3A | 28 | NaN |
| brc3grd789@32.asc | -4.01 | 0.20 | cement | 4574  | 894   | grd7 | BRC-01-3A | 29 | NaN |
| brc3grd789@33.asc | -2.86 | 0.18 | cement | 4774  | 894   | grd7 | BRC-01-3A | 30 | NaN |
| brc3grd789@34.asc | -2.78 | 0.19 | cement | 4774  | 1019  | grd7 | BRC-01-3A | 31 | NaN |
| brc3grd789@35.asc | -1.75 | 0.17 | cement | 4574  | 1019  | grd7 | BRC-01-3A | 32 | NaN |
| brc3grd789@36.asc | -2.36 | 0.18 | cement | 4574  | 1144  | grd7 | BRC-01-3A | 33 | NaN |
| brc3grd789@37.asc | -2.94 | 0.17 | cement | 4774  | 1144  | grd7 | BRC-01-3A | 34 | NaN |
| brc3grd789@41.asc | 0.68  | 0.17 | cht    | 63    | -2547 | grd8 | BRC-01-3A | 1  | NaN |
| brc3grd789@42.asc | 1.05  | 0.23 | cht    | 163   | -2547 | grd8 | BRC-01-3A | 2  | NaN |
| brc3grd789@43.asc | -2.87 | 0.17 | cement | 163   | -2332 | grd8 | BRC-01-3A | 3  | NaN |
| brc3grd789@44.asc | -0.19 | 0.19 | cht    | 63    | -2332 | grd8 | BRC-01-3A | 4  | NaN |
| brc3grd789@45.asc | -2.55 | 0.17 | cement | 63    | -2117 | grd8 | BRC-01-3A | 5  | NaN |
| brc3grd789@46.asc | -2.98 | 0.17 | cement | 163   | -2117 | grd8 | BRC-01-3A | 6  | NaN |
| brc3grd789@47.asc | -0.70 | 0.21 | cement | 163   | -1903 | grd8 | BRC-01-3A | 7  | NaN |
| brc3grd789@48.asc | -2.20 | 0.15 | cement | 63    | -1903 | grd8 | BRC-01-3A | 8  | NaN |
| brc3grd789@49.asc | 1.47  | 0.15 | cht    | 63    | -1689 | grd8 | BRC-01-3A | 9  | NaN |
| brc3grd789@50.asc | 0.82  | 0.18 | cht    | 163   | -1689 | grd8 | BRC-01-3A | 10 | NaN |
| brc3grd789@51.asc | 0.86  | 0.18 | cht    | 163   | -1474 | grd8 | BRC-01-3A | 11 | NaN |
| brc3grd789@52.asc | 0.55  | 0.14 | cht    | 63    | -1475 | grd8 | BRC-01-3A | 12 | NaN |
| brc3grd789@53.asc | 0.72  | 0.17 | cht    | 63    | -1260 | grd8 | BRC-01-3A | 13 | NaN |
| brc3grd789@54.asc | -0.24 | 0.18 | cht    | 163   | -1260 | grd8 | BRC-01-3A | 14 | NaN |
| brc3grd789@55.asc | 0.63  | 0.20 | cht    | 163   | -1046 | grd8 | BRC-01-3A | 15 | NaN |
| brc3grd789@56.asc | 0.60  | 0.18 | cht    | 63    | -1046 | grd8 | BRC-01-3A | 16 | NaN |
| brc3grd789@60.asc | 0.97  | 0.25 | cht    | -1390 | 2479  | grd9 | BRC-01-3A | 1  | NaN |
| brc3grd789@61.asc | 0.84  | 0.18 | cht    | -1290 | 2479  | grd9 | BRC-01-3A | 2  | NaN |
| brc3grd789@62.asc | 0.47  | 0.17 | cht    | -1290 | 2679  | grd9 | BRC-01-3A | 3  | NaN |
| brc3grd789@63.asc | 0.66  | 0.18 | cht    | -1390 | 2679  | grd9 | BRC-01-3A | 4  | NaN |
| brc3grd789@64.asc | 0.87  | 0.20 | cht    | -1390 | 2879  | grd9 | BRC-01-3A | 5  | NaN |
| brc3grd789@65.asc | 0.73  | 0.18 | cht    | -1290 | 2879  | grd9 | BRC-01-3A | 6  | NaN |
| brc3grd789@66.asc | 0.41  | 0.19 | cht    | -1290 | 3079  | grd9 | BRC-01-3A | 7  | NaN |
| brc3grd789@67.asc | 1.19  | 0.18 | cht    | -1390 | 3079  | grd9 | BRC-01-3A | 8  | NaN |
| brc3grd789@68.asc | 0.13  | 0.16 | cht    | -1390 | 3279  | grd9 | BRC-01-3A | 9  | NaN |
| brc3grd789@69.asc | 0.16  | 0.16 | cht    | -1290 | 3279  | grd9 | BRC-01-3A | 10 | NaN |
| brc3grd789@70.asc | 0.53  | 0.19 | carb   | -1290 | 3479  | grd9 | BRC-01-3A | 11 | NaN |
| brc3grd789@71.asc | 0.53  | 0.19 | carb   | -1390 | 3479  | grd9 | BRC-01-3A | 12 | NaN |
| brc3grd789@72.asc | 0.73  | 0.16 | carb   | -1390 | 3679  | grd9 | BRC-01-3A | 13 | NaN |
| brc3grd789@73.asc | 0.83  | 0.16 | carb   | -1290 | 3679  | grd9 | BRC-01-3A | 14 | NaN |
| brc3grd789@74.asc | 0.71  | 0.17 | carb   | -1290 | 3879  | grd9 | BRC-01-3A | 15 | NaN |
| brc3grd789@75.asc | 1.08  | 0.14 | carb   | -1390 | 3879  | grd9 | BRC-01-3A | 16 | NaN |

|                  |       |      |        |      |       |       |            |    |     |
|------------------|-------|------|--------|------|-------|-------|------------|----|-----|
| brc3grd10@1.asc  | -2.46 | 0.18 | cement | 1320 | 709   | grd10 | BRC-01-3A  | 1  | NaN |
| brc3grd10@2.asc  | -2.62 | 0.15 | cement | 1420 | 709   | grd10 | BRC-01-3A  | 2  | NaN |
| brc3grd10@3.asc  | -2.63 | 0.13 | cement | 1520 | 709   | grd10 | BRC-01-3A  | 3  | NaN |
| brc3grd10@4.asc  | -1.61 | 0.16 | cement | 1620 | 709   | grd10 | BRC-01-3A  | 4  | NaN |
| brc3grd10@5.asc  | -2.74 | 0.17 | cement | 1620 | 809   | grd10 | BRC-01-3A  | 5  | NaN |
| brc3grd10@6.asc  | -2.57 | 0.16 | cement | 1520 | 809   | grd10 | BRC-01-3A  | 6  | NaN |
| brc3grd10@7.asc  | -2.10 | 0.20 | cement | 1420 | 809   | grd10 | BRC-01-3A  | 7  | NaN |
| brc3grd10@8.asc  | -0.85 | 0.14 | cement | 1320 | 809   | grd10 | BRC-01-3A  | 8  | NaN |
| brc3grd10@9.asc  | -1.48 | 0.16 | cement | 1320 | 909   | grd10 | BRC-01-3A  | 9  | NaN |
| brc3grd10@10.asc | -1.74 | 0.13 | cement | 1420 | 909   | grd10 | BRC-01-3A  | 10 | NaN |
| brc3grd10@11.asc | -1.94 | 0.16 | cement | 1520 | 909   | grd10 | BRC-01-3A  | 11 | NaN |
| brc3grd10@12.asc | -1.69 | 0.18 | cement | 1620 | 909   | grd10 | BRC-01-3A  | 12 | NaN |
| brc3grd10@13.asc | -2.32 | 0.16 | cement | 1620 | 1009  | grd10 | BRC-01-3A  | 13 | NaN |
| brc3grd10@14.asc | -1.19 | 0.17 | cement | 1520 | 1009  | grd10 | BRC-01-3A  | 14 | NaN |
| brc3grd10@15.asc | -1.20 | 0.13 | cement | 1420 | 1009  | grd10 | BRC-01-3A  | 15 | NaN |
| brc3grd10@16.asc | -1.88 | 0.19 | cement | 1320 | 1009  | grd10 | BRC-01-3A  | 16 | NaN |
| brc3grd11@1.asc  | -2.18 | 0.15 | cement | 218  | -618  | grd11 | BRC-01-3A  | 1  | NaN |
| brc3grd11@2.asc  | -0.61 | 0.16 | cement | 318  | -618  | grd11 | BRC-01-3A  | 2  | NaN |
| brc3grd11@3.asc  | 0.04  | 0.16 | cement | 318  | -418  | grd11 | BRC-01-3A  | 3  | NaN |
| brc3grd11@4.asc  | -0.96 | 0.13 | cement | 218  | -418  | grd11 | BRC-01-3A  | 4  | NaN |
| brc3grd11@5.asc  | -1.77 | 0.18 | cement | 218  | -218  | grd11 | BRC-01-3A  | 5  | NaN |
| brc3grd11@6.asc  | -1.99 | 0.17 | cement | 318  | -218  | grd11 | BRC-01-3A  | 6  | NaN |
| brc3grd11@7.asc  | -1.14 | 0.19 | cement | 318  | -18   | grd11 | BRC-01-3A  | 7  | NaN |
| brc3grd11@8.asc  | -1.25 | 0.16 | cement | 218  | -18   | grd11 | BRC-01-3A  | 8  | NaN |
| brc3grd11@9.asc  | -0.59 | 0.14 | cement | 218  | 182   | grd11 | BRC-01-3A  | 9  | NaN |
| brc3grd11@10.asc | -2.38 | 0.16 | cement | 318  | 182   | grd11 | BRC-01-3A  | 10 | NaN |
| brc3grd11@11.asc | -1.23 | 0.17 | cement | 318  | 382   | grd11 | BRC-01-3A  | 11 | NaN |
| brc3grd11@12.asc | -2.96 | 0.21 | cement | 218  | 382   | grd11 | BRC-01-3A  | 12 | NaN |
| brc3grd11@13.asc | -2.83 | 0.17 | cement | 218  | 582   | grd11 | BRC-01-3A  | 13 | NaN |
| brc3grd11@14.asc | -1.26 | 0.21 | cement | 318  | 582   | grd11 | BRC-01-3A  | 14 | NaN |
| brc3grd11@15.asc | -1.78 | 0.18 | cement | 318  | 782   | grd11 | BRC-01-3A  | 15 | NaN |
| brc3grd11@16.asc | -2.54 | 0.16 | cement | 218  | 782   | grd11 | BRC-01-3A  | 16 | NaN |
| 14grd1@1.asc     | 0.31  | 0.20 | cement | -912 | -7655 | grd1  | SAF 521-14 | 1  | NaN |
| 14grd1@2.asc     | -2.60 | 0.17 | cement | -812 | -7655 | grd1  | SAF 521-14 | 2  | NaN |
| 14grd1@3.asc     | 0.54  | 0.17 | cement | -812 | -7555 | grd1  | SAF 521-14 | 3  | NaN |
| 14grd1@4.asc     | 0.26  | 0.18 | cement | -912 | -7555 | grd1  | SAF 521-14 | 4  | NaN |
| 14grd1@5.asc     | 0.38  | 0.21 | cement | -912 | -7455 | grd1  | SAF 521-14 | 5  | NaN |
| 14grd1@6.asc     | 0.18  | 0.23 | cement | -812 | -7455 | grd1  | SAF 521-14 | 6  | NaN |
| 14grd1@7.asc     | 0.94  | 0.21 | chg    | -812 | -7355 | grd1  | SAF 521-14 | 7  | NaN |
| 14grd1@8.asc     | 0.19  | 0.18 | chg    | -912 | -7355 | grd1  | SAF 521-14 | 8  | NaN |
| 14grd1@9.asc     | 0.45  | 0.22 | chg    | -912 | -7255 | grd1  | SAF 521-14 | 9  | NaN |
| 14grd1@10.asc    | 0.57  | 0.22 | chg    | -812 | -7255 | grd1  | SAF 521-14 | 10 | NaN |
| 14grd1@11.asc    | 0.61  | 0.24 | chg    | -812 | -7155 | grd1  | SAF 521-14 | 11 | NaN |
| 14grd1@12.asc    | 0.96  | 0.25 | chg    | -912 | -7155 | grd1  | SAF 521-14 | 12 | NaN |
| 14grd1@13.asc    | 0.94  | 0.18 | chg    | -912 | -7055 | grd1  | SAF 521-14 | 13 | NaN |
| 14grd1@14.asc    | 0.69  | 0.19 | chg    | -812 | -7055 | grd1  | SAF 521-14 | 14 | NaN |
| 14grd1@15.asc    | 1.01  | 0.19 | chg    | -812 | -6955 | grd1  | SAF 521-14 | 15 | NaN |

|               |       |      |        |       |       |      |            |    |       |
|---------------|-------|------|--------|-------|-------|------|------------|----|-------|
| 14grd1@16.asc | 0.22  | 0.18 | chg    | -912  | -6955 | grd1 | SAF 521-14 | 16 | NaN   |
| 14grd2@1.asc  | -0.62 | 0.11 | chg    | -1683 | -8180 | grd2 | SAF 521-14 | 1  | NaN   |
| 14grd2@2.asc  | 0.27  | 0.14 | chg    | -1583 | -8180 | grd2 | SAF 521-14 | 2  | NaN   |
| 14grd2@3.asc  | 0.50  | 0.18 | chg    | -1583 | -8080 | grd2 | SAF 521-14 | 3  | NaN   |
| 14grd2@4.asc  | 0.75  | 0.10 | chg    | -1683 | -8080 | grd2 | SAF 521-14 | 4  | NaN   |
| 14grd2@5.asc  | 1.00  | 0.15 | chg    | -1683 | -7980 | grd2 | SAF 521-14 | 5  | NaN   |
| 14grd2@6.asc  | 1.21  | 0.15 | chg    | -1583 | -7980 | grd2 | SAF 521-14 | 6  | NaN   |
| 14grd2@7.asc  | 0.86  | 0.09 | chg    | -1583 | -7880 | grd2 | SAF 521-14 | 7  | NaN   |
| 14grd2@8.asc  | 1.04  | 0.25 | chg    | -1683 | -7880 | grd2 | SAF 521-14 | 8  | NaN   |
| 14grd2@9.asc  | 0.45  | 0.14 | cement | -1683 | -7780 | grd2 | SAF 521-14 | 9  | NaN   |
| 14grd2@10.asc | 0.29  | 0.18 | cement | -1583 | -7780 | grd2 | SAF 521-14 | 10 | NaN   |
| 14grd2@11.asc | -0.71 | 0.17 | cement | -1583 | -7680 | grd2 | SAF 521-14 | 11 | NaN   |
| 14grd2@12.asc | -0.11 | 0.15 | cement | -1683 | -7680 | grd2 | SAF 521-14 | 12 | NaN   |
| 14grd2@13.asc | -0.37 | 0.16 | cement | -1683 | -7580 | grd2 | SAF 521-14 | 13 | NaN   |
| 14grd2@14.asc | 0.22  | 0.11 | cement | -1583 | -7580 | grd2 | SAF 521-14 | 14 | NaN   |
| 14grd2@15.asc | 0.26  | 0.14 | cement | -1583 | -7480 | grd2 | SAF 521-14 | 15 | NaN   |
| 14grd2@16.asc | -0.33 | 0.15 | cement | -1683 | -7480 | grd2 | SAF 521-14 | 16 | NaN   |
| 15grd1@1.asc  | -0.26 | 0.21 | vein   | 1407  | 324   | grd1 | SAF 521-15 | 1  | Fig04 |
| 15grd1@2.asc  | 1.31  | 0.31 | chg    | 1507  | 324   | grd1 | SAF 521-15 | 2  | Fig04 |
| 15grd1@3.asc  | 0.45  | 0.24 | chg    | 1607  | 324   | grd1 | SAF 521-15 | 3  | Fig04 |
| 15grd1@4.asc  | 0.01  | 0.18 | chg    | 1707  | 324   | grd1 | SAF 521-15 | 4  | Fig04 |
| 15grd1@5.asc  | 1.67  | 0.18 | chm    | 1707  | 424   | grd1 | SAF 521-15 | 5  | Fig04 |
| 15grd1@6.asc  | 1.45  | 0.18 | chm    | 1607  | 424   | grd1 | SAF 521-15 | 6  | Fig04 |
| 15grd1@7.asc  | 1.22  | 0.19 | chm    | 1507  | 424   | grd1 | SAF 521-15 | 7  | Fig04 |
| 15grd1@8.asc  | -0.01 | 0.17 | vein   | 1407  | 424   | grd1 | SAF 521-15 | 8  | Fig04 |
| 15grd1@9.asc  | 0.05  | 0.17 | vein   | 1407  | 524   | grd1 | SAF 521-15 | 9  | Fig04 |
| 15grd1@10.asc | 1.04  | 0.20 | chg    | 1507  | 524   | grd1 | SAF 521-15 | 10 | Fig04 |
| 15grd1@11.asc | 1.02  | 0.19 | chg    | 1607  | 524   | grd1 | SAF 521-15 | 11 | Fig04 |
| 15grd1@12.asc | 0.66  | 0.19 | chg    | 1707  | 524   | grd1 | SAF 521-15 | 12 | Fig04 |
| 15grd1@13.asc | 0.83  | 0.25 | chg    | 1707  | 624   | grd1 | SAF 521-15 | 13 | Fig04 |
| 15grd1@14.asc | 0.82  | 0.20 | chg    | 1607  | 624   | grd1 | SAF 521-15 | 14 | Fig04 |
| 15grd1@15.asc | 1.49  | 0.19 | chg    | 1507  | 624   | grd1 | SAF 521-15 | 15 | Fig04 |
| 15grd1@16.asc | -0.85 | 0.16 | vein   | 1407  | 624   | grd1 | SAF 521-15 | 16 | Fig04 |
| 15grd2@1.asc  | 1.39  | 0.24 | chg    | -2317 | -6054 | grd2 | SAF 521-15 | 1  | NaN   |
| 15grd2@2.asc  | 0.67  | 0.15 | chg    | -2217 | -6054 | grd2 | SAF 521-15 | 2  | NaN   |
| 15grd2@3.asc  | 0.83  | 0.18 | chm    | -2117 | -6054 | grd2 | SAF 521-15 | 3  | NaN   |
| 15grd2@4.asc  | 0.39  | 0.20 | chm    | -2017 | -6054 | grd2 | SAF 521-15 | 4  | NaN   |
| 15grd2@5.asc  | -0.06 | 0.21 | chm    | -2017 | -5954 | grd2 | SAF 521-15 | 5  | NaN   |
| 15grd2@6.asc  | 0.31  | 0.17 | chg    | -2117 | -5954 | grd2 | SAF 521-15 | 6  | NaN   |
| 15grd2@7.asc  | 0.61  | 0.20 | chg    | -2217 | -5954 | grd2 | SAF 521-15 | 7  | NaN   |
| 15grd2@8.asc  | 0.67  | 0.17 | chg    | -2317 | -5954 | grd2 | SAF 521-15 | 8  | NaN   |
| 15grd2@9.asc  | 0.65  | 0.16 | chg    | -2317 | -5854 | grd2 | SAF 521-15 | 9  | NaN   |
| 15grd2@10.asc | 0.82  | 0.17 | chg    | -2217 | -5854 | grd2 | SAF 521-15 | 10 | NaN   |
| 15grd2@11.asc | 0.79  | 0.17 | chg    | -2117 | -5854 | grd2 | SAF 521-15 | 11 | NaN   |
| 15grd2@12.asc | 0.75  | 0.15 | chm    | -2017 | -5854 | grd2 | SAF 521-15 | 12 | NaN   |
| 15grd2@13.asc | 0.55  | 0.17 | chm    | -2017 | -5754 | grd2 | SAF 521-15 | 13 | NaN   |
| 15grd2@14.asc | 0.55  | 0.18 | chm    | -2117 | -5754 | grd2 | SAF 521-15 | 14 | NaN   |

|                  |       |      |        |       |       |      |            |    |     |
|------------------|-------|------|--------|-------|-------|------|------------|----|-----|
| 15grd2@15.asc    | 0.91  | 0.19 | chm    | -2217 | -5754 | grd2 | SAF 521-15 | 15 | NaN |
| 15grd2@16.asc    | 0.90  | 0.21 | chm    | -2317 | -5754 | grd2 | SAF 521-15 | 16 | NaN |
| 15grd3@1.asc     | 0.39  | 0.20 | cement | 2838  | 517   | grd3 | SAF 521-15 | 1  | NaN |
| 15grd3@2.asc     | 1.70  | 0.18 | chg    | 2938  | 517   | grd3 | SAF 521-15 | 2  | NaN |
| 15grd3@3.asc     | 0.07  | 0.17 | cement | 3038  | 517   | grd3 | SAF 521-15 | 3  | NaN |
| 15grd3@4.asc     | 1.09  | 0.17 | chg    | 3138  | 517   | grd3 | SAF 521-15 | 4  | NaN |
| 15grd3@5.asc     | 0.50  | 0.17 | carbm  | 3138  | 617   | grd3 | SAF 521-15 | 5  | NaN |
| 15grd3@6.asc     | 1.03  | 0.18 | chg    | 3038  | 617   | grd3 | SAF 521-15 | 6  | NaN |
| 15grd3@7.asc     | 1.02  | 0.17 | chg    | 2938  | 617   | grd3 | SAF 521-15 | 7  | NaN |
| 15grd3@8.asc     | 1.51  | 0.22 | chg    | 2838  | 617   | grd3 | SAF 521-15 | 8  | NaN |
| 15grd3@9.asc     | 1.74  | 0.20 | chg    | 2838  | 717   | grd3 | SAF 521-15 | 9  | NaN |
| 15grd3@10.asc    | 1.48  | 0.17 | chg    | 2938  | 717   | grd3 | SAF 521-15 | 10 | NaN |
| 15grd3@11.asc    | -0.06 | 0.21 | cement | 3038  | 717   | grd3 | SAF 521-15 | 11 | NaN |
| 15grd3@12.asc    | 0.35  | 0.28 | cement | 3138  | 717   | grd3 | SAF 521-15 | 12 | NaN |
| 15grd3@13.asc    | 0.84  | 0.19 | cement | 3138  | 817   | grd3 | SAF 521-15 | 13 | NaN |
| 15grd3@14.asc    | 0.22  | 0.20 | cement | 3038  | 817   | grd3 | SAF 521-15 | 14 | NaN |
| 15grd3@15.asc    | 0.49  | 0.18 | cement | 2938  | 817   | grd3 | SAF 521-15 | 15 | NaN |
| 15grd3@16.asc    | 0.49  | 0.19 | cement | 2838  | 817   | grd3 | SAF 521-15 | 16 | NaN |
| 15grd4@1.asc     | 0.85  | 0.21 | vein   | -3291 | -4635 | grd4 | SAF 521-15 | 1  | NaN |
| 15grd4@2.asc     | 0.78  | 0.21 | vein   | -3191 | -4635 | grd4 | SAF 521-15 | 2  | NaN |
| 15grd4@3.asc     | 0.98  | 0.20 | chb    | -3091 | -4635 | grd4 | SAF 521-15 | 3  | NaN |
| 15grd4@4.asc     | 0.93  | 0.23 | chb    | -2991 | -4635 | grd4 | SAF 521-15 | 4  | NaN |
| 15grd4@5.asc     | 0.79  | 0.25 | chb    | -2991 | -4535 | grd4 | SAF 521-15 | 5  | NaN |
| 15grd4@6.asc     | 0.54  | 0.25 | chb    | -3091 | -4535 | grd4 | SAF 521-15 | 6  | NaN |
| 15grd4@7.asc     | 0.92  | 0.27 | chb    | -3191 | -4535 | grd4 | SAF 521-15 | 7  | NaN |
| 15grd4@8.asc     | 0.44  | 0.19 | chb    | -3291 | -4535 | grd4 | SAF 521-15 | 8  | NaN |
| 15grd4@9.asc     | 0.58  | 0.27 | chb    | -3291 | -4435 | grd4 | SAF 521-15 | 9  | NaN |
| 15grd4@10.asc    | 1.51  | 0.16 | chb    | -3191 | -4435 | grd4 | SAF 521-15 | 10 | NaN |
| 15grd4@11.asc    | 1.17  | 0.19 | chb    | -3091 | -4435 | grd4 | SAF 521-15 | 11 | NaN |
| 15grd4@12.asc    | 0.78  | 0.19 | chb    | -2991 | -4435 | grd4 | SAF 521-15 | 12 | NaN |
| 15grd4@13.asc    | 0.30  | 0.24 | chb    | -2991 | -4335 | grd4 | SAF 521-15 | 13 | NaN |
| 15grd4@14.asc    | 0.47  | 0.21 | chb    | -3091 | -4335 | grd4 | SAF 521-15 | 14 | NaN |
| 15grd4@15.asc    | 0.57  | 0.16 | chb    | -3191 | -4335 | grd4 | SAF 521-15 | 15 | NaN |
| 15grd4@16.asc    | 1.26  | 0.20 | chb    | -3291 | -4335 | grd4 | SAF 521-15 | 16 | NaN |
| 15grd5678@1.asc  | 0.68  | 0.14 | chg    | -3308 | -5447 | grd5 | SAF 521-15 | 1  | NaN |
| 15grd5678@2.asc  | 0.44  | 0.16 | chg    | -3208 | -5447 | grd5 | SAF 521-15 | 2  | NaN |
| 15grd5678@3.asc  | 0.94  | 0.14 | chm    | -3208 | -5347 | grd5 | SAF 521-15 | 3  | NaN |
| 15grd5678@4.asc  | 0.48  | 0.26 | chm    | -3308 | -5347 | grd5 | SAF 521-15 | 4  | NaN |
| 15grd5678@5.asc  | 0.30  | 0.17 | chg    | -3308 | -5247 | grd5 | SAF 521-15 | 5  | NaN |
| 15grd5678@6.asc  | 0.46  | 0.17 | chm    | -3208 | -5247 | grd5 | SAF 521-15 | 6  | NaN |
| 15grd5678@7.asc  | 0.33  | 0.15 | chg    | -3208 | -5147 | grd5 | SAF 521-15 | 7  | NaN |
| 15grd5678@8.asc  | 0.68  | 0.16 | chm    | -3308 | -5147 | grd5 | SAF 521-15 | 8  | NaN |
| 15grd5678@9.asc  | 0.43  | 0.18 | chg    | -3308 | -5047 | grd5 | SAF 521-15 | 9  | NaN |
| 15grd5678@10.asc | 0.22  | 0.17 | chg    | -3208 | -5047 | grd5 | SAF 521-15 | 10 | NaN |
| 15grd5678@11.asc | 0.47  | 0.21 | chg    | -3208 | -4947 | grd5 | SAF 521-15 | 11 | NaN |
| 15grd5678@12.asc | 0.31  | 0.19 | chg    | -3308 | -4947 | grd5 | SAF 521-15 | 12 | NaN |
| 15grd5678@13.asc | 0.44  | 0.17 | chm    | -3308 | -4847 | grd5 | SAF 521-15 | 13 | NaN |



|                  |       |      |       |       |       |      |            |    |     |
|------------------|-------|------|-------|-------|-------|------|------------|----|-----|
| 15grd5678@14.asc | 0.54  | 0.20 | chm   | -3208 | -4847 | grd5 | SAF 521-15 | 14 | NaN |
| 15grd5678@15.asc | 0.84  | 0.19 | chm   | -3208 | -4747 | grd5 | SAF 521-15 | 15 | NaN |
| 15grd5678@16.asc | 1.10  | 0.16 | chm   | -3308 | -4747 | grd5 | SAF 521-15 | 16 | NaN |
| 15grd5678@20.asc | 1.19  | 0.21 | chg   | -3167 | -5903 | grd6 | SAF 521-15 | 1  | NaN |
| 15grd5678@21.asc | 0.68  | 0.15 | chg   | -3067 | -5903 | grd6 | SAF 521-15 | 2  | NaN |
| 15grd5678@22.asc | 0.80  | 0.13 | chg   | -2967 | -5903 | grd6 | SAF 521-15 | 3  | NaN |
| 15grd5678@23.asc | 0.72  | 0.16 | chg   | -2867 | -5903 | grd6 | SAF 521-15 | 4  | NaN |
| 15grd5678@24.asc | 0.44  | 0.21 | chg   | -2767 | -5903 | grd6 | SAF 521-15 | 5  | NaN |
| 15grd5678@25.asc | 0.14  | 0.14 | chg   | -2667 | -5903 | grd6 | SAF 521-15 | 6  | NaN |
| 15grd5678@26.asc | 0.34  | 0.14 | chg   | -2567 | -5903 | grd6 | SAF 521-15 | 7  | NaN |
| 15grd5678@27.asc | 0.51  | 0.14 | chg   | -2467 | -5903 | grd6 | SAF 521-15 | 8  | NaN |
| 15grd5678@28.asc | 0.22  | 0.18 | chg   | -2467 | -5803 | grd6 | SAF 521-15 | 9  | NaN |
| 15grd5678@29.asc | 0.64  | 0.19 | chg   | -2567 | -5803 | grd6 | SAF 521-15 | 10 | NaN |
| 15grd5678@30.asc | 0.18  | 0.17 | chg   | -2667 | -5803 | grd6 | SAF 521-15 | 11 | NaN |
| 15grd5678@31.asc | 0.75  | 0.20 | chg   | -2767 | -5803 | grd6 | SAF 521-15 | 12 | NaN |
| 15grd5678@32.asc | 0.16  | 0.22 | chg   | -2867 | -5803 | grd6 | SAF 521-15 | 13 | NaN |
| 15grd5678@33.asc | 0.53  | 0.20 | chg   | -2967 | -5803 | grd6 | SAF 521-15 | 14 | NaN |
| 15grd5678@34.asc | 0.45  | 0.20 | chg   | -3067 | -5803 | grd6 | SAF 521-15 | 15 | NaN |
| 15grd5678@35.asc | 0.18  | 0.19 | chg   | -3167 | -5803 | grd6 | SAF 521-15 | 16 | NaN |
| 15grd5678@39.asc | 1.16  | 0.20 | chg   | -3167 | -5703 | grd6 | SAF 521-15 | 17 | NaN |
| 15grd5678@40.asc | 0.82  | 0.26 | chg   | -3067 | -5703 | grd6 | SAF 521-15 | 18 | NaN |
| 15grd5678@41.asc | 0.52  | 0.22 | chg   | -2967 | -5703 | grd6 | SAF 521-15 | 19 | NaN |
| 15grd5678@42.asc | 0.88  | 0.22 | chg   | -2867 | -5703 | grd6 | SAF 521-15 | 20 | NaN |
| 15grd5678@43.asc | 0.95  | 0.27 | chg   | -2767 | -5703 | grd6 | SAF 521-15 | 21 | NaN |
| 15grd5678@44.asc | 0.57  | 0.16 | chg   | -2667 | -5703 | grd6 | SAF 521-15 | 22 | NaN |
| 15grd5678@45.asc | 0.54  | 0.18 | chg   | -2567 | -5703 | grd6 | SAF 521-15 | 23 | NaN |
| 15grd5678@46.asc | 0.87  | 0.18 | chg   | -2467 | -5703 | grd6 | SAF 521-15 | 24 | NaN |
| 15grd5678@47.asc | 0.75  | 0.16 | chg   | -2467 | -5603 | grd6 | SAF 521-15 | 25 | NaN |
| 15grd5678@48.asc | 1.30  | 0.27 | chm   | -2567 | -5603 | grd6 | SAF 521-15 | 26 | NaN |
| 15grd5678@49.asc | 0.78  | 0.18 | chm   | -2667 | -5603 | grd6 | SAF 521-15 | 27 | NaN |
| 15grd5678@50.asc | 0.90  | 0.16 | chm   | -2767 | -5603 | grd6 | SAF 521-15 | 28 | NaN |
| 15grd5678@51.asc | 0.82  | 0.19 | chm   | -2867 | -5603 | grd6 | SAF 521-15 | 29 | NaN |
| 15grd5678@52.asc | 0.86  | 0.31 | chm   | -2967 | -5603 | grd6 | SAF 521-15 | 30 | NaN |
| 15grd5678@53.asc | 0.81  | 0.19 | chm   | -3067 | -5603 | grd6 | SAF 521-15 | 31 | NaN |
| 15grd5678@54.asc | 1.00  | 0.21 | chm   | -3167 | -5603 | grd6 | SAF 521-15 | 32 | NaN |
| 15grd5678@58.asc | -9.72 | 0.36 | volc? | 2383  | -841  | grd7 | SAF 521-15 | 1  | NaN |
| 15grd5678@59.asc | 1.79  | 0.14 | carbg | 2483  | -841  | grd7 | SAF 521-15 | 2  | NaN |
| 15grd5678@60.asc | 1.39  | 0.15 | chg   | 2583  | -841  | grd7 | SAF 521-15 | 3  | NaN |
| 15grd5678@61.asc | 1.43  | 0.17 | chg   | 2683  | -841  | grd7 | SAF 521-15 | 4  | NaN |
| 15grd5678@62.asc | 1.63  | 0.14 | chg   | 2683  | -741  | grd7 | SAF 521-15 | 5  | NaN |
| 15grd5678@63.asc | 1.49  | 0.14 | chg   | 2583  | -741  | grd7 | SAF 521-15 | 6  | NaN |
| 15grd5678@64.asc | 1.12  | 0.14 | chg   | 2483  | -741  | grd7 | SAF 521-15 | 7  | NaN |
| 15grd5678@65.asc | 0.60  | 0.40 | chm   | 2383  | -741  | grd7 | SAF 521-15 | 8  | NaN |
| 15grd5678@66.asc | 1.59  | 0.18 | chm   | 2383  | -641  | grd7 | SAF 521-15 | 9  | NaN |
| 15grd5678@67.asc | 0.41  | 0.22 | carbg | 2483  | -641  | grd7 | SAF 521-15 | 10 | NaN |
| 15grd5678@68.asc | 1.40  | 0.14 | chm   | 2583  | -641  | grd7 | SAF 521-15 | 11 | NaN |
| 15grd5678@69.asc | 0.56  | 0.15 | carbg | 2683  | -641  | grd7 | SAF 521-15 | 12 | NaN |

|                  |       |      |      |       |       |       |            |    |     |
|------------------|-------|------|------|-------|-------|-------|------------|----|-----|
| 15grd5678@70.asc | 0.89  | 0.30 | chm  | 2683  | -541  | grd7  | SAF 521-15 | 13 | NaN |
| 15grd5678@71.asc | 2.34  | 0.14 | chm  | 2583  | -541  | grd7  | SAF 521-15 | 14 | NaN |
| 15grd5678@72.asc | 0.77  | 0.18 | carb | 2483  | -541  | grd7  | SAF 521-15 | 15 | NaN |
| 15grd5678@73.asc | 1.26  | 0.17 | chm  | 2383  | -541  | grd7  | SAF 521-15 | 16 | NaN |
| 15grd5678@77.asc | -0.50 | 0.18 | vein | 1369  | 748   | grd8  | SAF 521-15 | 1  | NaN |
| 15grd5678@78.asc | -0.95 | 0.13 | vein | 1469  | 748   | grd8  | SAF 521-15 | 2  | NaN |
| 15grd5678@79.asc | 0.25  | 0.16 | carb | 1569  | 748   | grd8  | SAF 521-15 | 3  | NaN |
| 15grd5678@80.asc | 0.68  | 0.15 | carb | 1669  | 748   | grd8  | SAF 521-15 | 4  | NaN |
| 15grd5678@81.asc | 0.22  | 0.18 | chb  | 1669  | 848   | grd8  | SAF 521-15 | 5  | NaN |
| 15grd5678@82.asc | 0.45  | 0.17 | chb  | 1569  | 848   | grd8  | SAF 521-15 | 6  | NaN |
| 15grd5678@83.asc | 0.28  | 0.16 | vein | 1469  | 848   | grd8  | SAF 521-15 | 7  | NaN |
| 15grd5678@84.asc | -3.69 | 3.26 | vein | 1369  | 848   | grd8  | SAF 521-15 | 8  | NaN |
| 15grd5678@85.asc | -0.63 | 0.16 | vein | 1369  | 948   | grd8  | SAF 521-15 | 9  | NaN |
| 15grd5678@86.asc | -0.44 | 0.12 | vein | 1469  | 948   | grd8  | SAF 521-15 | 10 | NaN |
| 15grd5678@87.asc | 0.38  | 0.15 | chb  | 1569  | 948   | grd8  | SAF 521-15 | 11 | NaN |
| 15grd5678@88.asc | 0.46  | 0.14 | chb  | 1669  | 948   | grd8  | SAF 521-15 | 12 | NaN |
| 15grd5678@89.asc | 0.20  | 0.15 | chb  | 1669  | 1048  | grd8  | SAF 521-15 | 13 | NaN |
| 15grd5678@90.asc | 1.01  | 0.23 | chb  | 1569  | 1048  | grd8  | SAF 521-15 | 14 | NaN |
| 15grd5678@91.asc | -0.85 | 0.12 | vein | 1469  | 1048  | grd8  | SAF 521-15 | 15 | NaN |
| 15grd5678@92.asc | -0.74 | 0.15 | vein | 1369  | 1048  | grd8  | SAF 521-15 | 16 | NaN |
| 15grd9@1.asc     | 1.13  | 0.17 | chm  | -1791 | -6491 | grd9  | SAF 521-15 | 1  | NaN |
| 15grd9@2.asc     | 0.68  | 0.13 | chm  | -1716 | -6491 | grd9  | SAF 521-15 | 2  | NaN |
| 15grd9@3.asc     | 0.14  | 0.14 | chm  | -1716 | -6391 | grd9  | SAF 521-15 | 3  | NaN |
| 15grd9@4.asc     | 0.51  | 0.15 | chm  | -1791 | -6391 | grd9  | SAF 521-15 | 4  | NaN |
| 15grd9@5.asc     | 0.07  | 0.17 | chg  | -1791 | -6291 | grd9  | SAF 521-15 | 5  | NaN |
| 15grd9@6.asc     | 0.09  | 0.18 | chg  | -1716 | -6291 | grd9  | SAF 521-15 | 6  | NaN |
| 15grd9@7.asc     | -0.03 | 0.22 | chg  | -1716 | -6191 | grd9  | SAF 521-15 | 7  | NaN |
| 15grd9@8.asc     | 0.18  | 0.20 | chg  | -1791 | -6191 | grd9  | SAF 521-15 | 8  | NaN |
| 15grd9@9.asc     | 0.63  | 0.14 | chg  | -1791 | -6091 | grd9  | SAF 521-15 | 9  | NaN |
| 15grd9@10.asc    | 0.09  | 0.16 | chg  | -1716 | -6091 | grd9  | SAF 521-15 | 10 | NaN |
| 15grd9@11.asc    | 0.51  | 0.18 | chm  | -1716 | -5991 | grd9  | SAF 521-15 | 11 | NaN |
| 15grd9@12.asc    | 0.49  | 0.18 | chm  | -1791 | -5991 | grd9  | SAF 521-15 | 12 | NaN |
| 15grd9@13.asc    | -0.28 | 0.15 | chm  | -1791 | -5891 | grd9  | SAF 521-15 | 13 | NaN |
| 15grd9@14.asc    | 0.32  | 0.18 | chm  | -1716 | -5891 | grd9  | SAF 521-15 | 14 | NaN |
| 15grd9@15.asc    | 0.10  | 0.16 | chm  | -1716 | -5791 | grd9  | SAF 521-15 | 15 | NaN |
| 15grd9@16.asc    | -0.12 | 0.20 | chm  | -1791 | -5791 | grd9  | SAF 521-15 | 16 | NaN |
| 15grd10@1.asc    | 0.69  | 0.21 | chm  | -3524 | -6389 | grd10 | SAF 521-15 | 1  | NaN |
| 15grd10@2.asc    | 1.00  | 0.16 | chm  | -3424 | -6389 | grd10 | SAF 521-15 | 2  | NaN |
| 15grd10@3.asc    | 0.95  | 0.15 | chm  | -3424 | -6289 | grd10 | SAF 521-15 | 3  | NaN |
| 15grd10@4.asc    | 0.40  | 0.18 | chm  | -3524 | -6289 | grd10 | SAF 521-15 | 4  | NaN |
| 15grd10@5.asc    | 0.42  | 0.15 | chm  | -3524 | -6189 | grd10 | SAF 521-15 | 5  | NaN |
| 15grd10@6.asc    | 0.64  | 0.19 | chg  | -3424 | -6189 | grd10 | SAF 521-15 | 6  | NaN |
| 15grd10@7.asc    | 0.47  | 0.16 | chg  | -3424 | -6089 | grd10 | SAF 521-15 | 7  | NaN |
| 15grd10@8.asc    | 0.67  | 0.18 | chg  | -3524 | -6089 | grd10 | SAF 521-15 | 8  | NaN |
| 15grd10@9.asc    | 0.56  | 0.20 | chg  | -3524 | -5989 | grd10 | SAF 521-15 | 9  | NaN |
| 15grd10@10.asc   | 0.88  | 0.20 | chg  | -3424 | -5989 | grd10 | SAF 521-15 | 10 | NaN |
| 15grd10@11.asc   | 0.65  | 0.15 | chm  | -3424 | -5889 | grd10 | SAF 521-15 | 11 | NaN |

|                   |       |      |        |       |       |       |            |    |     |
|-------------------|-------|------|--------|-------|-------|-------|------------|----|-----|
| 15grd10@12.asc    | 1.17  | 0.21 | chm    | -3524 | -5889 | grd10 | SAF 521-15 | 12 | NaN |
| 15grd10@13.asc    | 1.05  | 0.17 | chg    | -3524 | -5789 | grd10 | SAF 521-15 | 13 | NaN |
| 15grd10@14.asc    | 0.50  | 0.18 | chg    | -3424 | -5789 | grd10 | SAF 521-15 | 14 | NaN |
| 15grd10@15.asc    | 0.34  | 0.32 | chg    | -3424 | -5689 | grd10 | SAF 521-15 | 15 | NaN |
| 15grd10@16.asc    | 0.70  | 0.14 | chg    | -3524 | -5689 | grd10 | SAF 521-15 | 16 | NaN |
| 15grd11-15@1.asc  | 1.17  | 0.18 | chm    | -2625 | -5469 | grd11 | SAF 521-15 | 1  | NaN |
| 15grd11-15@2.asc  | 1.11  | 0.16 | chm    | -2525 | -5469 | grd11 | SAF 521-15 | 2  | NaN |
| 15grd11-15@3.asc  | 0.79  | 0.16 | chm    | -2525 | -5369 | grd11 | SAF 521-15 | 3  | NaN |
| 15grd11-15@4.asc  | 0.94  | 0.13 | chm    | -2625 | -5369 | grd11 | SAF 521-15 | 4  | NaN |
| 15grd11-15@5.asc  | 0.72  | 0.13 | chg    | -2625 | -5269 | grd11 | SAF 521-15 | 5  | NaN |
| 15grd11-15@6.asc  | 0.75  | 0.18 | chg    | -2525 | -5269 | grd11 | SAF 521-15 | 6  | NaN |
| 15grd11-15@7.asc  | 1.23  | 0.13 | chg    | -2525 | -5169 | grd11 | SAF 521-15 | 7  | NaN |
| 15grd11-15@8.asc  | 0.48  | 0.12 | chg    | -2625 | -5169 | grd11 | SAF 521-15 | 8  | NaN |
| 15grd11-15@9.asc  | 0.55  | 0.14 | chm    | -2625 | -5069 | grd11 | SAF 521-15 | 9  | NaN |
| 15grd11-15@10.asc | 0.44  | 0.26 | chg    | -2525 | -5069 | grd11 | SAF 521-15 | 10 | NaN |
| 15grd11-15@11.asc | 0.77  | 0.14 | chg    | -2525 | -4969 | grd11 | SAF 521-15 | 11 | NaN |
| 15grd11-15@12.asc | 0.51  | 0.13 | chg    | -2625 | -4969 | grd11 | SAF 521-15 | 12 | NaN |
| 15grd11-15@13.asc | 0.63  | 0.12 | chm    | -2625 | -4869 | grd11 | SAF 521-15 | 13 | NaN |
| 15grd11-15@14.asc | 0.99  | 0.14 | chm    | -2525 | -4869 | grd11 | SAF 521-15 | 14 | NaN |
| 15grd11-15@15.asc | 0.83  | 0.16 | chm    | -2525 | -4769 | grd11 | SAF 521-15 | 15 | NaN |
| 15grd11-15@16.asc | 0.44  | 0.16 | vein   | -2625 | -4769 | grd11 | SAF 521-15 | 16 | NaN |
| 15grd11-15@20.asc | 0.10  | 0.31 | cement | -3237 | -3679 | grd12 | SAF 521-15 | 1  | NaN |
| 15grd11-15@21.asc | -0.21 | 0.17 | cement | -3137 | -3679 | grd12 | SAF 521-15 | 2  | NaN |
| 15grd11-15@22.asc | 0.44  | 0.17 | cement | -3137 | -3579 | grd12 | SAF 521-15 | 3  | NaN |
| 15grd11-15@23.asc | 0.18  | 0.23 | cement | -3237 | -3579 | grd12 | SAF 521-15 | 4  | NaN |
| 15grd11-15@24.asc | 0.15  | 0.14 | cement | -3237 | -3479 | grd12 | SAF 521-15 | 5  | NaN |
| 15grd11-15@25.asc | 0.41  | 0.17 | cement | -3137 | -3479 | grd12 | SAF 521-15 | 6  | NaN |
| 15grd11-15@26.asc | 0.27  | 0.20 | cement | -3137 | -3379 | grd12 | SAF 521-15 | 7  | NaN |
| 15grd11-15@27.asc | -0.05 | 0.14 | cement | -3237 | -3379 | grd12 | SAF 521-15 | 8  | NaN |
| 15grd11-15@28.asc | 0.56  | 0.12 | cement | -3237 | -3279 | grd12 | SAF 521-15 | 9  | NaN |
| 15grd11-15@29.asc | 0.77  | 0.14 | cement | -3137 | -3279 | grd12 | SAF 521-15 | 10 | NaN |
| 15grd11-15@30.asc | 0.28  | 0.16 | cement | -3137 | -3179 | grd12 | SAF 521-15 | 11 | NaN |
| 15grd11-15@31.asc | 0.65  | 0.16 | cement | -3237 | -3179 | grd12 | SAF 521-15 | 12 | NaN |
| 15grd11-15@32.asc | 0.72  | 0.16 | cement | -3237 | -3079 | grd12 | SAF 521-15 | 13 | NaN |
| 15grd11-15@33.asc | 0.52  | 0.18 | cement | -3137 | -3079 | grd12 | SAF 521-15 | 14 | NaN |
| 15grd11-15@34.asc | 0.32  | 0.16 | carbg  | -3137 | -2979 | grd12 | SAF 521-15 | 15 | NaN |
| 15grd11-15@35.asc | 0.48  | 0.18 | carbg  | -3237 | -2979 | grd12 | SAF 521-15 | 16 | NaN |
| 15grd11-15@39.asc | 1.82  | 0.17 | chm    | -4270 | -4586 | grd13 | SAF 521-15 | 1  | NaN |
| 15grd11-15@40.asc | 1.20  | 0.17 | chm    | -4170 | -4586 | grd13 | SAF 521-15 | 2  | NaN |
| 15grd11-15@41.asc | 1.08  | 0.22 | chm    | -4170 | -4486 | grd13 | SAF 521-15 | 3  | NaN |
| 15grd11-15@42.asc | 0.80  | 0.19 | chm    | -4270 | -4486 | grd13 | SAF 521-15 | 4  | NaN |
| 15grd11-15@43.asc | 1.36  | 0.22 | chm    | -4270 | -4386 | grd13 | SAF 521-15 | 5  | NaN |
| 15grd11-15@44.asc | 0.89  | 0.23 | chm    | -4170 | -4386 | grd13 | SAF 521-15 | 6  | NaN |
| 15grd11-15@45.asc | 2.10  | 0.27 | chg    | -4170 | -4286 | grd13 | SAF 521-15 | 7  | NaN |
| 15grd11-15@46.asc | 1.17  | 0.24 | chg    | -4270 | -4286 | grd13 | SAF 521-15 | 8  | NaN |
| 15grd11-15@47.asc | 0.82  | 0.27 | chg    | -4270 | -4186 | grd13 | SAF 521-15 | 9  | NaN |
| 15grd11-15@48.asc | 0.31  | 0.30 | chg    | -4170 | -4186 | grd13 | SAF 521-15 | 10 | NaN |

|                   |        |      |       |       |       |       |            |    |     |
|-------------------|--------|------|-------|-------|-------|-------|------------|----|-----|
| 15grd11-15@49.asc | 1.36   | 0.35 | chm   | -4170 | -4086 | grd13 | SAF 521-15 | 11 | NaN |
| 15grd11-15@50.asc | 1.20   | 0.30 | chm   | -4270 | -4086 | grd13 | SAF 521-15 | 12 | NaN |
| 15grd11-15@51.asc | 0.72   | 0.19 | chg   | -4270 | -3986 | grd13 | SAF 521-15 | 13 | NaN |
| 15grd11-15@52.asc | 0.57   | 0.18 | chg   | -4170 | -3986 | grd13 | SAF 521-15 | 14 | NaN |
| 15grd11-15@53.asc | 0.75   | 0.18 | chg   | -4170 | -3886 | grd13 | SAF 521-15 | 15 | NaN |
| 15grd11-15@54.asc | 0.68   | 0.25 | chg   | -4270 | -3886 | grd13 | SAF 521-15 | 16 | NaN |
| 15grd11-15@58.asc | 0.55   | 0.29 | chg   | 2187  | -1227 | grd14 | SAF 521-15 | 1  | NaN |
| 15grd11-15@59.asc | 0.57   | 0.22 | chg   | 2287  | -1227 | grd14 | SAF 521-15 | 2  | NaN |
| 15grd11-15@60.asc | -0.26  | 0.22 | volc? | 2287  | -1127 | grd14 | SAF 521-15 | 3  | NaN |
| 15grd11-15@61.asc | -0.18  | 0.32 | volc? | 2187  | -1127 | grd14 | SAF 521-15 | 4  | NaN |
| 15grd11-15@62.asc | 0.82   | 0.26 | volc? | 2187  | -1027 | grd14 | SAF 521-15 | 5  | NaN |
| 15grd11-15@63.asc | 0.01   | 0.31 | chm   | 2287  | -1027 | grd14 | SAF 521-15 | 6  | NaN |
| 15grd11-15@64.asc | 0.68   | 0.20 | carbg | 2287  | -927  | grd14 | SAF 521-15 | 7  | NaN |
| 15grd11-15@65.asc | 0.14   | 0.20 | volc? | 2187  | -927  | grd14 | SAF 521-15 | 8  | NaN |
| 15grd11-15@66.asc | -11.77 | 0.56 | volc? | 2187  | -827  | grd14 | SAF 521-15 | 9  | NaN |
| 15grd11-15@67.asc | 1.24   | 0.26 | volc? | 2287  | -827  | grd14 | SAF 521-15 | 10 | NaN |
| 15grd11-15@68.asc | -10.76 | 0.52 | volc? | 2287  | -727  | grd14 | SAF 521-15 | 11 | NaN |
| 15grd11-15@69.asc | 0.82   | 0.23 | carbg | 2187  | -727  | grd14 | SAF 521-15 | 12 | NaN |
| 15grd11-15@70.asc | 1.14   | 0.20 | carbg | 2187  | -627  | grd14 | SAF 521-15 | 13 | NaN |
| 15grd11-15@71.asc | 1.71   | 0.22 | chg   | 2287  | -627  | grd14 | SAF 521-15 | 14 | NaN |
| 15grd11-15@72.asc | 1.64   | 0.22 | carbg | 2287  | -527  | grd14 | SAF 521-15 | 15 | NaN |
| 15grd11-15@73.asc | 1.04   | 0.29 | chm   | 2187  | -527  | grd14 | SAF 521-15 | 16 | NaN |
| 15grd11-15@77.asc | 1.03   | 0.29 | chg   | 3273  | -1432 | grd15 | SAF 521-15 | 1  | NaN |
| 15grd11-15@78.asc | 0.95   | 0.41 | chg   | 3373  | -1432 | grd15 | SAF 521-15 | 2  | NaN |
| 15grd11-15@79.asc | 1.04   | 0.26 | chg   | 3473  | -1432 | grd15 | SAF 521-15 | 3  | NaN |
| 15grd11-15@80.asc | 0.72   | 0.29 | chg   | 3573  | -1432 | grd15 | SAF 521-15 | 4  | NaN |
| 15grd11-15@81.asc | 0.99   | 0.27 | chg   | 3573  | -1332 | grd15 | SAF 521-15 | 5  | NaN |
| 15grd11-15@82.asc | 0.84   | 0.30 | chg   | 3473  | -1332 | grd15 | SAF 521-15 | 6  | NaN |
| 15grd11-15@83.asc | 1.00   | 0.24 | chg   | 3373  | -1332 | grd15 | SAF 521-15 | 7  | NaN |
| 15grd11-15@84.asc | 1.51   | 0.19 | chg   | 3273  | -1332 | grd15 | SAF 521-15 | 8  | NaN |
| 15grd11-15@85.asc | 0.76   | 0.28 | chg   | 3273  | -1232 | grd15 | SAF 521-15 | 9  | NaN |
| 15grd11-15@86.asc | 0.61   | 0.23 | chg   | 3373  | -1232 | grd15 | SAF 521-15 | 10 | NaN |
| 15grd11-15@87.asc | -0.06  | 0.21 | chg   | 3473  | -1232 | grd15 | SAF 521-15 | 11 | NaN |
| 15grd11-15@88.asc | 0.66   | 0.21 | chg   | 3573  | -1232 | grd15 | SAF 521-15 | 12 | NaN |
| 15grd11-15@89.asc | 0.96   | 0.25 | chg   | 3573  | -1132 | grd15 | SAF 521-15 | 13 | NaN |
| 15grd11-15@90.asc | 0.70   | 0.23 | chg   | 3473  | -1132 | grd15 | SAF 521-15 | 14 | NaN |
| 15grd11-15@91.asc | 0.51   | 0.33 | chg   | 3373  | -1132 | grd15 | SAF 521-15 | 15 | NaN |
| 15grd11-15@92.asc | 0.86   | 0.22 | chg   | 3273  | -1132 | grd15 | SAF 521-15 | 16 | NaN |
| 16grd1@1.asc      | 0.89   | 0.24 | chg   | -4431 | 4725  | grd1  | SAF 521-16 | 1  | NaN |
| 16grd1@2.asc      | 0.80   | 0.21 | chg   | -4331 | 4725  | grd1  | SAF 521-16 | 2  | NaN |
| 16grd1@3.asc      | 0.66   | 0.18 | chg   | -4231 | 4725  | grd1  | SAF 521-16 | 3  | NaN |
| 16grd1@4.asc      | 0.09   | 0.22 | chg   | -4131 | 4725  | grd1  | SAF 521-16 | 4  | NaN |
| 16grd1@5.asc      | 0.28   | 0.18 | chg   | -4131 | 4825  | grd1  | SAF 521-16 | 5  | NaN |
| 16grd1@6.asc      | 0.97   | 0.21 | chm   | -4231 | 4825  | grd1  | SAF 521-16 | 6  | NaN |
| 16grd1@7.asc      | 0.79   | 0.19 | chg   | -4331 | 4825  | grd1  | SAF 521-16 | 7  | NaN |
| 16grd1@8.asc      | 0.47   | 0.19 | chg   | -4431 | 4825  | grd1  | SAF 521-16 | 8  | NaN |
| 16grd1@9.asc      | 0.59   | 0.18 | chg   | -4431 | 4925  | grd1  | SAF 521-16 | 9  | NaN |

|                 |      |      |       |       |      |      |            |    |     |
|-----------------|------|------|-------|-------|------|------|------------|----|-----|
| 16grd1@10.asc   | 0.30 | 0.22 | chg   | -4331 | 4925 | grd1 | SAF 521-16 | 10 | NaN |
| 16grd1@11.asc   | 0.63 | 0.18 | chg   | -4231 | 4925 | grd1 | SAF 521-16 | 11 | NaN |
| 16grd1@12.asc   | 2.20 | 0.17 | chm   | -4131 | 4925 | grd1 | SAF 521-16 | 12 | NaN |
| 16grd1@13.asc   | 0.76 | 0.16 | chm   | -4131 | 5025 | grd1 | SAF 521-16 | 13 | NaN |
| 16grd1@14.asc   | 0.75 | 0.21 | chm   | -4231 | 5025 | grd1 | SAF 521-16 | 14 | NaN |
| 16grd1@15.asc   | 0.91 | 0.24 | chg   | -4331 | 5025 | grd1 | SAF 521-16 | 15 | NaN |
| 16grd1@16.asc   | 1.71 | 0.16 | chg   | -4431 | 5025 | grd1 | SAF 521-16 | 16 | NaN |
| 16grd2@1.asc    | 0.74 | 0.25 | carbm | -1161 | 821  | grd2 | SAF 521-16 | 1  | NaN |
| 16grd2@2.asc    | 0.23 | 0.18 | chg   | -1061 | 821  | grd2 | SAF 521-16 | 2  | NaN |
| 16grd2@3.asc    | 0.72 | 0.17 | chg   | -961  | 821  | grd2 | SAF 521-16 | 3  | NaN |
| 16grd2@4.asc    | 0.68 | 0.28 | carbm | -861  | 821  | grd2 | SAF 521-16 | 4  | NaN |
| 16grd2@5.asc    | 0.46 | 0.20 | chg   | -861  | 921  | grd2 | SAF 521-16 | 5  | NaN |
| 16grd2@6.asc    | 0.58 | 0.19 | chg   | -961  | 921  | grd2 | SAF 521-16 | 6  | NaN |
| 16grd2@7.asc    | 0.10 | 0.18 | chg   | -1061 | 921  | grd2 | SAF 521-16 | 7  | NaN |
| 16grd2@8.asc    | 1.10 | 0.20 | chg   | -1161 | 921  | grd2 | SAF 521-16 | 8  | NaN |
| 16grd2@9.asc    | 0.97 | 0.31 | chg   | -1161 | 1021 | grd2 | SAF 521-16 | 9  | NaN |
| 16grd2@10.asc   | 0.16 | 0.23 | chg   | -1061 | 1021 | grd2 | SAF 521-16 | 10 | NaN |
| 16grd2@11.asc   | 0.08 | 0.18 | chg   | -961  | 1021 | grd2 | SAF 521-16 | 11 | NaN |
| 16grd2@12.asc   | 0.39 | 0.19 | chg   | -861  | 1021 | grd2 | SAF 521-16 | 12 | NaN |
| 16grd2@13.asc   | 0.00 | 0.22 | chg   | -861  | 1121 | grd2 | SAF 521-16 | 13 | NaN |
| 16grd2@14.asc   | 0.78 | 0.18 | chg   | -961  | 1121 | grd2 | SAF 521-16 | 14 | NaN |
| 16grd2@15.asc   | 0.22 | 0.27 | chg   | -1061 | 1121 | grd2 | SAF 521-16 | 15 | NaN |
| 16grd2@16.asc   | 0.67 | 0.16 | carbm | -1161 | 1121 | grd2 | SAF 521-16 | 16 | NaN |
| 16grd3@1.asc    | 1.33 | 0.23 | chg   | -1400 | 260  | grd3 | SAF 521-16 | 1  | NaN |
| 16grd3@2.asc    | 1.75 | 0.20 | carbg | -1300 | 260  | grd3 | SAF 521-16 | 2  | NaN |
| 16grd3@3.asc    | 1.03 | 0.20 | chg   | -1200 | 260  | grd3 | SAF 521-16 | 3  | NaN |
| 16grd3@4.asc    | 1.47 | 0.20 | carbm | -1100 | 260  | grd3 | SAF 521-16 | 4  | NaN |
| 16grd3@5.asc    | 1.50 | 0.17 | chm   | -1100 | 360  | grd3 | SAF 521-16 | 5  | NaN |
| 16grd3@6.asc    | 1.64 | 0.21 | chm   | -1200 | 360  | grd3 | SAF 521-16 | 6  | NaN |
| 16grd3@7.asc    | 1.22 | 0.18 | carbm | -1300 | 360  | grd3 | SAF 521-16 | 7  | NaN |
| 16grd3@8.asc    | 1.63 | 0.18 | carbm | -1400 | 360  | grd3 | SAF 521-16 | 8  | NaN |
| 16grd3@9.asc    | 1.34 | 0.18 | carbm | -1400 | 460  | grd3 | SAF 521-16 | 9  | NaN |
| 16grd3@10.asc   | 1.62 | 0.17 | chg   | -1300 | 460  | grd3 | SAF 521-16 | 10 | NaN |
| 16grd3@11.asc   | 1.52 | 0.19 | chg   | -1200 | 460  | grd3 | SAF 521-16 | 11 | NaN |
| 16grd3@12.asc   | 1.37 | 0.19 | chg   | -1100 | 460  | grd3 | SAF 521-16 | 12 | NaN |
| 16grd3@13.asc   | 1.27 | 0.17 | chg   | -1100 | 560  | grd3 | SAF 521-16 | 13 | NaN |
| 16grd3@14.asc   | 0.85 | 0.21 | carbm | -1200 | 560  | grd3 | SAF 521-16 | 14 | NaN |
| 16grd3@15.asc   | 1.23 | 0.21 | carbm | -1300 | 560  | grd3 | SAF 521-16 | 15 | NaN |
| 16grd3@16.asc   | 0.84 | 0.20 | carbm | -1400 | 560  | grd3 | SAF 521-16 | 16 | NaN |
| 16grd4567@1.asc | 1.59 | 0.25 | chg   | -987  | 250  | grd4 | SAF 521-16 | 1  | NaN |
| 16grd4567@2.asc | 1.13 | 0.24 | chg   | -887  | 250  | grd4 | SAF 521-16 | 2  | NaN |
| 16grd4567@3.asc | 0.48 | 0.24 | chg   | -787  | 250  | grd4 | SAF 521-16 | 3  | NaN |
| 16grd4567@4.asc | 2.08 | 0.19 | carbm | -687  | 250  | grd4 | SAF 521-16 | 4  | NaN |
| 16grd4567@5.asc | 1.95 | 0.21 | vein  | -687  | 350  | grd4 | SAF 521-16 | 5  | NaN |
| 16grd4567@6.asc | 1.67 | 0.20 | chm   | -787  | 350  | grd4 | SAF 521-16 | 6  | NaN |
| 16grd4567@7.asc | 1.32 | 0.20 | carbm | -887  | 350  | grd4 | SAF 521-16 | 7  | NaN |
| 16grd4567@8.asc | 1.67 | 0.20 | carbm | -987  | 350  | grd4 | SAF 521-16 | 8  | NaN |

|                  |       |      |        |       |      |      |            |    |     |
|------------------|-------|------|--------|-------|------|------|------------|----|-----|
| 16grd4567@9.asc  | 1.14  | 0.24 | chg    | -987  | 450  | grd4 | SAF 521-16 | 9  | NaN |
| 16grd4567@10.asc | 1.38  | 0.35 | chg    | -887  | 450  | grd4 | SAF 521-16 | 10 | NaN |
| 16grd4567@11.asc | 0.21  | 0.41 | chg    | -787  | 450  | grd4 | SAF 521-16 | 11 | NaN |
| 16grd4567@12.asc | 1.36  | 0.26 | chg    | -687  | 450  | grd4 | SAF 521-16 | 12 | NaN |
| 16grd4567@13.asc | 0.95  | 0.26 | chg    | -687  | 550  | grd4 | SAF 521-16 | 13 | NaN |
| 16grd4567@14.asc | 0.92  | 0.33 | chg    | -787  | 550  | grd4 | SAF 521-16 | 14 | NaN |
| 16grd4567@15.asc | 0.60  | 0.30 | chg    | -887  | 550  | grd4 | SAF 521-16 | 15 | NaN |
| 16grd4567@16.asc | 0.70  | 0.22 | chg    | -987  | 550  | grd4 | SAF 521-16 | 16 | NaN |
| 16grd4567@20.asc | 1.43  | 0.23 | carb   | -1927 | 1187 | grd5 | SAF 521-16 | 1  | NaN |
| 16grd4567@21.asc | 1.45  | 0.23 | chm    | -1827 | 1187 | grd5 | SAF 521-16 | 2  | NaN |
| 16grd4567@22.asc | 1.39  | 0.26 | carb   | -1727 | 1187 | grd5 | SAF 521-16 | 3  | NaN |
| 16grd4567@23.asc | 1.68  | 0.29 | carb   | -1627 | 1187 | grd5 | SAF 521-16 | 4  | NaN |
| 16grd4567@24.asc | 1.29  | 0.22 | carb   | -1627 | 1287 | grd5 | SAF 521-16 | 5  | NaN |
| 16grd4567@25.asc | 0.26  | 0.27 | chm    | -1727 | 1287 | grd5 | SAF 521-16 | 6  | NaN |
| 16grd4567@26.asc | 0.92  | 0.21 | chm    | -1827 | 1287 | grd5 | SAF 521-16 | 7  | NaN |
| 16grd4567@27.asc | 1.89  | 0.23 | chm    | -1927 | 1287 | grd5 | SAF 521-16 | 8  | NaN |
| 16grd4567@28.asc | 0.57  | 0.19 | carb   | -1927 | 1387 | grd5 | SAF 521-16 | 9  | NaN |
| 16grd4567@29.asc | 1.40  | 0.21 | chm    | -1827 | 1387 | grd5 | SAF 521-16 | 10 | NaN |
| 16grd4567@30.asc | 0.75  | 0.19 | cement | -1727 | 1387 | grd5 | SAF 521-16 | 11 | NaN |
| 16grd4567@31.asc | -0.94 | 0.21 | cement | -1627 | 1387 | grd5 | SAF 521-16 | 12 | NaN |
| 16grd4567@32.asc | -1.20 | 0.22 | cement | -1627 | 1487 | grd5 | SAF 521-16 | 13 | NaN |
| 16grd4567@33.asc | 1.04  | 0.30 | chg    | -1727 | 1487 | grd5 | SAF 521-16 | 14 | NaN |
| 16grd4567@34.asc | 1.61  | 0.30 | carb   | -1827 | 1487 | grd5 | SAF 521-16 | 15 | NaN |
| 16grd4567@35.asc | 0.14  | 0.21 | carb   | -1927 | 1487 | grd5 | SAF 521-16 | 16 | NaN |
| 16grd4567@39.asc | 1.01  | 0.19 | chm    | -5068 | 4281 | grd6 | SAF 521-16 | 1  | NaN |
| 16grd4567@40.asc | 1.40  | 0.18 | chm    | -4968 | 4281 | grd6 | SAF 521-16 | 2  | NaN |
| 16grd4567@41.asc | 0.97  | 0.21 | chg    | -4868 | 4281 | grd6 | SAF 521-16 | 3  | NaN |
| 16grd4567@42.asc | 1.49  | 0.26 | chm    | -4768 | 4281 | grd6 | SAF 521-16 | 4  | NaN |
| 16grd4567@43.asc | 0.85  | 0.31 | chm    | -4668 | 4281 | grd6 | SAF 521-16 | 5  | NaN |
| 16grd4567@44.asc | 0.86  | 0.24 | chm    | -4568 | 4281 | grd6 | SAF 521-16 | 6  | NaN |
| 16grd4567@45.asc | 0.95  | 0.19 | chm    | -4468 | 4281 | grd6 | SAF 521-16 | 7  | NaN |
| 16grd4567@46.asc | 1.43  | 0.39 | chg    | -4368 | 4281 | grd6 | SAF 521-16 | 8  | NaN |
| 16grd4567@47.asc | 0.71  | 0.35 | chm    | -4368 | 4381 | grd6 | SAF 521-16 | 9  | NaN |
| 16grd4567@48.asc | 0.75  | 0.19 | chm    | -4468 | 4381 | grd6 | SAF 521-16 | 10 | NaN |
| 16grd4567@49.asc | 3.74  | 0.41 | chm    | -4568 | 4381 | grd6 | SAF 521-16 | 11 | NaN |
| 16grd4567@50.asc | 1.41  | 0.36 | chg    | -4668 | 4381 | grd6 | SAF 521-16 | 12 | NaN |
| 16grd4567@51.asc | 0.88  | 0.41 | chm    | -4768 | 4381 | grd6 | SAF 521-16 | 13 | NaN |
| 16grd4567@52.asc | 0.94  | 0.36 | chm    | -4868 | 4381 | grd6 | SAF 521-16 | 14 | NaN |
| 16grd4567@53.asc | 1.93  | 0.50 | chm    | -4968 | 4381 | grd6 | SAF 521-16 | 15 | NaN |
| 16grd4567@54.asc | 1.22  | 0.38 | chm    | -5068 | 4381 | grd6 | SAF 521-16 | 16 | NaN |
| 16grd4567@58.asc | 1.39  | 0.30 | chm    | -5068 | 4481 | grd7 | SAF 521-16 | 1  | NaN |
| 16grd4567@59.asc | 0.91  | 0.36 | chm    | -4968 | 4481 | grd7 | SAF 521-16 | 2  | NaN |
| 16grd4567@60.asc | 0.96  | 0.30 | chg    | -4868 | 4481 | grd7 | SAF 521-16 | 3  | NaN |
| 16grd4567@61.asc | 1.52  | 0.35 | chm    | -4768 | 4481 | grd7 | SAF 521-16 | 4  | NaN |
| 16grd4567@62.asc | 1.08  | 0.33 | chm    | -4668 | 4481 | grd7 | SAF 521-16 | 5  | NaN |
| 16grd4567@63.asc | 1.27  | 0.34 | chg    | -4568 | 4481 | grd7 | SAF 521-16 | 6  | NaN |
| 16grd4567@64.asc | 0.17  | 0.22 | chm    | -4468 | 4481 | grd7 | SAF 521-16 | 7  | NaN |

|                    |       |      |     |       |      |       |            |    |     |
|--------------------|-------|------|-----|-------|------|-------|------------|----|-----|
| 16grd4567@65.asc   | 0.97  | 0.22 | chm | -4368 | 4481 | grd7  | SAF 521-16 | 8  | NaN |
| 16grd4567@66.asc   | 0.92  | 0.22 | chg | -4368 | 4581 | grd7  | SAF 521-16 | 9  | NaN |
| 16grd4567@67.asc   | 1.07  | 0.21 | chm | -4468 | 4581 | grd7  | SAF 521-16 | 10 | NaN |
| 16grd4567@68.asc   | 0.91  | 0.18 | chm | -4568 | 4581 | grd7  | SAF 521-16 | 11 | NaN |
| 16grd4567@69.asc   | 1.84  | 0.25 | chm | -4668 | 4581 | grd7  | SAF 521-16 | 12 | NaN |
| 16grd4567@70.asc   | 0.60  | 0.30 | chm | -4768 | 4581 | grd7  | SAF 521-16 | 13 | NaN |
| 16grd4567@71.asc   | 1.02  | 0.19 | chm | -4868 | 4581 | grd7  | SAF 521-16 | 14 | NaN |
| 16grd4567@72.asc   | 1.63  | 0.26 | chm | -4968 | 4581 | grd7  | SAF 521-16 | 15 | NaN |
| 16grd4567@73.asc   | 1.01  | 0.22 | chm | -5068 | 4581 | grd7  | SAF 521-16 | 16 | NaN |
| 16grd4567@77.asc   | 0.03  | 0.37 | chg | -3467 | 4228 | grd7  | SAF 521-16 | 17 | NaN |
| 16grd4567@78.asc   | 0.99  | 0.54 | chg | -3367 | 4228 | grd7  | SAF 521-16 | 18 | NaN |
| 16grd4567@79.asc   | 1.35  | 0.49 | chg | -3267 | 4228 | grd7  | SAF 521-16 | 19 | NaN |
| 16grd4567@80.asc   | 0.46  | 0.23 | chg | -3167 | 4228 | grd7  | SAF 521-16 | 20 | NaN |
| 16grd4567@81.asc   | 0.89  | 0.34 | chm | -3167 | 4238 | grd7  | SAF 521-16 | 21 | NaN |
| 16grd4567@82.asc   | 0.63  | 0.24 | chg | -3267 | 4238 | grd7  | SAF 521-16 | 22 | NaN |
| 16grd4567@83.asc   | 0.86  | 0.39 | chm | -3367 | 4238 | grd7  | SAF 521-16 | 23 | NaN |
| 16grd4567@84.asc   | 5.18  | 0.37 | chm | -3467 | 4328 | grd7  | SAF 521-16 | 24 | NaN |
| 16grd4567@85.asc   | 0.36  | 0.51 | chm | -3467 | 4438 | grd7  | SAF 521-16 | 25 | NaN |
| 16grd4567@86.asc   | 0.27  | 0.57 | chg | -3367 | 4438 | grd7  | SAF 521-16 | 26 | NaN |
| 16grd4567@87.asc   | 1.52  | 0.40 | chg | -3267 | 4438 | grd7  | SAF 521-16 | 27 | NaN |
| 16grd4567@88.asc   | 0.79  | 0.63 | chg | -3167 | 4438 | grd7  | SAF 521-16 | 28 | NaN |
| 16grd4567@89.asc   | 2.48  | 0.65 | chg | -3167 | 4528 | grd7  | SAF 521-16 | 29 | NaN |
| 16grd4567@90.asc   | 0.91  | 0.36 | chg | -3267 | 4528 | grd7  | SAF 521-16 | 30 | NaN |
| 16grd4567@91.asc   | 0.77  | 0.52 | chg | -3367 | 4528 | grd7  | SAF 521-16 | 31 | NaN |
| 16grd4567@92.asc   | 1.16  | 0.48 | chm | -3467 | 4528 | grd7  | SAF 521-16 | 32 | NaN |
| BH039_grd6b@1.asc  | 1.428 | 0.3  | chb | -3643 | 5099 | grd6b | BH-03-9    | 1  | NaN |
| BH039_grd6b@2.asc  | 1.545 | 0.4  | chb | -3543 | 5099 | grd6b | BH-03-9    | 2  | NaN |
| BH039_grd6b@3.asc  | 1.664 | 0.3  | chb | -3543 | 5206 | grd6b | BH-03-9    | 3  | NaN |
| BH039_grd6b@4.asc  | 0.471 | 0.3  | chb | -3643 | 5206 | grd6b | BH-03-9    | 4  | NaN |
| BH039_grd6b@5.asc  | 1.41  | 0.3  | chb | -3643 | 5313 | grd6b | BH-03-9    | 5  | NaN |
| BH039_grd6b@6.asc  | 1.305 | 0.3  | chb | -3543 | 5313 | grd6b | BH-03-9    | 6  | NaN |
| BH039_grd6b@7.asc  | 0.879 | 0.4  | chb | -3543 | 5420 | grd6b | BH-03-9    | 7  | NaN |
| BH039_grd6b@8.asc  | 1.059 | 0.3  | chb | -3643 | 5420 | grd6b | BH-03-9    | 8  | NaN |
| BH039_grd6b@9.asc  | 0.952 | 0.3  | chb | -3643 | 5527 | grd6b | BH-03-9    | 9  | NaN |
| BH039_grd6b@10.asc | 2.093 | 0.3  | chb | -3543 | 5527 | grd6b | BH-03-9    | 10 | NaN |
| BH039_grd6b@11.asc | 0.859 | 0.3  | chb | -3543 | 5633 | grd6b | BH-03-9    | 11 | NaN |
| BH039_grd6b@12.asc | 1.161 | 0.3  | chb | -3643 | 5633 | grd6b | BH-03-9    | 12 | NaN |
| BH039_grd6b@13.asc | 1.647 | 0.3  | chb | -3643 | 5740 | grd6b | BH-03-9    | 13 | NaN |
| BH039_grd6b@14.asc | 1.389 | 0.3  | chb | -3543 | 5740 | grd6b | BH-03-9    | 14 | NaN |
| BH039_grd6b@15.asc | 1.557 | 0.3  | chb | -3543 | 5847 | grd6b | BH-03-9    | 15 | NaN |

**Table EA3 - O isotope data**

| filename              | d18O  | 1sigma | texture | x     | y     | grd code   | sample   | spot# | Figure |
|-----------------------|-------|--------|---------|-------|-------|------------|----------|-------|--------|
| BRC012_grd5b@1.asc    | 21.05 | 0.19   | cav     | -6212 | 3020  | grd5b      | BRC-01-2 | 1     | Fig07  |
| BRC012_grd5b@2.asc    | 20.89 | 0.20   | cav     | -6205 | 3120  | grd5b      | BRC-01-2 | 2     | Fig07  |
| BRC012_grd5b@3.asc    | 20.68 | 0.16   | cav     | -6181 | 3220  | grd5b      | BRC-01-2 | 3     | Fig07  |
| BRC012_grd5b@4.asc    | 19.31 | 0.16   | chb     | -6138 | 3320  | grd5b      | BRC-01-2 | 4     | Fig07  |
| BRC012_grd5b@5.asc    | -3.20 | 0.18   |         | -6141 | 3420  | grd5b      | BRC-01-2 | 5     | Fig07  |
| BRC012_grd5b@6.asc    | 19.94 | 0.18   | chb     | -6112 | 3520  | grd5b      | BRC-01-2 | 6     | Fig07  |
| BRC012_grd5b@7.asc    | 20.14 | 0.18   | chb     | -6091 | 3620  | grd5b      | BRC-01-2 | 7     | Fig07  |
| BRC012_grd5b@8.asc    | 20.17 | 0.19   | chb     | -6071 | 3732  | grd5b      | BRC-01-2 | 8     | Fig07  |
| BRC012_grd5b@9.asc    | 19.95 | 0.16   | chb     | -6054 | 3845  | grd5b      | BRC-01-2 | 9     | Fig07  |
| BRC012_grd5b@10.asc   | 20.29 | 0.21   | chb     | -6030 | 3947  | grd5b      | BRC-01-2 | 10    | Fig07  |
| BRC012_grd5b@11.asc   | 20.83 | 0.18   | chb     | -5992 | 4049  | grd5b      | BRC-01-2 | 11    | Fig07  |
| BRC012_grd5b@12.asc   | 20.20 | 0.21   | chb     | -5968 | 4150  | grd5b      | BRC-01-2 | 12    | Fig07  |
| BRC012_grd5b@13.asc   | 20.73 | 0.16   | chb     | -5921 | 4250  | grd5b      | BRC-01-2 | 13    | Fig07  |
| BRC012_cavb@1.asc     | 21.97 | 0.19   | cav     | -5946 | NaN   | grdcementb | BRC-01-2 | 1     | Fig06  |
| BRC012_cavb@2.asc     | 22.23 | 0.19   | cav     | -5699 | NaN   | grdcementb | BRC-01-2 | 2     | Fig06  |
| BRC012_cavb@3.asc     | 20.07 | 0.17   | cav     | -5541 | -807  | grdcementb | BRC-01-2 | 3     | Fig06  |
| BRC012_cavb@4.asc     | 20.42 | 0.19   | cav     | -5185 | -1022 | grdcementb | BRC-01-2 | 4     | Fig06  |
| BRC012_cavb@5.asc     | 21.16 | 0.16   | cav     | -4823 | NaN   | grdcementb | BRC-01-2 | 5     | Fig06  |
| BRC012_cavb@6.asc     | 19.67 | 0.18   | cav     | -4619 | -1284 | grdcementb | BRC-01-2 | 6     | Fig06  |
| BRC012_cavb@7.asc     | 18.98 | 0.15   | cav     | -5072 | NaN   | grdcementb | BRC-01-2 | 7     | Fig06  |
| BRC012_cavb@8.asc     | 20.33 | 0.17   | cav     | -5431 | NaN   | grdcementb | BRC-01-2 | 8     | Fig06  |
| BRC012_cavb@9.asc     | 20.50 | 0.16   | cav     | -6031 | -2789 | grdcementb | BRC-01-2 | 9     | Fig06  |
| BRC012_cavb@10.asc    | 19.87 | 0.13   | cav     | -6549 | NaN   | grdcementb | BRC-01-2 | 10    | Fig06  |
| BRC012_grd384b@1.asc  | 20.21 | 0.20   | carb    | -3158 | NaN   | grd3b      | BRC-01-2 | 1     | NaN    |
| BRC012_grd384b@2.asc  | 20.63 | 0.25   | carb    | -3058 | NaN   | grd3b      | BRC-01-2 | 2     | NaN    |
| BRC012_grd384b@3.asc  | 20.31 | 0.21   | carb    | -3058 | NaN   | grd3b      | BRC-01-2 | 3     | NaN    |
| BRC012_grd384b@4.asc  | 19.85 | 0.20   | carb    | -3158 | NaN   | grd3b      | BRC-01-2 | 4     | NaN    |
| BRC012_grd384b@5.asc  | 20.33 | 0.22   | carb    | -3158 | NaN   | grd3b      | BRC-01-2 | 5     | NaN    |
| BRC012_grd384b@6.asc  | 20.02 | 0.20   | carb    | -3058 | NaN   | grd3b      | BRC-01-2 | 6     | NaN    |
| BRC012_grd384b@7.asc  | 20.04 | 0.21   | carb    | -3058 | 8382  | grd3b      | BRC-01-2 | 7     | NaN    |
| BRC012_grd384b@8.asc  | 20.01 | 0.19   | carb    | -3158 | 8382  | grd3b      | BRC-01-2 | 8     | NaN    |
| BRC012_grd384b@9.asc  | 19.45 | 0.23   | carb    | -3158 | NaN   | grd3b      | BRC-01-2 | 9     | NaN    |
| BRC012_grd384b@10.asc | 20.48 | 0.26   | carb    | -3058 | NaN   | grd3b      | BRC-01-2 | 10    | NaN    |
| BRC012_grd384b@14.asc | 20.17 | 0.22   | cav     | 1021  | -1110 | grd8b      | BRC-01-2 | 1     | NaN    |
| BRC012_grd384b@15.asc | 19.55 | 0.24   | cav     | 1121  | -1110 | grd8b      | BRC-01-2 | 2     | NaN    |
| BRC012_grd384b@16.asc | 19.91 | 0.21   | chb     | 1121  | -917  | grd8b      | BRC-01-2 | 3     | NaN    |
| BRC012_grd384b@17.asc | 19.06 | 0.21   | chb     | 1021  | -917  | grd8b      | BRC-01-2 | 4     | NaN    |
| BRC012_grd384b@18.asc | 20.26 | 0.24   | chb     | 1021  | -723  | grd8b      | BRC-01-2 | 5     | NaN    |
| BRC012_grd384b@19.asc | 20.47 | 0.20   | chb     | 1121  | -723  | grd8b      | BRC-01-2 | 6     | NaN    |
| BRC012_grd384b@20.asc | 19.96 | 0.23   | chb     | 1121  | -529  | grd8b      | BRC-01-2 | 7     | NaN    |
| BRC012_grd384b@21.asc | 19.58 | 0.21   | chb     | 1021  | -529  | grd8b      | BRC-01-2 | 8     | NaN    |
| BRC012_grd384b@22.asc | 20.34 | 0.21   | chb     | 1021  | -337  | grd8b      | BRC-01-2 | 9     | NaN    |
| BRC012_grd384b@23.asc | 19.88 | 0.21   | chb     | 1121  | -337  | grd8b      | BRC-01-2 | 10    | NaN    |
| BRC012_grd384b@24.asc | 20.35 | 0.22   | chb     | 1121  | -145  | grd8b      | BRC-01-2 | 11    | NaN    |
| BRC012_grd384b@25.asc | 19.74 | 0.26   | chb     | 1021  | -145  | grd8b      | BRC-01-2 | 12    | NaN    |



|                       |       |      |      |       |       |            |          |    |     |
|-----------------------|-------|------|------|-------|-------|------------|----------|----|-----|
| BRC012_grd384b@26.asc | 19.90 | 0.21 | chb  | 1021  | 50    | grd8b      | BRC-01-2 | 13 | NaN |
| BRC012_grd384b@27.asc | 17.66 | 0.22 | chb  | 1121  | 50    | grd8b      | BRC-01-2 | 14 | NaN |
| BRC012_grd384b@28.asc | 20.78 | 0.23 | chb  | 1121  | 245   | grd8b      | BRC-01-2 | 15 | NaN |
| BRC012_grd384b@32.asc | 20.49 | 0.15 | chb  | 1021  | 245   | grd8b      | BRC-01-2 | 16 | NaN |
| BRC012_grd384b@33.asc | 20.63 | 0.18 | chb  | 1021  | 440   | grd8b      | BRC-01-2 | 17 | NaN |
| BRC012_grd384b@34.asc | 20.21 | 0.17 | chb  | 1121  | 440   | grd8b      | BRC-01-2 | 18 | NaN |
| BRC012_grd384b@35.asc | 20.78 | 0.20 | chb  | 1121  | 630   | grd8b      | BRC-01-2 | 19 | NaN |
| BRC012_grd384b@36.asc | 20.36 | 0.16 | chb  | 1021  | 630   | grd8b      | BRC-01-2 | 20 | NaN |
| BRC012_grd384b@37.asc | 20.62 | 0.17 | chb  | 1021  | 823   | grd8b      | BRC-01-2 | 21 | NaN |
| BRC012_grd384b@38.asc | 20.17 | 0.21 | chb  | 1121  | 823   | grd8b      | BRC-01-2 | 22 | NaN |
| BRC012_grd384b@39.asc | 20.28 | 0.20 | chb  | 1121  | 1016  | grd8b      | BRC-01-2 | 23 | NaN |
| BRC012_grd384b@40.asc | 19.94 | 0.18 | chb  | 1021  | 1016  | grd8b      | BRC-01-2 | 24 | NaN |
| BRC012_grd384b@41.asc | 20.18 | 0.18 | chb  | 1021  | 1209  | grd8b      | BRC-01-2 | 25 | NaN |
| BRC012_grd384b@42.asc | 20.71 | 0.19 | chb  | 1121  | 1209  | grd8b      | BRC-01-2 | 26 | NaN |
| BRC012_grd384b@43.asc | 20.34 | 0.18 | chb  | 1121  | 1402  | grd8b      | BRC-01-2 | 27 | NaN |
| BRC012_grd384b@44.asc | 20.31 | 0.17 | chb  | 1021  | 1402  | grd8b      | BRC-01-2 | 28 | NaN |
| BRC012_grd384b@45.asc | 19.73 | 0.18 | cav  | 1021  | 1596  | grd8b      | BRC-01-2 | 29 | NaN |
| BRC012_grd384b@46.asc | 19.76 | 0.17 | cav  | 1121  | 1596  | grd8b      | BRC-01-2 | 30 | NaN |
| BRC012_grd384b@50.asc | 20.87 | 0.15 | chb  | -8062 | -2993 | grd4b      | BRC-01-2 | 1  | NaN |
| BRC012_grd384b@51.asc | 20.92 | 0.15 | chb  | -7962 | -2993 | grd4b      | BRC-01-2 | 2  | NaN |
| BRC012_grd384b@52.asc | 21.15 | 0.14 | chb  | -7962 | -2586 | grd4b      | BRC-01-2 | 3  | NaN |
| BRC012_grd384b@53.asc | 20.76 | 0.15 | chb  | -8062 | -2586 | grd4b      | BRC-01-2 | 4  | NaN |
| BRC012_grd384b@54.asc | 19.98 | 0.16 | carb | -8062 | -2179 | grd4b      | BRC-01-2 | 5  | NaN |
| BRC012_grd384b@55.asc | 13.10 | 0.58 |      | -7962 | -2179 | grd4b      | BRC-01-2 | 6  | NaN |
| BRC012_grd384b@56.asc | 20.05 | 0.18 | carb | -7962 | -1772 | grd4b      | BRC-01-2 | 7  | NaN |
| BRC012_grd384b@57.asc | 20.44 | 0.17 | carb | -8062 | -1772 | grd4b      | BRC-01-2 | 8  | NaN |
| BRC012_grd384b@58.asc | 18.62 | 0.17 | carb | -8062 | -1365 | grd4b      | BRC-01-2 | 9  | NaN |
| BRC012_grd384b@59.asc | 20.16 | 0.17 | carb | -7962 | -1365 | grd4b      | BRC-01-2 | 10 | NaN |
| BRC012_grd384b@60.asc | 20.28 | 0.15 | chb  | -7962 | -958  | grd4b      | BRC-01-2 | 11 | NaN |
| BRC012_grd384b@61.asc | 20.69 | 0.19 | chb  | -8062 | -958  | grd4b      | BRC-01-2 | 12 | NaN |
| BRC012_grd384b@62.asc | 20.88 | 0.16 | cav  | -8062 | -550  | grd4b      | BRC-01-2 | 13 | NaN |
| BRC012_grd384b@63.asc | 21.03 | 0.15 | cav  | -7962 | -550  | grd4b      | BRC-01-2 | 14 | NaN |
| BRC012_cav2@1.asc     | 21.43 | 0.22 | cav  | 299   | NaN   | grdcement2 | BRC-01-2 | 1  | NaN |
| BRC012_cav2@2.asc     | 21.22 | 0.21 | cav  | 595   | 4407  | grdcement2 | BRC-01-2 | 2  | NaN |
| BRC012_cav2@3.asc     | 20.82 | 0.23 | cav  | 1181  | NaN   | grdcement2 | BRC-01-2 | 3  | NaN |
| BRC012_cav2@4.asc     | 21.06 | 0.20 | cav  | 1772  | NaN   | grdcement2 | BRC-01-2 | 4  | NaN |
| BRC012_cav2@5.asc     | 20.60 | 0.16 | cav  | 2162  | NaN   | grdcement2 | BRC-01-2 | 5  | NaN |
| BRC012_cav2@6.asc     | 20.01 | 0.18 | cav  | 2300  | NaN   | grdcement2 | BRC-01-2 | 6  | NaN |
| BRC012_cav2@7.asc     | 20.12 | 0.26 | chb  | 1069  | NaN   | grdcement2 | BRC-01-2 | 7  | NaN |
| BRC012_cav2@8.asc     | 20.87 | 0.23 | chb  | 1197  | 153   | grdcement2 | BRC-01-2 | 8  | NaN |
| BRC012_cav2@9.asc     | 20.64 | 0.18 | chb  | 1071  | NaN   | grdcement2 | BRC-01-2 | 9  | NaN |
| BRC012_cav2@10.asc    | 19.88 | 0.19 | chb  | 896   | 337   | grdcement2 | BRC-01-2 | 10 | NaN |
| BRC012_grd9@1.asc     | 20.49 | 0.15 | chb  | -6020 | -1326 | grd9       | BRC-01-2 | 1  | NaN |
| BRC012_grd9@2.asc     | 21.21 | 0.24 | chb  | -5920 | -1326 | grd9       | BRC-01-2 | 2  | NaN |
| BRC012_grd9@3.asc     | 19.49 | 0.26 | chb  | -5820 | -1326 | grd9       | BRC-01-2 | 3  | NaN |
| BRC012_grd9@4.asc     | 20.96 | 0.16 | chb  | -5720 | -1326 | grd9       | BRC-01-2 | 4  | NaN |
| BRC012_grd9@5.asc     | 19.90 | 0.25 | chb  | -5620 | -1326 | grd9       | BRC-01-2 | 5  | NaN |

|                    |       |      |      |       |       |      |          |    |       |
|--------------------|-------|------|------|-------|-------|------|----------|----|-------|
| BRC012_grd9@6.asc  | 20.48 | 0.18 | chb  | -5520 | -1326 | grd9 | BRC-01-2 | 6  | NaN   |
| BRC012_grd9@7.asc  | 20.80 | 0.16 | chb  | -5420 | -1326 | grd9 | BRC-01-2 | 7  | NaN   |
| BRC012_grd9@8.asc  | 20.26 | 0.15 | chb  | -5320 | -1326 | grd9 | BRC-01-2 | 8  | NaN   |
| BRC012_grd9@9.asc  | 20.92 | 0.24 | chb  | -5320 | -1226 | grd9 | BRC-01-2 | 9  | NaN   |
| BRC012_grd9@10.asc | 20.01 | 0.16 | chb  | -5420 | -1226 | grd9 | BRC-01-2 | 10 | NaN   |
| BRC012_grd9@11.asc | 19.75 | 0.19 | chb  | -5520 | -1226 | grd9 | BRC-01-2 | 11 | NaN   |
| BRC012_grd9@12.asc | 20.10 | 0.23 | chb  | -5620 | -1226 | grd9 | BRC-01-2 | 12 | NaN   |
| BRC012_grd9@13.asc | 19.62 | 0.33 | cav  | -5720 | -1226 | grd9 | BRC-01-2 | 13 | NaN   |
| BRC012_grd9@14.asc | 19.63 | 0.27 | cav  | -5820 | -1226 | grd9 | BRC-01-2 | 14 | NaN   |
| BRC012_grd9@15.asc | 20.03 | 0.24 | cav  | -5920 | -1226 | grd9 | BRC-01-2 | 15 | NaN   |
| BRC012_grd9@16.asc | 19.16 | 0.18 | cav  | -6020 | -1226 | grd9 | BRC-01-2 | 16 | NaN   |
| BH037_grd1@1.asc   | 17.57 | 0.16 | chb  | -1823 | -4211 | grd1 | BH-03-7  | 1  | NaN   |
| BH037_grd1@2.asc   | 17.36 | 0.16 | chb  | -1723 | -4211 | grd1 | BH-03-7  | 2  | NaN   |
| BH037_grd1@3.asc   | 17.44 | 0.17 | carb | -1723 | -3874 | grd1 | BH-03-7  | 3  | NaN   |
| BH037_grd1@4.asc   | 17.21 | 0.13 | vein | -1823 | -3874 | grd1 | BH-03-7  | 4  | NaN   |
| BH037_grd1@5.asc   | 16.81 | 0.17 | carb | -1823 | -3537 | grd1 | BH-03-7  | 5  | NaN   |
| BH037_grd1@6.asc   | 17.61 | 0.17 | carb | -1723 | -3537 | grd1 | BH-03-7  | 6  | NaN   |
| BH037_grd1@7.asc   | 16.85 | 0.16 | carb | -1723 | -3200 | grd1 | BH-03-7  | 7  | NaN   |
| BH037_grd1@8.asc   | 17.01 | 0.16 | carb | -1823 | -3200 | grd1 | BH-03-7  | 8  | NaN   |
| BH037_grd1@9.asc   | 17.84 | 0.17 | chg  | -1823 | -2863 | grd1 | BH-03-7  | 9  | NaN   |
| BH037_grd1@10.asc  | 17.38 | 0.17 | chg  | -1723 | -2863 | grd1 | BH-03-7  | 10 | NaN   |
| BH037_grd1@11.asc  | 16.92 | 0.17 | carb | -1723 | -2526 | grd1 | BH-03-7  | 11 | NaN   |
| BH037_grd1@12.asc  | 16.52 | 0.15 | carb | -1823 | -2526 | grd1 | BH-03-7  | 12 | NaN   |
| BH037_grd1@13.asc  | 17.49 | 0.15 | chb  | -1823 | -2187 | grd1 | BH-03-7  | 13 | NaN   |
| BH037_grd1@14.asc  | 17.10 | 0.13 | carb | -1723 | -2187 | grd1 | BH-03-7  | 14 | NaN   |
| BH037_grd1@15.asc  | 17.78 | 0.16 | chb  | -1723 | -1850 | grd1 | BH-03-7  | 15 | NaN   |
| BH037_grd1@16.asc  | 17.62 | 0.13 | chb  | -1823 | -1850 | grd1 | BH-03-7  | 16 | NaN   |
| BH037_grd23@1.asc  | 17.79 | 0.27 | chb  | 510   | 6580  | grd2 | BH-03-7  | 1  | Fig08 |
| BH037_grd23@2.asc  | 18.16 | 0.16 | chb  | 695   | 6580  | grd2 | BH-03-7  | 2  | Fig08 |
| BH037_grd23@3.asc  | 18.26 | 0.15 | chb  | 880   | 6580  | grd2 | BH-03-7  | 3  | Fig08 |
| BH037_grd23@4.asc  | 18.30 | 0.19 | chb  | 1067  | 6580  | grd2 | BH-03-7  | 4  | Fig08 |
| BH037_grd23@5.asc  | 17.79 | 0.17 | chb  | 1252  | 6580  | grd2 | BH-03-7  | 5  | Fig08 |
| BH037_grd23@6.asc  | 17.10 | 0.18 | carb | 1439  | 6580  | grd2 | BH-03-7  | 6  | Fig08 |
| BH037_grd23@7.asc  | 16.44 | 0.27 | carb | 1624  | 6580  | grd2 | BH-03-7  | 7  | Fig08 |
| BH037_grd23@8.asc  | 17.76 | 0.17 | vein | 1810  | 6580  | grd2 | BH-03-7  | 8  | Fig08 |
| BH037_grd23@9.asc  | 16.39 | 0.17 | carb | 1810  | 6680  | grd2 | BH-03-7  | 9  | Fig08 |
| BH037_grd23@10.asc | 16.40 | 0.14 | carb | 1624  | 6680  | grd2 | BH-03-7  | 10 | Fig08 |
| BH037_grd23@11.asc | 17.38 | 0.18 | carb | 1438  | 6680  | grd2 | BH-03-7  | 11 | Fig08 |
| BH037_grd23@12.asc | 17.08 | 0.14 | carb | 1252  | 6680  | grd2 | BH-03-7  | 12 | Fig08 |
| BH037_grd23@13.asc | 17.22 | 0.17 | carb | 1067  | 6680  | grd2 | BH-03-7  | 13 | Fig08 |
| BH037_grd23@14.asc | 17.98 | 0.16 | chb  | 881   | 6680  | grd2 | BH-03-7  | 14 | Fig08 |
| BH037_grd23@15.asc | 18.16 | 0.19 | chb  | 695   | 6680  | grd2 | BH-03-7  | 15 | Fig08 |
| BH037_grd23@16.asc | 18.23 | 0.16 | chb  | 511   | 6680  | grd2 | BH-03-7  | 16 | Fig08 |
| BH037_grd23@20.asc | 18.03 | 0.19 | chb  | 819   | -4863 | grd3 | BH-03-7  | 1  | NaN   |
| BH037_grd23@21.asc | 17.08 | 0.19 | chb  | 919   | -4863 | grd3 | BH-03-7  | 2  | NaN   |
| BH037_grd23@22.asc | 18.04 | 0.23 | chb  | 919   | -4518 | grd3 | BH-03-7  | 3  | NaN   |
| BH037_grd23@23.asc | 17.70 | 0.17 | chb  | 819   | -4519 | grd3 | BH-03-7  | 4  | NaN   |

|                    |       |      |      |      |       |      |           |    |       |
|--------------------|-------|------|------|------|-------|------|-----------|----|-------|
| BH037_grd23@24.asc | 16.99 | 0.21 | carb | 819  | -4173 | grd3 | BH-03-7   | 5  | NaN   |
| BH037_grd23@25.asc | 17.20 | 0.25 | carb | 919  | -4173 | grd3 | BH-03-7   | 6  | NaN   |
| BH037_grd23@26.asc | 17.41 | 0.20 | carb | 919  | -3827 | grd3 | BH-03-7   | 7  | NaN   |
| BH037_grd23@27.asc | 16.98 | 0.18 | carb | 819  | -3827 | grd3 | BH-03-7   | 8  | NaN   |
| BH037_grd23@28.asc | 17.08 | 0.18 | carb | 819  | -3481 | grd3 | BH-03-7   | 9  | NaN   |
| BH037_grd23@29.asc | 17.18 | 0.18 | carb | 919  | -3481 | grd3 | BH-03-7   | 10 | NaN   |
| BH037_grd23@30.asc | 16.79 | 0.21 | carb | 919  | -3135 | grd3 | BH-03-7   | 11 | NaN   |
| BH037_grd23@31.asc | 16.59 | 0.19 | carb | 819  | -3135 | grd3 | BH-03-7   | 12 | NaN   |
| BH037_grd23@32.asc | 17.67 | 0.17 | chg  | 819  | -2789 | grd3 | BH-03-7   | 13 | NaN   |
| BH037_grd23@33.asc | 17.77 | 0.21 | chg  | 919  | -2789 | grd3 | BH-03-7   | 14 | NaN   |
| BH037_grd23@34.asc | 17.53 | 0.19 | chb  | 919  | -2443 | grd3 | BH-03-7   | 15 | NaN   |
| BH037_grd23@35.asc | 17.28 | 0.20 | chb  | 819  | -2443 | grd3 | BH-03-7   | 16 | NaN   |
| BH037_grd23@36.asc | 17.03 | 0.16 | chb  | 819  | -2099 | grd3 | BH-03-7   | 17 | NaN   |
| BH037_grd23@37.asc | 17.62 | 0.22 | chb  | 919  | -2099 | grd3 | BH-03-7   | 18 | NaN   |
| brc3grd1@1.asc     | 18.44 | 0.20 | cav  | 2038 | 1077  | grd1 | BRC-01-3A | 1  | Fig05 |
| brc3grd1@2.asc     | 18.02 | 0.19 | cav  | 2238 | 1077  | grd1 | BRC-01-3A | 2  | Fig05 |
| brc3grd1@3.asc     | 19.95 | 0.49 | cht  | 2238 | 1285  | grd1 | BRC-01-3A | 3  | Fig05 |
| brc3grd1@4.asc     | 20.02 | 0.23 | cht  | 2038 | 1285  | grd1 | BRC-01-3A | 4  | Fig05 |
| brc3grd1@5.asc     | 19.61 | 0.36 | cht  | 2038 | 1493  | grd1 | BRC-01-3A | 5  | Fig05 |
| brc3grd1@6.asc     | 18.11 | 0.75 | cht  | 2238 | 1493  | grd1 | BRC-01-3A | 6  | Fig05 |
| brc3grd1@7.asc     | 20.05 | 0.56 | cht  | 2238 | 1702  | grd1 | BRC-01-3A | 7  | Fig05 |
| brc3grd1@8.asc     | 18.41 | 0.41 | cht  | 2038 | 1702  | grd1 | BRC-01-3A | 8  | Fig05 |
| brc3grd1@9.asc     | 20.48 | 0.31 | cht  | 2038 | 1910  | grd1 | BRC-01-3A | 9  | Fig05 |
| brc3grd1@10.asc    | 20.65 | 0.26 | cht  | 2238 | 1910  | grd1 | BRC-01-3A | 10 | Fig05 |
| brc3grd1@11.asc    | 20.33 | 0.23 | cht  | 2238 | 2118  | grd1 | BRC-01-3A | 11 | Fig05 |
| brc3grd1@12.asc    | 20.06 | 0.24 | cht  | 2038 | 2118  | grd1 | BRC-01-3A | 12 | Fig05 |
| brc3grd2@1.asc     | 19.29 | 0.23 | cav  | 2067 | -2138 | grd2 | BRC-01-3A | 1  | Fig05 |
| brc3grd2@2.asc     | 19.02 | 0.26 | cav  | 2267 | -2138 | grd2 | BRC-01-3A | 2  | Fig05 |
| brc3grd2@3.asc     | 19.62 | 0.23 | cht  | 2267 | -1938 | grd2 | BRC-01-3A | 3  | Fig05 |
| brc3grd2@4.asc     | 20.09 | 0.22 | cht  | 2067 | -1938 | grd2 | BRC-01-3A | 4  | Fig05 |
| brc3grd2@5.asc     | 20.35 | 0.28 | cht  | 2067 | -1738 | grd2 | BRC-01-3A | 5  | Fig05 |
| brc3grd2@6.asc     | 19.99 | 0.26 | cht  | 2267 | -1738 | grd2 | BRC-01-3A | 6  | Fig05 |
| brc3grd2@7.asc     | 20.94 | 0.36 | cht  | 2267 | -1538 | grd2 | BRC-01-3A | 7  | Fig05 |
| brc3grd2@8.asc     | 20.27 | 0.27 | cht  | 2067 | -1538 | grd2 | BRC-01-3A | 8  | Fig05 |
| brc3grd2@9.asc     | 20.31 | 0.24 | cht  | 2067 | -1358 | grd2 | BRC-01-3A | 9  | Fig05 |
| brc3grd2@10.asc    | 21.17 | 0.52 | cht  | 2267 | -1358 | grd2 | BRC-01-3A | 10 | Fig05 |
| brc3grd2@11.asc    | 19.52 | 0.67 | cht  | 2267 | -1138 | grd2 | BRC-01-3A | 11 | Fig05 |
| brc3grd2@12.asc    | 20.20 | 0.26 | cht  | 2067 | -1138 | grd2 | BRC-01-3A | 12 | Fig05 |
| brc3grd3@1.asc     | 18.88 | 0.24 | cav  | 2092 | -903  | grd3 | BRC-01-3A | 1  | Fig05 |
| brc3grd3@2.asc     | 19.21 | 0.20 | cav  | 2292 | -903  | grd3 | BRC-01-3A | 2  | Fig05 |
| brc3grd3@3.asc     | 19.73 | 0.22 | cav  | 2286 | -709  | grd3 | BRC-01-3A | 3  | Fig05 |
| brc3grd3@4.asc     | 20.39 | 0.23 | cav  | 2086 | -709  | grd3 | BRC-01-3A | 4  | Fig05 |
| brc3grd3@5.asc     | 20.68 | 0.25 | cav  | 2096 | -515  | grd3 | BRC-01-3A | 5  | Fig05 |
| brc3grd3@6.asc     | 21.33 | 1.19 | cav  | 2296 | -515  | grd3 | BRC-01-3A | 6  | Fig05 |
| brc3grd3@7.asc     | 19.44 | 0.25 | cav  | 2296 | -322  | grd3 | BRC-01-3A | 7  | Fig05 |
| brc3grd3@8.asc     | 19.92 | 0.20 | cav  | 2042 | -322  | grd3 | BRC-01-3A | 8  | Fig05 |
| brc3grd3@9.asc     | 19.97 | 0.26 | cav  | 2042 | -122  | grd3 | BRC-01-3A | 9  | Fig05 |

|                 |       |           |       |       |        |            |          |
|-----------------|-------|-----------|-------|-------|--------|------------|----------|
| brc3grd3@10.asc | 19.48 | 0.22 cav  | 2275  | -119  | grd3   | BRC-01-3A  | 10 Fig05 |
| brc3grd3@11.asc | 19.28 | 0.21 cav  | 2229  | 90    | grd3   | BRC-01-3A  | 11 Fig05 |
| brc3grd3@12.asc | 19.43 | 0.21 cav  | 1982  | 75    | grd3   | BRC-01-3A  | 12 Fig05 |
| brc3grd3@13.asc | 20.00 | 0.22 cav  | 2005  | 333   | grd3   | BRC-01-3A  | 13 Fig05 |
| brc3grd3@14.asc | 19.76 | 0.18 cav  | 2313  | 333   | grd3   | BRC-01-3A  | 14 Fig05 |
| brc3grd4@1.asc  | 19.19 | 0.16 cav  | 2027  | 482   | grd4   | BRC-01-3A  | 1 Fig05  |
| brc3grd4@2.asc  | 20.09 | 0.18 cav  | 2227  | 482   | grd4   | BRC-01-3A  | 2 Fig05  |
| brc3grd4@3.asc  | 19.73 | 0.20 cav  | 2255  | 682   | grd4   | BRC-01-3A  | 3 Fig05  |
| brc3grd4@4.asc  | 20.52 | 0.17 cav  | 2070  | 682   | grd4   | BRC-01-3A  | 4 Fig05  |
| brc3grd4@5.asc  | 20.13 | 0.25 cav  | 2070  | 882   | grd4   | BRC-01-3A  | 5 Fig05  |
| brc3grd4@6.asc  | 20.03 | 0.21 cav  | 2329  | 882   | grd4   | BRC-01-3A  | 6 Fig05  |
| brc3grd5@1.asc  | 21.01 | 0.19 cav  | -3623 | -325  | grd5   | BRC-01-3A  | 1 NaN    |
| brc3grd5@2.asc  | 20.97 | 0.19 cav  | -3423 | -325  | grd5   | BRC-01-3A  | 2 NaN    |
| brc3grd5@3.asc  | 21.16 | 0.16 cav  | -3438 | -125  | grd5   | BRC-01-3A  | 3 NaN    |
| brc3grd5@4.asc  | 20.28 | 0.19 cav  | -3674 | -120  | grd5   | BRC-01-3A  | 4 NaN    |
| brc3grd5@5.asc  | 20.93 | 0.20 cav  | -3604 | 75    | grd5   | BRC-01-3A  | 5 NaN    |
| brc3grd5@6.asc  | 21.50 | 0.19 cav  | -3404 | 75    | grd5   | BRC-01-3A  | 6 NaN    |
| brc3grd6@1.asc  | 19.85 | 0.20 cav  | -3672 | 304   | grd6   | BRC-01-3A  | 1 NaN    |
| brc3grd6@2.asc  | 20.37 | 0.22 cav  | -3472 | 304   | grd6   | BRC-01-3A  | 2 NaN    |
| brc3grd6@3.asc  | 21.70 | 0.22 cav  | -3522 | 504   | grd6   | BRC-01-3A  | 3 NaN    |
| brc3grd6@4.asc  | 19.93 | 0.19 cav  | -3748 | 504   | grd6   | BRC-01-3A  | 4 NaN    |
| brc3grd6@5.asc  | 20.58 | 0.26 cav  | -3748 | 704   | grd6   | BRC-01-3A  | 5 NaN    |
| brc3grd6@6.asc  | 20.11 | 0.25 cav  | -3500 | 704   | grd6   | BRC-01-3A  | 6 NaN    |
| brc3grd6@7.asc  | 19.64 | 0.16 cav  | -3568 | 904   | grd6   | BRC-01-3A  | 7 NaN    |
| brc3grd6@8.asc  | 21.23 | 0.23 cav  | -3768 | 904   | grd6   | BRC-01-3A  | 8 NaN    |
| brc3grd6@9.asc  | 20.10 | 0.21 cav  | -3768 | 1101  | grd6   | BRC-01-3A  | 9 NaN    |
| brc3grd6@10.asc | 19.98 | 0.24 cav  | -3514 | 1101  | grd6   | BRC-01-3A  | 10 NaN   |
| 15grd1b@1.asc   | 20.22 | 0.25 vein | 1501  | 321   | grd1b  | SAF 521-15 | 1 Fig04  |
| 15grd1b@2.asc   | 19.41 | 0.26 chg  | 1601  | 321   | grd1b  | SAF 521-15 | 2 Fig04  |
| 15grd1b@3.asc   | 20.53 | 0.26 chg  | 1701  | 321   | grd1b  | SAF 521-15 | 3 Fig04  |
| 15grd1b@4.asc   | 20.46 | 0.26 chg  | 1801  | 321   | grd1b  | SAF 521-15 | 4 Fig04  |
| 15grd1b@5.asc   | 20.41 | 0.23 chg  | 1801  | 421   | grd1b  | SAF 521-15 | 5 Fig04  |
| 15grd1b@6.asc   | 20.15 | 0.25 chg  | 1701  | 421   | grd1b  | SAF 521-15 | 6 Fig04  |
| 15grd1b@7.asc   | 20.31 | 0.25 chg  | 1601  | 421   | grd1b  | SAF 521-15 | 7 Fig04  |
| 15grd1b@8.asc   | 20.58 | 0.25 vein | 1501  | 421   | grd1b  | SAF 521-15 | 8 Fig04  |
| 15grd1b@9.asc   | 20.98 | 0.26 vein | 1501  | 521   | grd1b  | SAF 521-15 | 9 Fig04  |
| 15grd1b@10.asc  | 21.03 | 0.26 chg  | 1601  | 521   | grd1b  | SAF 521-15 | 10 Fig04 |
| 15grd1b@11.asc  | 20.92 | 0.28 chg  | 1701  | 521   | grd1b  | SAF 521-15 | 11 Fig04 |
| 15grd1b@12.asc  | 21.69 | 0.27 chg  | 1801  | 521   | grd1b  | SAF 521-15 | 12 Fig04 |
| 15grd1b@13.asc  | 21.16 | 0.25 chg  | 1801  | 621   | grd1b  | SAF 521-15 | 13 Fig04 |
| 15grd1b@14.asc  | 20.49 | 0.22 chg  | 1701  | 621   | grd1b  | SAF 521-15 | 14 Fig04 |
| 15grd1b@15.asc  | 20.46 | 0.25 chg  | 1601  | 621   | grd1b  | SAF 521-15 | 15 Fig04 |
| 15grd1b@16.asc  | 21.81 | 0.25 vein | 1501  | 621   | grd1b  | SAF 521-15 | 16 Fig04 |
| 15grd11b@4.asc  | 25.85 | 0.52      | -2605 | -5468 | grd11b | SAF 521-15 | 1 NaN    |
| 15grd11b@5.asc  | 20.97 | 0.46      | -2505 | -5468 | grd11b | SAF 521-15 | 2 NaN    |
| 15grd11b@6.asc  | 23.02 | 0.55      | -2505 | -5368 | grd11b | SAF 521-15 | 3 NaN    |
| 15grd11b@7.asc  | 22.70 | 0.45      | -2605 | -5368 | grd11b | SAF 521-15 | 4 NaN    |

|                 |       |           |       |       |        |            |    |     |
|-----------------|-------|-----------|-------|-------|--------|------------|----|-----|
| 15grd11b@8.asc  | 23.01 | 0.38      | -2605 | -5268 | grd11b | SAF 521-15 | 5  | NaN |
| 15grd11b@9.asc  | 22.59 | 0.36      | -2505 | -5268 | grd11b | SAF 521-15 | 6  | NaN |
| 15grd11b@10.asc | 22.86 | 0.36      | -2505 | -5168 | grd11b | SAF 521-15 | 7  | NaN |
| 15grd11b@11.asc | 25.27 | 0.32      | -2605 | -5168 | grd11b | SAF 521-15 | 8  | NaN |
| 15grd11b@12.asc | 24.87 | 0.34      | -2605 | -5068 | grd11b | SAF 521-15 | 9  | NaN |
| 15grd11b@13.asc | 23.66 | 0.30      | -2505 | -5068 | grd11b | SAF 521-15 | 10 | NaN |
| 15grd11b@14.asc | 22.51 | 0.33      | -2505 | -4968 | grd11b | SAF 521-15 | 11 | NaN |
| 15grd11b@15.asc | 21.89 | 0.29      | -2605 | -4968 | grd11b | SAF 521-15 | 12 | NaN |
| 15grd11b@16.asc | 21.61 | 0.25      | -2605 | -4868 | grd11b | SAF 521-15 | 13 | NaN |
| 15grd11b@17.asc | 20.56 | 0.27      | -2505 | -4868 | grd11b | SAF 521-15 | 14 | NaN |
| 15grd11b@18.asc | 21.44 | 0.24      | -2505 | -4768 | grd11b | SAF 521-15 | 15 | NaN |
| 15grd11b@19.asc | 22.06 | 0.24      | -2605 | -4768 | grd11b | SAF 521-15 | 16 | NaN |
| 15grd3b@1.asc   | 20.39 | 0.19 chg  | 3038  | 415   | grd3b  | SAF 521-15 | 1  | NaN |
| 15grd3b@2.asc   | 19.46 | 0.17 chg  | 3138  | 415   | grd3b  | SAF 521-15 | 2  | NaN |
| 15grd3b@3.asc   | 19.81 | 0.21 chg  | 3238  | 415   | grd3b  | SAF 521-15 | 3  | NaN |
| 15grd3b@4.asc   | 20.79 | 0.23 chg  | 3338  | 415   | grd3b  | SAF 521-15 | 4  | NaN |
| 15grd3b@5.asc   | 21.25 | 0.17 chg  | 3338  | 515   | grd3b  | SAF 521-15 | 5  | NaN |
| 15grd3b@7.asc   | 20.17 | 0.19 chg  | 3138  | 515   | grd3b  | SAF 521-15 | 6  | NaN |
| 15grd3b@8.asc   | 20.69 | 0.24 chg  | 3038  | 515   | grd3b  | SAF 521-15 | 7  | NaN |
| 15grd3b@9.asc   | 20.56 | 0.25 chg  | 3038  | 615   | grd3b  | SAF 521-15 | 8  | NaN |
| 15grd3b@10.asc  | 20.13 | 0.19 chg  | 3138  | 615   | grd3b  | SAF 521-15 | 9  | NaN |
| 15grd3b@11.asc  | 20.98 | 0.17 chg  | 3238  | 615   | grd3b  | SAF 521-15 | 10 | NaN |
| 15grd3b@12.asc  | 20.46 | 0.22 chg  | 3338  | 615   | grd3b  | SAF 521-15 | 11 | NaN |
| 15grd3b@13.asc  | 21.09 | 0.18 chg  | 3338  | 715   | grd3b  | SAF 521-15 | 12 | NaN |
| 15grd3b@14.asc  | 21.46 | 0.19 chg  | 3238  | 715   | grd3b  | SAF 521-15 | 13 | NaN |
| 15grd3b@15.asc  | 21.36 | 0.20 chg  | 3138  | 715   | grd3b  | SAF 521-15 | 14 | NaN |
| 15grd3b@16.asc  | 21.46 | 0.20 chg  | 3038  | 715   | grd3b  | SAF 521-15 | 15 | NaN |
| 16grd2b@1.asc   | 20.92 | 0.27 chg  | -1014 | 834   | grd2b  | SAF 521-16 | 1  | NaN |
| 16grd2b@2.asc   | 21.32 | 0.27 chg  | -914  | 834   | grd2b  | SAF 521-16 | 2  | NaN |
| 16grd2b@3.asc   | 21.32 | 0.24 chg  | -814  | 834   | grd2b  | SAF 521-16 | 3  | NaN |
| 16grd2b@4.asc   | 21.61 | 0.21 carb | -714  | 834   | grd2b  | SAF 521-16 | 4  | NaN |
| 16grd2b@5.asc   | 21.56 | 0.20 chg  | -714  | 934   | grd2b  | SAF 521-16 | 5  | NaN |
| 16grd2b@6.asc   | 22.41 | 0.20 chg  | -814  | 934   | grd2b  | SAF 521-16 | 6  | NaN |
| 16grd2b@7.asc   | 22.34 | 0.22 chg  | -914  | 934   | grd2b  | SAF 521-16 | 7  | NaN |
| 16grd2b@8.asc   | 22.36 | 0.26 chg  | -1014 | 934   | grd2b  | SAF 521-16 | 8  | NaN |
| 16grd2b@9.asc   | 21.62 | 0.23 chg  | -1014 | 1034  | grd2b  | SAF 521-16 | 9  | NaN |
| 16grd2b@10.asc  | 22.46 | 0.27 chg  | -914  | 1034  | grd2b  | SAF 521-16 | 10 | NaN |
| 16grd2b@11.asc  | 22.03 | 0.26 chg  | -814  | 1034  | grd2b  | SAF 521-16 | 11 | NaN |
| 16grd2b@12.asc  | 22.26 | 0.22 chg  | -714  | 1034  | grd2b  | SAF 521-16 | 12 | NaN |
| 16grd2b@13.asc  | 21.90 | 0.29 chg  | -714  | 1134  | grd2b  | SAF 521-16 | 13 | NaN |
| 16grd2b@14.asc  | 21.50 | 0.23 chg  | -814  | 1134  | grd2b  | SAF 521-16 | 14 | NaN |
| 16grd2b@15.asc  | 21.92 | 0.26 chg  | -914  | 1134  | grd2b  | SAF 521-16 | 15 | NaN |
| 16grd2b@16.asc  | 21.09 | 0.33 carb | -1014 | 1134  | grd2b  | SAF 521-16 | 16 | NaN |
| 16grd5b@1.asc   | 20.89 | 0.33 chg  | -1780 | 1193  | grd5b  | SAF 521-16 | 1  | NaN |
| 16grd5b@2.asc   | 21.67 | 0.27 cav  | -1680 | 1193  | grd5b  | SAF 521-16 | 2  | NaN |
| 16grd5b@3.asc   | 22.57 | 0.23 carb | -1580 | 1193  | grd5b  | SAF 521-16 | 3  | NaN |
| 16grd5b@4.asc   | 21.18 | 0.27 chg  | -1480 | 1193  | grd5b  | SAF 521-16 | 4  | NaN |

|                     |       |      |       |       |       |       |            |    |     |
|---------------------|-------|------|-------|-------|-------|-------|------------|----|-----|
| 16grd5b@5.asc       | 20.20 | 0.21 | carbg | -1480 | 1293  | grd5b | SAF 521-16 | 5  | NaN |
| 16grd5b@6.asc       | 23.15 | 0.22 | cav   | -1580 | 1293  | grd5b | SAF 521-16 | 6  | NaN |
| 16grd5b@7.asc       | 22.48 | 0.24 | cav   | -1680 | 1293  | grd5b | SAF 521-16 | 7  | NaN |
| 16grd5b@8.asc       | 22.19 | 0.29 | chg   | -1780 | 1293  | grd5b | SAF 521-16 | 8  | NaN |
| 16grd5b@9.asc       | 23.24 | 0.23 | carbg | -1780 | 1393  | grd5b | SAF 521-16 | 9  | NaN |
| 16grd5b@10.asc      | 22.16 | 0.27 | carbg | -1680 | 1393  | grd5b | SAF 521-16 | 10 | NaN |
| 16grd5b@11.asc      | 22.57 | 0.24 | cav   | -1580 | 1393  | grd5b | SAF 521-16 | 11 | NaN |
| 16grd5b@12.asc      | 22.26 | 0.22 | carbg | -1480 | 1393  | grd5b | SAF 521-16 | 12 | NaN |
| 16grd5b@13.asc      | 23.31 | 0.24 | carbg | -1480 | 1493  | grd5b | SAF 521-16 | 13 | NaN |
| 16grd5b@14.asc      | 23.39 | 0.29 | carbg | -1580 | 1493  | grd5b | SAF 521-16 | 14 | NaN |
| 16grd5b@15.asc      | 22.22 | 0.30 | carbg | -1680 | 1493  | grd5b | SAF 521-16 | 15 | NaN |
| 16grd5b@16.asc      | 22.44 | 0.27 | cav   | -1780 | 1493  | grd5b | SAF 521-16 | 16 | NaN |
| BH039_Grid2B@1.asc  | 18.81 | 0.20 | chb   | -2206 | -3890 | grd2b | BH-03-9    | 1  | NaN |
| BH039_Grid2B@2.asc  | 19.03 | 0.20 | chb   | -2206 | -3690 | grd2b | BH-03-9    | 2  | NaN |
| BH039_Grid2B@3.asc  | 19.08 | 0.20 | chb   | -2206 | -3490 | grd2b | BH-03-9    | 3  | NaN |
| BH039_Grid2B@4.asc  | 19.12 | 0.19 | cav   | -2206 | -3290 | grd2b | BH-03-9    | 4  | NaN |
| BH039_Grid2B@5.asc  | 17.78 | 0.17 | chb   | -2206 | -3090 | grd2b | BH-03-9    | 5  | NaN |
| BH039_Grid2B@6.asc  | 18.76 | 0.21 | chb   | -2206 | -2890 | grd2b | BH-03-9    | 6  | NaN |
| BH039_Grid2B@7.asc  | 18.08 | 0.15 | carb  | -2206 | -2690 | grd2b | BH-03-9    | 7  | NaN |
| BH039_Grid2B@8.asc  | 18.28 | 0.21 | carb  | -2206 | -2490 | grd2b | BH-03-9    | 8  | NaN |
| BH039_Grid2B@9.asc  | 19.16 | 0.17 | chb   | -2206 | -2290 | grd2b | BH-03-9    | 9  | NaN |
| BH039_Grid2B@10.asc | 17.55 | 0.17 | chb   | -2206 | -2090 | grd2b | BH-03-9    | 10 | NaN |
| BH039_grd3b@1.asc   | 20.59 | 0.19 | crk   | -3681 |       | grd3b | BH-03-9    | 1  | NaN |
| BH039_grd3b@2.asc   | 20.26 | 0.20 | crk   | -3508 |       | grd3b | BH-03-9    | 2  | NaN |
| BH039_grd3b@3.asc   | 19.75 | 0.20 | crk   | -3234 | 8156  | grd3b | BH-03-9    | 3  | NaN |
| BH039_grd3b@4.asc   | 20.03 | 0.21 | chb   | -3274 | 6758  | grd3b | BH-03-9    | 4  | NaN |
| BH039_grd3b@5.asc   | 20.09 | 0.20 | chb   | -3174 | 6758  | grd3b | BH-03-9    | 5  | NaN |
| BH039_grd3b@6.asc   | 19.77 | 0.20 | chb   | -3174 | 7058  | grd3b | BH-03-9    | 6  | NaN |
| BH039_grd3b@7.asc   | 19.04 | 0.16 | chb   | -3274 | 7058  | grd3b | BH-03-9    | 7  | NaN |
| BH039_grd3b@8.asc   | 20.21 | 0.20 | chb   | -3274 | 7358  | grd3b | BH-03-9    | 8  | NaN |
| BH039_grd3b@9.asc   | 20.24 | 0.13 | chb   | -3174 | 7358  | grd3b | BH-03-9    | 9  | NaN |
| BH039_grd3b@10.asc  | 19.78 | 0.16 | chb   | -3174 | 7658  | grd3b | BH-03-9    | 10 | NaN |
| BH039_grd3b@11.asc  | 20.21 | 0.18 | chb   | -3274 | 7658  | grd3b | BH-03-9    | 11 | NaN |
| BH039_grd3b@12.asc  | 19.83 | 0.19 | carb  | -3274 | 7958  | grd3b | BH-03-9    | 12 | NaN |
| BH039_grd3b@13.asc  | 19.99 | 0.17 | carb  | -3174 | 7958  | grd3b | BH-03-9    | 13 | NaN |
| BH039_grd5@5.asc    | 19.54 | 0.17 | carb  | -2374 | 8879  | grd5  | BH-03-9    | 1  | NaN |
| BH039_grd5@6.asc    | 19.21 | 0.17 | carb  | -2174 | 8879  | grd5  | BH-03-9    | 2  | NaN |
| BH039_grd5@7.asc    | 19.28 | 0.20 | carb  | -1974 | 8879  | grd5  | BH-03-9    | 3  | NaN |
| BH039_grd5@8.asc    | 19.71 | 0.17 | carb  | -1774 | 8879  | grd5  | BH-03-9    | 4  | NaN |
| BH039_grd5@9.asc    | 19.18 | 0.16 | carb  | -1774 | 9012  | grd5  | BH-03-9    | 5  | NaN |
| BH039_grd5@10.asc   | 19.29 | 0.17 | carb  | -1974 | 9012  | grd5  | BH-03-9    | 6  | NaN |
| BH039_grd5@11.asc   | 19.29 | 0.16 | carb  | -2174 | 9012  | grd5  | BH-03-9    | 7  | NaN |
| BH039_grd5@12.asc   | 19.27 | 0.18 | carb  | -2374 | 9012  | grd5  | BH-03-9    | 8  | NaN |
| BH039_grd5@13.asc   | 19.44 | 0.16 | carb  | -2374 | 9146  | grd5  | BH-03-9    | 9  | NaN |
| BH039_grd5@14.asc   | 19.63 | 0.13 | carb  | -2174 | 9146  | grd5  | BH-03-9    | 10 | NaN |
| BH039_grd5@15.asc   | 19.59 | 0.17 | carb  | -1974 | 9146  | grd5  | BH-03-9    | 11 | NaN |
| BH039_grd5@16.asc   | 18.84 | 0.17 | carb  | -1774 | 9146  | grd5  | BH-03-9    | 12 | NaN |

|                    |       |      |      |       |      |      |         |    |     |
|--------------------|-------|------|------|-------|------|------|---------|----|-----|
| BH039_grd67@4.asc  | 19.53 | 0.21 | chb  | -3273 | 6522 | grd6 | BH-03-9 | 1  | NaN |
| BH039_grd67@5.asc  | 19.54 | 0.21 | chb  | -3173 | 6522 | grd6 | BH-03-9 | 2  | NaN |
| BH039_grd67@6.asc  | 19.23 | 0.19 | chb  | -3173 | 6416 | grd6 | BH-03-9 | 3  | NaN |
| BH039_grd67@7.asc  | 18.60 | 0.20 | chb  | -3273 | 6416 | grd6 | BH-03-9 | 4  | NaN |
| BH039_grd67@8.asc  | 19.53 | 0.18 | chb  | -3273 | 6310 | grd6 | BH-03-9 | 5  | NaN |
| BH039_grd67@9.asc  | 19.30 | 0.13 | chb  | -3173 | 6310 | grd6 | BH-03-9 | 6  | NaN |
| BH039_grd67@10.asc | 19.57 | 0.19 | chb  | -3173 | 6201 | grd6 | BH-03-9 | 7  | NaN |
| BH039_grd67@11.asc | 19.05 | 0.17 | chb  | -3273 | 6201 | grd6 | BH-03-9 | 8  | NaN |
| BH039_grd67@12.asc | 19.29 | 0.18 | chb  | -3273 | 6092 | grd6 | BH-03-9 | 9  | NaN |
| BH039_grd67@13.asc | 19.97 | 0.20 | chb  | -3173 | 6092 | grd6 | BH-03-9 | 10 | NaN |
| BH039_grd67@14.asc | 19.04 | 0.18 | chb  | -3173 | 5989 | grd6 | BH-03-9 | 11 | NaN |
| BH039_grd67@15.asc | 18.95 | 0.22 | chb  | -3273 | 5988 | grd6 | BH-03-9 | 12 | NaN |
| BH039_grd67@16.asc | 19.96 | 0.32 | chb  | -3273 | 5882 | grd6 | BH-03-9 | 13 | NaN |
| BH039_grd67@17.asc | 18.57 | 0.21 | chb  | -3173 | 5881 | grd6 | BH-03-9 | 14 | NaN |
| BH039_grd67@18.asc | 19.69 | 0.17 | chb  | -3173 | 5775 | grd6 | BH-03-9 | 15 | NaN |
| BH039_grd67@22.asc | 19.01 | 0.19 | chb  | -3273 | 5775 | grd6 | BH-03-9 | 16 | NaN |
| BH039_grd67@23.asc | 18.31 | 0.19 | chb  | -3273 | 5668 | grd6 | BH-03-9 | 17 | NaN |
| BH039_grd67@24.asc | 19.26 | 0.21 | chb  | -3173 | 5668 | grd6 | BH-03-9 | 18 | NaN |
| BH039_grd67@25.asc | 19.05 | 0.15 | chb  | -3173 | 5561 | grd6 | BH-03-9 | 19 | NaN |
| BH039_grd67@26.asc | 18.20 | 0.19 | chb  | -3273 | 5561 | grd6 | BH-03-9 | 20 | NaN |
| BH039_grd67@27.asc | 19.38 | 0.17 | chb  | -3273 | 5454 | grd6 | BH-03-9 | 21 | NaN |
| BH039_grd67@28.asc | 19.66 | 0.22 | chb  | -3173 | 5454 | grd6 | BH-03-9 | 22 | NaN |
| BH039_grd67@29.asc | 19.55 | 0.25 | chb  | -3173 | 5349 | grd6 | BH-03-9 | 23 | NaN |
| BH039_grd67@30.asc | 18.54 | 0.17 | chb  | -3273 | 5349 | grd6 | BH-03-9 | 24 | NaN |
| BH039_grd67@31.asc | 18.52 | 0.23 | chb  | -3273 | 5242 | grd6 | BH-03-9 | 25 | NaN |
| BH039_grd67@32.asc | 19.36 | 0.21 | chb  | -3173 | 5242 | grd6 | BH-03-9 | 26 | NaN |
| BH039_grd67@33.asc | 19.06 | 0.18 | chb  | -3173 | 5135 | grd6 | BH-03-9 | 27 | NaN |
| BH039_grd67@34.asc | 19.18 | 0.26 | chb  | -3273 | 5135 | grd6 | BH-03-9 | 28 | NaN |
| BH039_grd67@35.asc | 18.96 | 0.18 | chb  | -3273 | 5028 | grd6 | BH-03-9 | 29 | NaN |
| BH039_grd67@36.asc | 19.24 | 0.19 | chb  | -3173 | 5028 | grd6 | BH-03-9 | 30 | NaN |
| BH039_grd67@40.asc | 19.49 | 0.23 | chb  | -2318 | 7150 | grd7 | BH-03-9 | 1  | NaN |
| BH039_grd67@41.asc | 19.20 | 0.26 | chb  | -2068 | 7150 | grd7 | BH-03-9 | 2  | NaN |
| BH039_grd67@42.asc | 18.59 | 0.25 | chb  | -2068 | 7390 | grd7 | BH-03-9 | 3  | NaN |
| BH039_grd67@43.asc | 19.39 | 0.25 | chb  | -2318 | 7390 | grd7 | BH-03-9 | 4  | NaN |
| BH039_grd67@44.asc | 19.02 | 0.29 | chb  | -2318 | 7630 | grd7 | BH-03-9 | 5  | NaN |
| BH039_grd67@45.asc | 18.78 | 0.29 | chb  | -2068 | 7630 | grd7 | BH-03-9 | 6  | NaN |
| BH039_grd67@46.asc | 17.95 | 0.25 | chb  | -2068 | 7870 | grd7 | BH-03-9 | 7  | NaN |
| BH039_grd67@47.asc | 18.05 | 0.29 | chb  | -2318 | 7870 | grd7 | BH-03-9 | 8  | NaN |
| BH039_grd67@48.asc | 18.18 | 0.23 | carb | -2318 | 8110 | grd7 | BH-03-9 | 9  | NaN |
| BH039_grd67@49.asc | 19.12 | 0.27 | carb | -2068 | 8110 | grd7 | BH-03-9 | 10 | NaN |
| BH039_grd8@1.asc   | 18.72 | 0.14 | chb  | -3858 | NaN  | grd8 | BH-03-9 | 1  | NaN |
| BH039_grd8@2.asc   | 18.45 | 0.20 | chb  | -3708 | NaN  | grd8 | BH-03-9 | 2  | NaN |
| BH039_grd8@3.asc   | 17.97 | 0.12 | chb  | -3708 | NaN  | grd8 | BH-03-9 | 3  | NaN |
| BH039_grd8@4.asc   | 18.38 | 0.12 | chb  | -3858 | NaN  | grd8 | BH-03-9 | 4  | NaN |
| BH039_grd8@5.asc   | 18.69 | 0.16 | chb  | -3858 | 7495 | grd8 | BH-03-9 | 5  | NaN |
| BH039_grd8@6.asc   | 18.45 | 0.15 | chb  | -3708 | 7495 | grd8 | BH-03-9 | 6  | NaN |
| BH039_grd8@7.asc   | 17.56 | 0.15 | carb | -3708 | NaN  | grd8 | BH-03-9 | 7  | NaN |

|                   |       |      |      |       |       |            |         |    |     |
|-------------------|-------|------|------|-------|-------|------------|---------|----|-----|
| BH039_grd8@8.asc  | 17.52 | 0.12 | carb | -3858 | NaN   | grd8       | BH-03-9 | 8  | NaN |
| BH039_grd8@9.asc  | 18.41 | 0.18 | carb | -3858 | NaN   | grd8       | BH-03-9 | 9  | NaN |
| BH039_grd8@10.asc | 18.01 | 0.11 | carb | -3708 | NaN   | grd8       | BH-03-9 | 10 | NaN |
| BH039_grd9@4.asc  | 18.72 | 0.18 | chb  | -2699 | NaN   | grd9       | BH-03-9 | 1  | NaN |
| BH039_grd9@5.asc  | 17.84 | 0.15 | chb  | -2599 | NaN   | grd9       | BH-03-9 | 2  | NaN |
| BH039_grd9@6.asc  | 17.82 | 0.17 | chb  | -2599 | NaN   | grd9       | BH-03-9 | 3  | NaN |
| BH039_grd9@7.asc  | 17.97 | 0.14 | chb  | -2699 | NaN   | grd9       | BH-03-9 | 4  | NaN |
| BH039_grd9@8.asc  | 18.39 | 0.14 | chb  | -2699 | NaN   | grd9       | BH-03-9 | 5  | NaN |
| BH039_grd9@9.asc  | 18.72 | 0.15 | chb  | -2599 | NaN   | grd9       | BH-03-9 | 6  | NaN |
| BH039_grd9@10.asc | 17.91 | 0.18 | chb  | -2599 | NaN   | grd9       | BH-03-9 | 7  | NaN |
| BH039_grd9@11.asc | 18.35 | 0.14 | chb  | -2699 | NaN   | grd9       | BH-03-9 | 8  | NaN |
| BH039_grd9@12.asc | 17.45 | 0.13 | chb  | -2699 | -3013 | grd9       | BH-03-9 | 9  | NaN |
| BH039_grd9@13.asc | 17.93 | 0.17 | chb  | -2599 | -3013 | grd9       | BH-03-9 | 10 | NaN |
| BH039_cav@4.asc   | 18.55 | 0.12 | cav  | -2091 |       | grdcement  | BH-03-9 | 1  | NaN |
| BH039_cav@5.asc   | 18.18 | 0.15 | cav  | -1893 | -4243 | grdcement  | BH-03-9 | 2  | NaN |
| BH039_cav@6.asc   | 17.96 | 0.17 | cav  | -1645 |       | grdcement  | BH-03-9 | 3  | NaN |
| BH039_cav@7.asc   | 20.34 | 0.15 | cav  | -1558 | -4189 | grdcement  | BH-03-9 | 4  | NaN |
| BH039_cav@8.asc   | 17.79 | 0.16 | cav  | -1222 | -4176 | grdcement  | BH-03-9 | 5  | NaN |
| BH039_cav@9.asc   | 17.57 | 0.17 | chb  | -1188 | -3784 | grdcement  | BH-03-9 | 6  | NaN |
| BH039_cav@10.asc  | 17.79 | 0.15 | chb  | -1388 |       | grdcement  | BH-03-9 | 7  | NaN |
| BH039_cav@11.asc  | 17.10 | 0.13 | chb  | -1670 |       | grdcement  | BH-03-9 | 8  | NaN |
| BH039_cav@12.asc  | 17.03 | 0.15 | chb  | -1695 | -4641 | grdcement  | BH-03-9 | 9  | NaN |
| BH039_cav@13.asc  | 17.19 | 0.19 | chb  | -1276 |       | grdcement  | BH-03-9 | 10 | NaN |
| BH039_cav2@1.asc  | 18.70 | 0.15 | cav  | -1438 |       | grdcement2 | BH-03-9 | 1  | NaN |
| BH039_cav2@2.asc  | 17.76 | 0.20 | cav  | -1732 |       | grdcement2 | BH-03-9 | 2  | NaN |
